# Supplementary material for: Amidic resonance not a barrier for transamidation of N-pivaloyl activated amides: catalyst, base and additive free conditions
Source: Royal Society of Chemistry journal article supplement (doi:10.1039/d3ob00418j), 2023-01-01
Supplement: d3ob00418j1.pdf [file d3ob00418j1.pdf]

## Supporting Information

### Amidic Resonance not a Barrier for Transamidation of N-Pivaloyl Activated Amides:

#### Catalyst, Base and Additive Free Conditions

*Ida Angel Priya Samuel Rajan and Saravanakumar Rajendran\**

*Chemistry Division, Vellore Institute of Technology Chennai campus, Vandalur-Kelambakkam road, Chennai – 600127, Tamil Nadu, India.*

\*Corresponding Author & E-mail id: [sar.org@gmail.com](mailto:sar.org@gmail.com) & [Saravanakumar.r@vit.ac.in](mailto:Saravanakumar.r@vit.ac.in)

#### Table of Contents

|                                                                                        |    |
|----------------------------------------------------------------------------------------|----|
| 1. Materials and methods -----                                                         | 5  |
| 2. Synthesis of N-pivaloyl benzamide (1) -----                                         | 6  |
| 3. Synthesis of crotonic amide-----                                                    | 7  |
| 4. Synthesis of isobutyricamide-----                                                   | 7  |
| 5. Synthesis of 4-nitrobenzamide -----                                                 | 8  |
| 6. Synthesis of 4-methoxybenzamide-----                                                | 8  |
| 7. Synthesis of 4-chlorobenzamide-----                                                 | 9  |
| 8. Synthesis of 4- methylbenzamide-----                                                | 9  |
| 9. Synthesis of cinnamamide-----                                                       | 10 |
| 10. Synthesis of 4-methoxycinnamic amide-----                                          | 10 |
| 11. Synthesis of piperic amide-----                                                    | 11 |
| 12. Synthesis of N-methyl benzamide-----                                               | 12 |
| 13. Synthesis of N-benzylbenzamide (4) -----                                           | 15 |
| 14. Synthesis of N- ethylbenzamide (5) -----                                           | 16 |
| 15. Synthesis of N -isobutylbenzamide (6) -----                                        | 16 |
| 16. Chromatogram and mass spectra of pivalic amide and transamidation product (6)----- | 17 |
| 17. Synthesis of N-isopropylbenzamide (7) -----                                        | 18 |
| 18. Synthesis of N-(2-hydroxyethyl)benzamide (8) -----                                 | 18 |
| 19. Synthesis of N-(4-hydroxyphenethyl)benzamide (9) -----                             | 19 |
| 20. Synthesis of phenyl(piperidin-1-yl)methanone (10) -----                            | 19 |

|                                                                                                                           |    |
|---------------------------------------------------------------------------------------------------------------------------|----|
| 21. Synthesis of phenyl(pyrrolidin-1-yl)methanone (11)                                                                    | 20 |
| 22. Synthesis of piperazine-1,4-diylbis(phenylmethanone) (12)                                                             | 21 |
| 23. Synthesis of tert-butyl 4-benzoylpiperazine-1-carboxylate(13)                                                         | 21 |
| 24. Synthesis of morpholino(phenyl)methanone (14)                                                                         | 22 |
| 25. Synthesis of ethyl 2-benzamidoacetate (15)                                                                            | 22 |
| 26. Synthesis of 2-benzamidoacetic acid(16)                                                                               | 23 |
| 27. Synthesis of 2-benzamidopropanoic acid(17)                                                                            | 24 |
| 28. Synthesis of 2-benzamido-3-hydroxypropanoic acid(18)                                                                  | 25 |
| 29. Synthesis of <i>N</i> -benzylacetamide(19)                                                                            | 27 |
| 30. Synthesis of <i>N</i> -benzylbut-2-enamide(20)                                                                        | 27 |
| 31. Synthesis of <i>N</i> -benzylisobutyramide(21)                                                                        | 28 |
| 32. Synthesis of <i>N</i> -benzyl-4-chlorobenzamide(22)                                                                   | 28 |
| 33. Synthesis of <i>N</i> -benzyl-4-nitrobenzamide(23)                                                                    | 29 |
| 34. Synthesis of <i>N</i> -benzyl-4-methoxybenzamide(24)                                                                  | 29 |
| 35. Synthesis of <i>N</i> -benzylcinnamamide(25)                                                                          | 30 |
| 36. Synthesis of (2 <i>E</i> ,4 <i>E</i> )-5-(benzo[ <i>d</i> ][1,3]dioxol-5-yl)- <i>N</i> -benzylpenta-2,4-dienamide(26) | 31 |
| 37. Transamidation of <i>N</i> -ethyl acetamide with benzylamine                                                          | 32 |
| 38. Transamidation of <i>N</i> -methyl benzamide with benzylamine                                                         | 32 |
| 39. Competitive study                                                                                                     | 33 |
| 40. Synthesis of <i>N</i> -isobutryl benzamide(27)                                                                        | 33 |
| 41. Transamidation of <i>N</i> -isobutryl benzamide with benzylamine                                                      | 34 |
| 42. Synthesis of moclobemide (28)                                                                                         | 35 |
| 43. Synthesis of Piperlotine-A (29)                                                                                       | 35 |
| 44. Synthesis of Piperylin (30)                                                                                           | 36 |
| 45. Reference                                                                                                             | 37 |
| 46. <sup>1</sup> H and <sup>13</sup> C NMR spectra of (1)                                                                 | 40 |
| 47. <sup>1</sup> H and <sup>13</sup> C NMR spectra of crotonicamide                                                       | 41 |
| 48. <sup>1</sup> H and <sup>13</sup> C NMR spectra of isobutyricamide                                                     | 42 |
| 49. <sup>1</sup> H and <sup>13</sup> C NMR spectra of 4-nitrobenzamide                                                    | 43 |
| 50. <sup>1</sup> H and <sup>13</sup> C NMR spectra of 4-methoxybenzamide                                                  | 44 |
| 51. <sup>1</sup> H and <sup>13</sup> C NMR spectra of 4-chlorobenzamide                                                   | 45 |

|                                                                                     |           |
|-------------------------------------------------------------------------------------|-----------|
| 52. $^1\text{H}$ and $^{13}\text{C}$ NMR spectra of 4-methylbenzamide-----          | <b>46</b> |
| 53. $^1\text{H}$ and $^{13}\text{C}$ NMR spectra of cinnamamide-----                | <b>47</b> |
| 54. $^1\text{H}$ and $^{13}\text{C}$ NMR spectra of 4-methoxycinnamic amide-----    | <b>48</b> |
| 55. $^1\text{H}$ and $^{13}\text{C}$ NMR spectra of piperic amide-----              | <b>49</b> |
| 56. $^1\text{H}$ and $^{13}\text{C}$ NMR spectra of <i>N</i> -methyl benzamide----- | <b>50</b> |
| 57. $^1\text{H}$ and $^{13}\text{C}$ NMR spectra of <b>(4)</b> -----                | <b>51</b> |
| 58. $^1\text{H}$ and $^{13}\text{C}$ NMR spectra of <b>(5)</b> -----                | <b>52</b> |
| 59. $^1\text{H}$ and $^{13}\text{C}$ NMR spectra of <b>(6)</b> -----                | <b>53</b> |
| 60. $^1\text{H}$ and $^{13}\text{C}$ NMR spectra of <b>(7)</b> -----                | <b>54</b> |
| 61. $^1\text{H}$ and $^{13}\text{C}$ NMR spectra of <b>(8)</b> -----                | <b>55</b> |
| 62. $^1\text{H}$ and $^{13}\text{C}$ NMR spectra of <b>(9)</b> -----                | <b>56</b> |
| 63. $^1\text{H}$ and $^{13}\text{C}$ NMR spectra of <b>(10)</b> -----               | <b>57</b> |
| 64. $^1\text{H}$ and $^{13}\text{C}$ NMR spectra of <b>(11)</b> -----               | <b>58</b> |
| 65. $^1\text{H}$ and $^{13}\text{C}$ NMR spectra of <b>(12)</b> -----               | <b>59</b> |
| 66. $^1\text{H}$ and $^{13}\text{C}$ NMR spectra of <b>(13)</b> -----               | <b>60</b> |
| 67. $^1\text{H}$ and $^{13}\text{C}$ NMR spectra of <b>(14)</b> -----               | <b>61</b> |
| 68. $^1\text{H}$ and $^{13}\text{C}$ NMR spectra of <b>(15)</b> -----               | <b>62</b> |
| 69. $^1\text{H}$ and $^{13}\text{C}$ NMR spectra of <b>(16)</b> -----               | <b>63</b> |
| 70. $^1\text{H}$ and $^{13}\text{C}$ NMR spectra of <b>(17)</b> -----               | <b>64</b> |
| 71. $^1\text{H}$ and $^{13}\text{C}$ NMR spectra of <b>(18)</b> -----               | <b>65</b> |
| 72. $^1\text{H}$ and $^{13}\text{C}$ NMR spectra of <b>(19)</b> -----               | <b>66</b> |
| 73. $^1\text{H}$ and $^{13}\text{C}$ NMR spectra of <b>(20)</b> -----               | <b>67</b> |
| 74. $^1\text{H}$ and $^{13}\text{C}$ NMR spectra of <b>(21)</b> -----               | <b>68</b> |
| 75. $^1\text{H}$ and $^{13}\text{C}$ NMR spectra of <b>(22)</b> -----               | <b>69</b> |
| 76. $^1\text{H}$ and $^{13}\text{C}$ NMR spectra of <b>(23)</b> -----               | <b>70</b> |
| 77. $^1\text{H}$ and $^{13}\text{C}$ NMR spectra of <b>(24)</b> -----               | <b>71</b> |
| 78. $^1\text{H}$ and $^{13}\text{C}$ NMR spectra of <b>(25)</b> -----               | <b>72</b> |
| 79. $^1\text{H}$ and $^{13}\text{C}$ NMR spectra of <b>(26)</b> -----               | <b>73</b> |
| 80. $^1\text{H}$ and $^{13}\text{C}$ NMR spectra of <b>(27)</b> -----               | <b>74</b> |
| 81. $^1\text{H}$ and $^{13}\text{C}$ NMR spectra of <b>(28)</b> -----               | <b>75</b> |
| 82. $^1\text{H}$ and $^{13}\text{C}$ NMR spectra of <b>(29)</b> -----               | <b>76</b> |

**1. Materials and methods*****Materials***

All commercially obtained reagents/solvents were used as received; chemicals were purchased from Spectrochem<sup>®</sup>, SRL<sup>®</sup>, Acros Organics<sup>®</sup>, RANKEM<sup>®</sup>, Fisher Scientific<sup>®</sup>, and used as received without further purification. Unless stated otherwise, reactions were conducted in oven-dried glassware and under normal atmospheric conditions. <sup>1</sup>H NMR and <sup>13</sup>C NMR spectra were recorded on Bruker 400 MHz spectrometer operating with the <sup>13</sup>C resonance frequency of 100 MHz and proton resonance frequency of 400 MHz. Data from the <sup>1</sup>H NMR spectroscopy are reported as chemical shift ( $\delta$  ppm) with the corresponding integration values. Coupling constants ( $J$ ) are reported in hertz (Hz). Standard abbreviations indicating multiplicity were used as follows: s (singlet), br (broad), d (doublet), t (triplet), q (quartet) and m (multiplet). Data from <sup>13</sup>C NMR spectra are reported in terms of chemical shift ( $\delta$  ppm). High-resolution mass spectra were recorded on Electrospray Ionization mode on WATERS- XEVO G2-XS-QToS mass spectrometer in positive (ESI+) ion mode. Mass spectra were recorded on Perkin Elmer Clarus 600/Shimadzu QP2020 GC-MS spectrometer in EI mode. Melting points were recorded with REMI DDMS 2545. The instrument is calibrated with benzoic acid before the measurement.

***Abbreviation used in this supporting information***

DCM – Dichloromethane

DMF – Dimethyl formamide

THF – Tetrahydrofuran

TEA – Triethyl amine

EtOAc – Ethyl acetate

RT – Room temperature

### Synthesis of *N*-pivaloyl benzamide

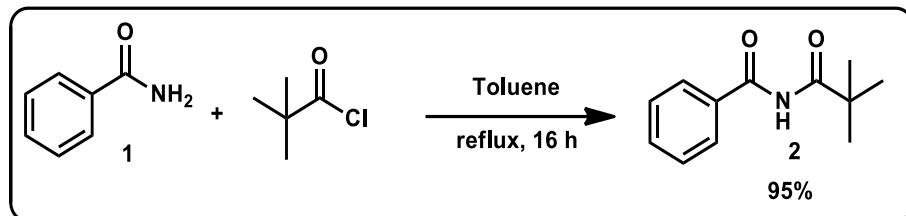

To a stirred solution of benzamide (1 g, 8.23 mmol), in 20 mL of toluene at room temperature, pivaloyl chloride (991 mg, 8.23 mmol) was added dropwise. After addition, the reaction mixture was refluxed for 16 h. Progress of the reaction was monitored by TLC [hexane-EtOAc (7:3)]. After completion, the reaction mixture was washed with 5% NaHCO<sub>3</sub> solution (2 x 50 mL) and water (1 x 50 mL). The organic layer was dried over anhyd. Na<sub>2</sub>SO<sub>4</sub> and concentrated under reduced pressure. The obtained crude mixture was washed with hexane (10 mL) to get pure product as half-white solid in 1.60 g (95 % yield).

**Physical Characteristics: Colour and appearance:** Half-white solid

**M.pt:** 127 °C – 129 °C (Lit. m.pt = 126 °C – 127 °C)<sup>1</sup>

**Spectral data:**

**<sup>1</sup>H NMR** (400 MHz, DMSO-d<sub>6</sub>) δ: 1.24 (9H, s), 7.51 (2H, t, *J* = 8 Hz), 7.61 (1H, t, *J* = 8 Hz), 7.71 (2H, t, *J* = 8 Hz), 10.41 (1H, s). **<sup>13</sup>C NMR** (100 MHz, DMSO-d<sub>6</sub>) δ: 26.8, 128.7, 128.8, 132.7, 135.1, 168.52, 177.6. **GC-MS (EI<sup>+</sup>) *m/z*:** [M]<sup>+</sup> 205.05.

### General Procedure: Synthesis of aliphaticamides, benzamides and cinnamamides

To a solution of substituted benzoic acid or cinnamic acid in ethylene dichloride at RT, thionyl chloride was added slowly and the reaction mixture was stirred for 1 hour at room temperature and then refluxed for 3 hours. Excess thionyl chloride was distilled off. Without further purification the crude product was taken to next step. To a cold (5 °C) aq. ammonia solution, the prepared acid chloride in THF was added dropwise and stirred vigorously at RT for 3 h. The obtained solid is filtered, washed with water and dried.

### Synthesis of crotonicamide

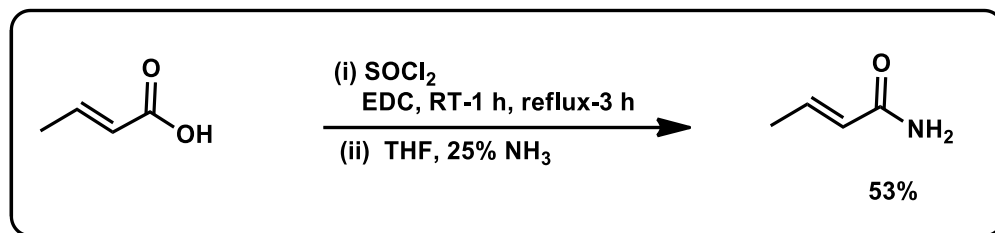

The general procedure stated above was followed. Crotonic acid (500 mg, 5.74 mmol), thionyl chloride (1.25 mL, 17.2 mmol), 25% of ammonia solution (8 mL, 114.8 mmol). Pure product was obtained as half-white solid in 258 mg (53% yield).

#### **Physical Characteristics:**

**Colour and appearance:** halfwhite solid

**M.pt:** 130 °C – 135 °C

#### **Spectral data:**

**$^1\text{H}$  NMR:** (400 MHz,  $\text{DMSO-d}_6$ )  $\delta$ : 1.75 (3H, d,  $J = 8$  Hz), 5.88 (1H, d,  $J = 16$  Hz), 6.56 – 6.65 (1H, m), 6.85 (1H, s), 7.36 (1H, s).  **$^{13}\text{C}$  NMR:** (100 MHz,  $\text{DMSO-d}_6$ )  $\delta$ : 17.7, 126.2, 139.0, 167.4. **GC-MS ( $\text{EI}^+$ )  $m/z$ :**  $[\text{M}]^+$  85.05.

### Synthesis of isobutamide

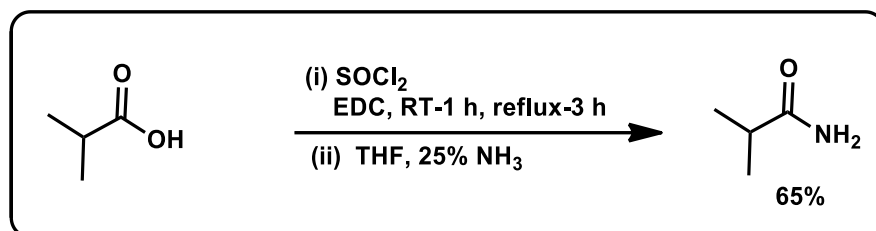

The general procedure stated above was followed. isobutyric (500 mg, 5.68 mmol), thionyl chloride (1.25 mL, 17.2 mmol), 25% of ammonia solution (8 mL, 113.8 mmol). Pure product was obtained as white solid in 321 mg (65% yield).

#### **Physical Characteristics:**

**Colour and appearance:** white solid

**M.pt:** 126 °C – 130 °C

#### **Spectral data:**

**$^1\text{H}$  NMR:** (400 MHz,  $\text{DMSO-d}_6$ )  $\delta$ : 0.98 (6H, d,  $J = 8$  Hz), 2.27 – 2.37 (1H, m), 6.64 (1H, s), 7.22 (1H, s).  **$^{13}\text{C}$  NMR:** (100 MHz,  $\text{DMSO-d}_6$ )  $\delta$ : 19.9, 34.1, 179.2. **GC-MS ( $\text{EI}^+$ )  $m/z$ :**  $[\text{M}]^+$  87.05

### Synthesis of 4-nitrobenzamide

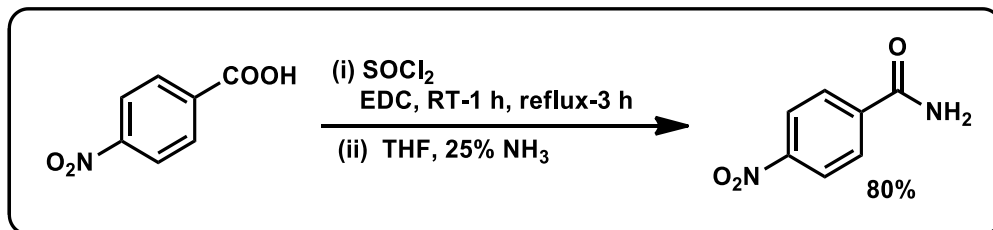

The general procedure stated above was followed. 4-Nitro benzoic acid (500 mg, 2.99 mmol), thionyl chloride (0.65 mL, 8.97 mmol), 25% of ammonia solution (4 mL, 59.8 mmol). Pure product was obtained as white solid in 397 mg (80% yield).

#### Physical Characteristics:

**Colour and appearance:** White solid

**M.pt:** 200 °C – 201 °C (Lit. m.pt = 196 °C – 198 °C)<sup>2</sup>

#### Spectral data:

**<sup>1</sup>H NMR:** (400 MHz, DMSO-d<sub>6</sub>) δ: 7.74 (1H, br, s), 8.09 (2H, d, *J* = 12 Hz), 8.30 (3H, d, *J* = 12 Hz). **<sup>13</sup>C NMR:** (100 MHz, DMSO-d<sub>6</sub>) δ: 123.9, 129.3, 140.4, 149.5, 166.7. **GC-MS (EI<sup>+</sup>) *m/z*:** [M]<sup>+</sup> 166.05

### Synthesis of 4-methoxybenzamide

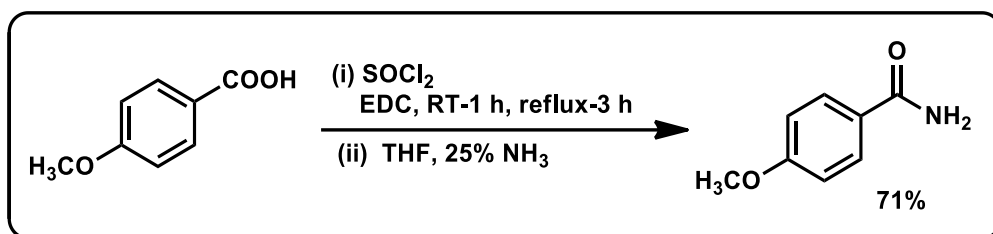

The general procedure stated above was followed. 4-Methoxy benzoic acid (500 mg, 3.28 mmol), thionyl chloride (0.70 mL, 9.86 mmol), 25% of ammonia solution (4.5 mL 65.6 mmol). Pure product was obtained as white solid in 351 mg (71% yield).

#### Physical Characteristics:

**Colour and appearance:** White solid

**M.pt:** 165 °C – 166 °C (Lit. m.pt = 165 °C – 167 °C)<sup>3</sup>

**Spectral data:**  $^1\text{H NMR}$ : (400 MHz, DMSO- $d_6$ )  $\delta$ : 3.80 (3H, s), 6.97 (2H, d,  $J = 12$  Hz), 7.19 (1H, s), 7.85 (3H, d,  $J = 8$  Hz).  $^{13}\text{C NMR}$ : (100 MHz, DMSO- $d_6$ )  $\delta$ : 55.7, 113.8, 126.9, 129.8, 162.0, 167.9. **GC-MS (EI $^+$ )  $m/z$ :** [M] $^+$  151.10

*Synthesis of 4-chlorobenzamide*

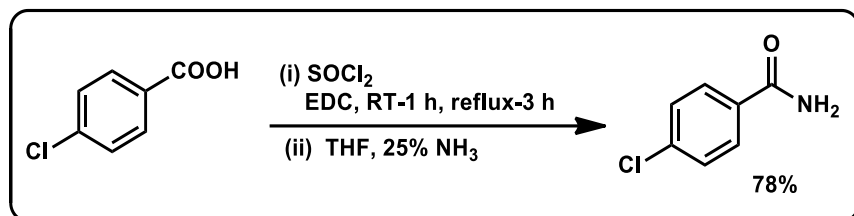

The general procedure stated above was followed. 4-Chloro benzoic acid (500 mg, 3.20 mmol), thionyl chloride (0.69 mL, 9.61 mmol), 25% of ammonia solution (4.3 mL 64.0 mmol). Pure product was obtained as white solid in 387 mg (78% yield).

**Physical Characteristics:**

**Colour and appearance:** White solid

**M.pt:** 175 °C – 176 °C (Lit. m.pt = 178 °C – 180 °C)<sup>2</sup>

**Spectral data:**

$^1\text{H NMR}$ : (400 MHz, DMSO- $d_6$ )  $\delta$ : 7.47 (1H, br, s), 7.52 (2H, d,  $J = 12$  Hz), 7.89 (2H, d,  $J = 8$  Hz), 8.06 (1H, s).  $^{13}\text{C NMR}$ : (100 MHz, DMSO- $d_6$ )  $\delta$ : 128.7, 129.8, 133.4, 136.5, 167.3. **GC-MS (EI $^+$ )  $m/z$ :** [M] $^+$  155.05.

*Synthesis of 4-methylbenzamide*

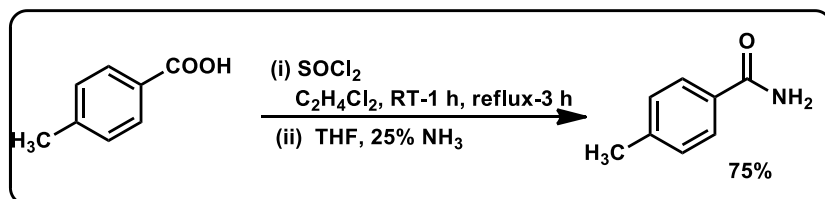

The general procedure stated above was followed. 4-Methyl benzoic acid (500 mg, 3.67 mmol), thionyl chloride (0.79 mL, 11.01 mmol), 25% of ammonia solution (5.0 mL 73.4 mmol). Pure product was obtained as white solid in 372 mg (75% yield).

**Physical Characteristics:**

**Colour and appearance:** White solid

**M.pt:** 160 °C – 163 °C (Lit. m.pt = 159 °C – 160 °C)<sup>4</sup>

**Spectral data:**



**<sup>1</sup>H NMR:** (400 MHz, DMSO-d<sub>6</sub>) δ: 2.34 (3H, s), 7.25 (3H, d, *J* = 8 Hz), 7.77 (2H, d, *J* = 8 Hz), 7.91 (1H, s). **<sup>13</sup>C NMR:** (100 MHz, DMSO-d<sub>6</sub>) δ: 21.3, 127.9, 129.2, 131.8, 141.6, 168.

**GC-MS (EI<sup>+</sup>) *m/z*:** [M]<sup>+</sup> 135.05.

*Synthesis of cinnamic amide*

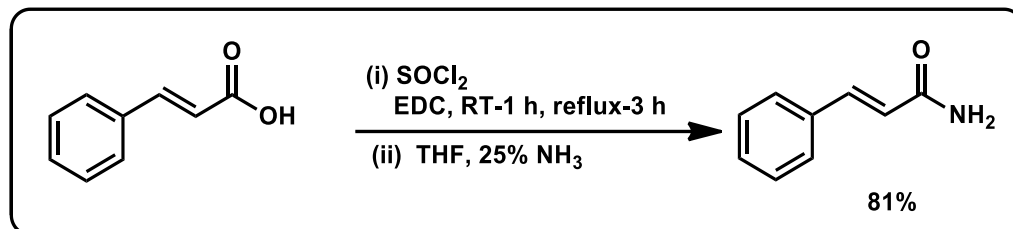

The general procedure stated above was followed. Cinnamic acid (500 mg, 3.37 mmol), thionyl chloride (0.73 mL, 10.1 mmol), 25% of ammonia solution (4.6 mL, 67.4 mmol). Pure product was obtained as white solid in 401 mg (81% yield).

**Physical Characteristics:**

**Colour and appearance:** White solid

**M.pt:** 148 °C – 150 °C (Lit. m.pt = 145 °C – 146 °C)<sup>5</sup>

**Spectral data:**

**<sup>1</sup>H NMR:** (400 MHz, DMSO-d<sub>6</sub>) δ: 6.64 (1H, d, *J* = 16 Hz), 7.14 (1H, br, s), 7.35- 7.46 (4H, m), 7.56 (3H, d, *J* = 8 Hz). **<sup>13</sup>C NMR:** (100 MHz, DMSO-d<sub>6</sub>) δ: 127.5, 132.7, 134.1, 134.6, 140.0, 144.4, 172.0. **GC-MS (EI<sup>+</sup>) *m/z*:** [M]<sup>+</sup> 147.00

*Synthesis of 4-methoxycinnamic amide*

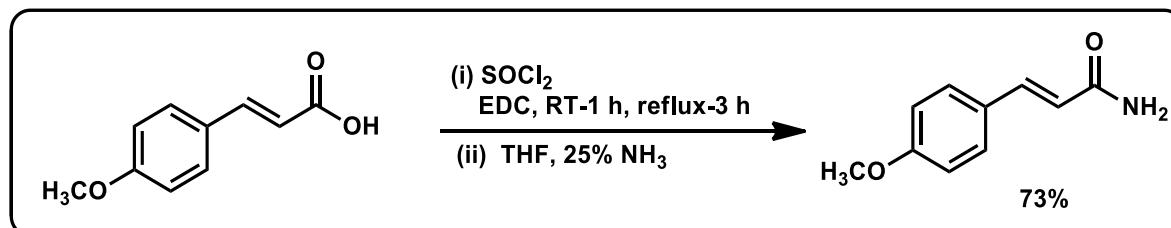

The general procedure stated above was followed. 4-Methoxy cinnamic acid (500 mg, 2.80 mmol), thionyl chloride (0.61 mL, 8.41 mmol), 25% of ammonia solution (3.8 mL 56.0 mmol). Pure product was obtained as half-white solid in 361 mg (73% yield).

**Physical Characteristics:**

**Colour and appearance:** Half-white solid

**M.pt:** 198 °C – 199 °C (Lit. m.pt = 195 °C – 200 °C)<sup>6</sup>

### **Spectral data:**

**<sup>1</sup>H NMR:** (400 MHz, DMSO-d<sub>6</sub>) δ: 3.69 (3H, s), 6.37 (1H, d, *J* = 16 Hz), 6.89 (3H, t, *J* = 8 Hz), 7.27 (1H, d, *J* = 16 Hz), 7.40 (3H, t, *J* = 8 Hz). **<sup>13</sup>C NMR:** (100 MHz, DMSO-d<sub>6</sub>) δ: 60.4, 119.5, 124.9, 132.6, 134.3, 144.1, 165.5, 172.2. **GC-MS (EI<sup>+</sup>) *m/z*:** [M]<sup>+</sup>177.10

### *Synthesis of piperic amide*

#### **Synthesis of piperic acid from piperine**

A literature reported procedure was followed for synthesis of piperic acid from piperine.<sup>6</sup>

To a cold solution of piperic acid in DCM at 0 °C, thionyl chloride was added slowly, the reaction mixture was stirred for 1 hour at room temperature and then refluxed for 3 hours. Excess thionyl chloride was distilled off. Without further purification the crude product was taken to next step.

To a cold solution (5 °C) of aq. ammonia, the prepared acid chloride in THF was added dropwise and stirred vigorously at RT for 3 h. The obtained solid was filtered, washed with water and dried.

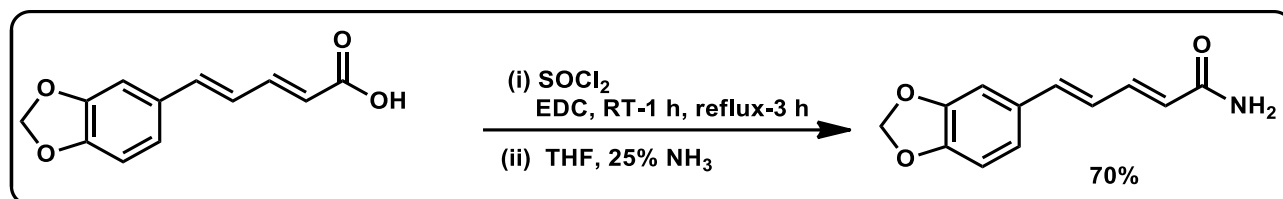

The general procedure stated above was followed. Piperic acid (500 mg, 2.29 mmol), thionyl chloride (0.49 mL, 6.88 mmol), 25% of ammonia solution (3 mL 45.8 mmol). Pure product was obtained as brown solid in 348 mg (70% yield).

### **Physical Characteristics:**

**Colour and appearance:** Brown Solid

**M.pt:** 189 °C – 191 °C

### **Spectral data:**

**<sup>1</sup>H NMR:** (400 MHz, DMSO-d<sub>6</sub>) δ: 6.04 -6.09 (3H, m), 6.86- 6.91 (3H, m), 6.95- 7.01 (2H, m), 7.14 (1H, dd, *J* = 12 Hz, *J* = 4 Hz), 7.25 (1H, s), 7.48 (1H, s). **<sup>13</sup>C NMR:** (100 MHz, DMSO-d<sub>6</sub>) δ: 101.7, 106.1, 108.9, 123.0, 125.0, 125.7, 131.2, 138.3, 140.3, 148.1, 148.3, 167.5. **GC-MS (EI<sup>+</sup>) *m/z*:** [M]<sup>+</sup> 217.10.

### Synthesis of *N*-methyl benzamide

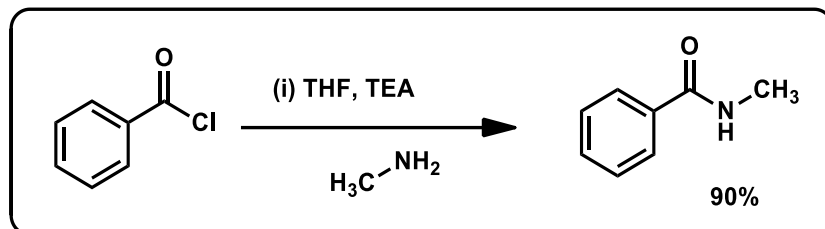

To a cold solution of *N*-methyl amine (166 mg, 5.35 mmol), triethylamine (541 mg, 5.35 mmol) in THF, benzoyl chloride (500 mg, 3.57 mmol) added dropwise and stirred vigorously at RT for 8 h. After completion, the reaction mixture was washed with 5% HCl solution, 5% NaHCO<sub>3</sub> solution and water. The organic layer was dried over anhyd. Na<sub>2</sub>SO<sub>4</sub> and concentrated under reduced pressure. Pure product was obtained after column chromatography as a half white solid in 443 mg (90% yield).

#### Physical Characteristics:

**Colour and appearance:** Half white solid

**M.pt:** 84 °C – 87 °C (Lit. m.pt = 81 °C – 83 °C)<sup>7</sup>

#### Spectral data:

**<sup>1</sup>H NMR:** (400 MHz, DMSO-*d*<sub>6</sub>) δ: 2.76 (3H, d, *J* = 4 Hz), 7.40- 7.48 (3H, m), 7.81 (2H, d, *J* = 8 Hz), 8.40 (1H, s). **<sup>13</sup>C NMR:** (100 MHz, DMSO-*d*<sub>6</sub>) δ: 26.2, 127.0, 128.2, 131.0, 134.5, 166.6.

**GC-MS (EI<sup>+</sup>) *m/z*:** [M]<sup>+</sup> 135.10.

**Table 1:** Reaction optimization for alkyl amines

c1ccccc1C(=O)N  $\xrightarrow[\text{(ii) RT, time, } \text{c1ccc(cc1)CN}]{\text{(i) Pivaloyl chloride, Toluene, reflux, 16 h}}$  c1ccccc1C(=O)Nc2ccccc2 4

1-2 eq. 3

| S. No | Equivalence (amine) | Time   | Yield (%)   |
|-------|---------------------|--------|-------------|
| 1     | 1                   | 1 h    | No reaction |
| 2     | 2                   | 15 min | 64          |
|       |                     | 30 min | 95          |

**General procedure-A:** Transamidation of benzamide with alkyl amines

To a stirred solution of benzamide (1 eq.), in toluene (5 mL) at room temperature, pivaloyl chloride (1 eq.), was added dropwise. After addition, the reaction mixture was refluxed for 16 h. The reaction mixture was cooled down to room temperature. Without further purification the crude product was taken to next step.

To the above synthesized imide in toluene, alkyl amine (2 eq.) was added and stirred at room temperature. Progress of the reaction was monitored by TLC. Starting material consumed within 30 min - 4 h with all the tested amines. After completion, the reaction mixture was washed with 5% HCl solution, 5% NaHCO<sub>3</sub> solution and water. The organic layer was dried over anhyd. Na<sub>2</sub>SO<sub>4</sub> and concentrated under reduced pressure. Pure product was obtained after column chromatography.

**Table 2:** Transamidation of benzamide with alkyl amines

| 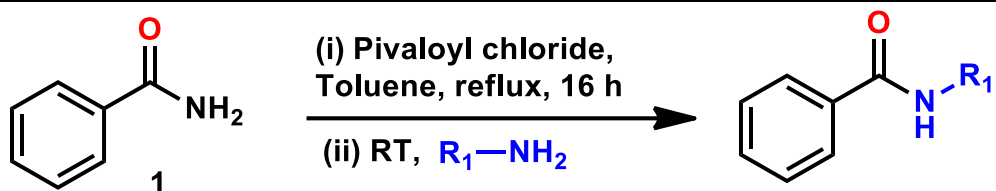 |                                                                                     |                                                                                      |       |        |
|-------------------------------------------------------------------------------------|-------------------------------------------------------------------------------------|--------------------------------------------------------------------------------------|-------|--------|
| S.no                                                                                | Amine                                                                               | Product                                                                              | Yield | Time   |
| 1.                                                                                  |  |  | 95    | 30 min |
| 2.                                                                                  |  |  | 96    | 30 min |
| 3.                                                                                  |  |  | 90    | 30 min |

|     |                                                                                     |                                                                                      |    |        |
|-----|-------------------------------------------------------------------------------------|--------------------------------------------------------------------------------------|----|--------|
| 4.  | 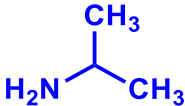   |    | 82 | 1h     |
| 5.  |    |    | 88 | 30 min |
| 6.  |    |    | 79 | 30 min |
| 7.  |   |   | 90 | 1h     |
| 8.  |  |  | 90 | 1h     |
| 9.  |  |  | 73 | 4h     |
| 11. |  |  | 87 | 1h     |

|     |  |  |    |        |
|-----|--|--|----|--------|
| 12. |  |  | 89 | 1h     |
| 13. |  |  | 86 | 45 min |
| 14. |  |  | 70 | 1h     |
| 15. |  |  | 67 | 2h     |
| 16. |  |  | 60 | 2h     |

*Transamidation of benzamide with benzylamine*

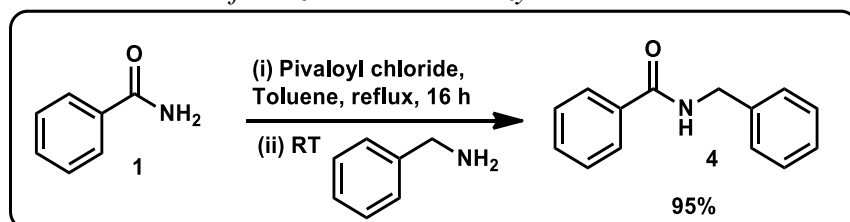

The general procedure-A stated above was followed. Benzamide (100 mg, 0.825 mmol), pivaloyl chloride (99 mg, 0.825mmol), benzylamine (176 mg, 1.65 mmol). Pure product was obtained after column chromatography (Hexane: EtOAc (80:20)) as half-white solid in 165 mg (95%).

**Physical Characteristics:**

**Colour and appearance:** Half-white solid

**M.pt:** 103 °C – 105 °C (Lit. m.pt = 104 °C – 105 °C)<sup>8</sup>

**Spectral data:**

$^1\text{H NMR}$  (400 MHz,  $\text{CDCl}_3$ )  $\delta$ : 4.65 (2H, d,  $J = 8$  Hz), 7.29-7.36 (4H, m), 7.43 (2H, t,  $J = 8$  Hz), 7.48-7.52 (1H, m), 7.79 (2H, d,  $J = 8$  Hz).  $^{13}\text{C NMR}$  (100 MHz,  $\text{CDCl}_3$ )  $\delta$ : 44.1, 126.7, 126.9, 127.6, 127.9, 128.6, 128.8, 131.5, 134.3, 138.1, 167.3. **GC-MS (EI<sup>+</sup>)  $m/z$ : (M<sup>+</sup>): 211.00.**

*Transamidation of benzamide with Ethylamine*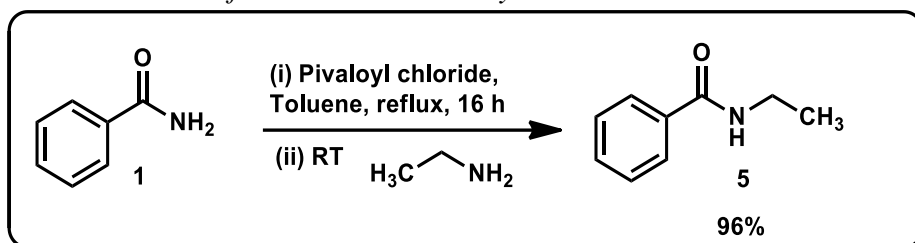

The general procedure-A stated above was followed. Benzamide (100 mg, 0.825 mmol), pivaloyl chloride (99 mg, 0.825mmol), ethylamine (106 mg, 1.65 mmol). Pure product was obtained after column chromatography (Hexane: EtOAc (80:20)) as pale-yellow solid in 118 mg (96% yield).

**Physical Characteristics:**

**Colour and appearance:** Pale-yellow solid

**M.pt:** 66 °C – 69 °C (Lit. m.pt = 71 °C – 72 °C)<sup>9</sup>

**Spectral data:**

$^1\text{H NMR}$  (400 MHz,  $\text{CDCl}_3$ )  $\delta$ : 1.23 (3H, t,  $J = 8$  Hz), 3.47 (2H, d,  $J = 4$  Hz), 6.42 (1H, br, s), 7.38-7.41 (2H, m), 7.45-7.49 (1H, m) 7.76 (2H, d,  $J = 8$  Hz).  $^{13}\text{C NMR}$  (100 MHz,  $\text{CDCl}_3$ )  $\delta$ : 10.1, 14.8, 35.0, 126.9, 128.5, 131.3, 134.6, 167.6. **GC-MS (EI<sup>+</sup>)  $m/z$ : (M<sup>+</sup>): 149.10**

*Transamidation of benzamide with isobutyl amine*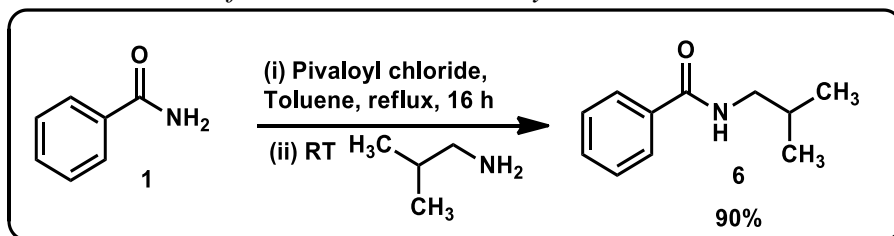

The general procedure-A stated above was followed. Benzamide (100 mg, 0.825 mmol), pivaloyl chloride (99 mg, 0.825mmol), isobutylamine (120 mg, 1.65 mmol). Pure product was obtained after column chromatography (Hexane: EtOAc (80:20)) as pale-yellow solid in 131 mg (90%).

**Physical Characteristics:**

**Colour and appearance:** Pale yellow solid

M.pt: 54 °C – 55 °C (Lit. m.pt = 56 °C – 58 °C)<sup>10</sup>

**Spectral data:**

<sup>1</sup>H NMR (400 MHz, DMSO-d<sub>6</sub>) δ: 0.89 (6H, d, *J* = 8 Hz), 1.82-1.89 (1H, m), 3.09 (2H, t, *J* = 8 Hz), 7.43-7.53 (3H, m), 7.85 (2H, d, *J* = 8Hz), 8.46 (1H, s). <sup>13</sup>C NMR (100 MHz, DMSO-d<sub>6</sub>) δ: 20.6, 28.5, 47.1, 127.6, 128.6, 131.4, 135.2, 166.7. GC-MS (EI<sup>+</sup>) *m/z*: [M]<sup>+</sup> 177.10

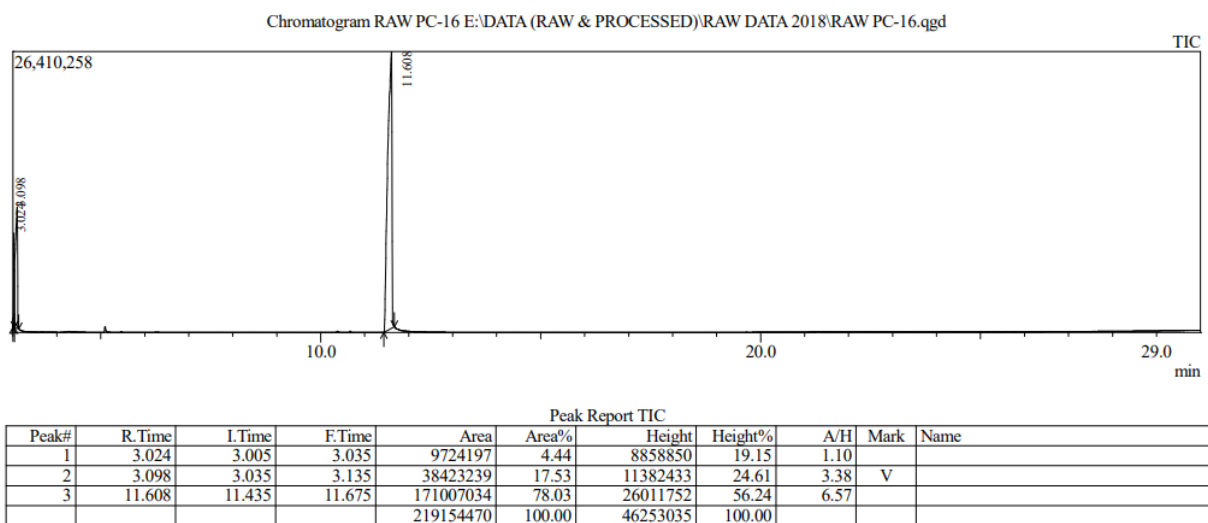

Library

<< Target >>

Line#:1 R. Time:3.025(Scan#:6) MassPeaks:37  
RawMode:Averaged 3.020-3.030(5-7) BasePeak:41.05(1094979)  
BG Mode:Calc. from Peak Group 1 - Event 1 Scan

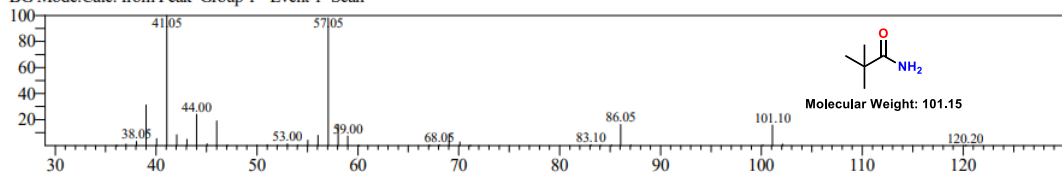

<< Target >>

Line#:3 R. Time:11.610(Scan#:1723) MassPeaks:94  
RawMode:Averaged 11.605-11.615(1722-1724) BasePeak:105.05(7904852)  
BG Mode:Calc. from Peak Group 1 - Event 1 Scan

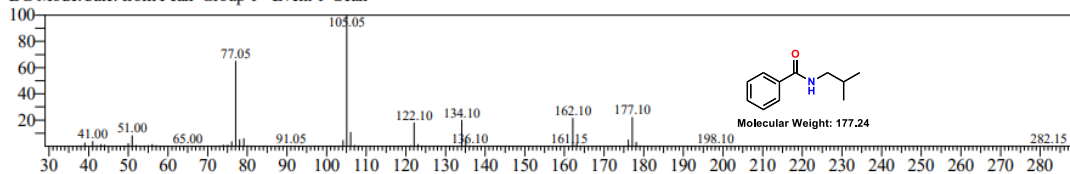

**Figure S1:** Chromatogram and mass spectra of pivalic amide and transamidation product (**6**)



### Transamidation of benzamide with iso-propyl amine

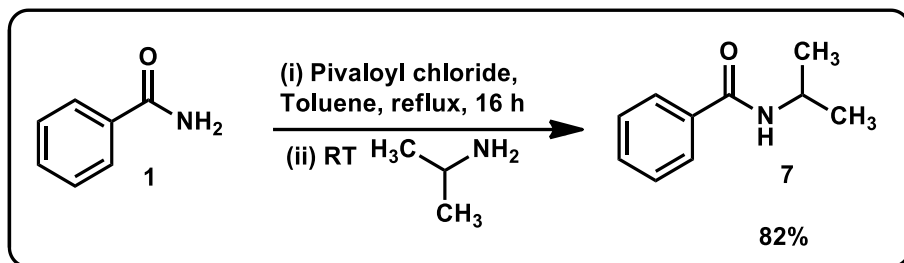

The general procedure-A stated above was followed. Benzamide (100 mg, 0.825 mmol), pivaloyl chloride (99 mg, 0.825mmol), isopropylamine (97.5mg, 1.65 mmol). Pure product was obtained after column chromatography (Hexane: EtOAc (80:20)) as white solid in 110 mg (82% yield).

#### Physical Characteristics:

**Colour and appearance:** White solid

**M.pt:** 97 °C – 98 °C (Lit. m.pt = 97 °C – 99 °C)<sup>11</sup>

#### Spectral data:

**<sup>1</sup>H NMR** (400 MHz, DMSO-d<sub>6</sub>) δ: 1.17 (6H, d, *J* = 8 Hz), 4.08 -4.13 (1H, m), 7.43-7.53 (3H, m), 7.84 (2H, d, *J* = 4 Hz), 8.22 (1H, d, *J* = 8 Hz). **<sup>13</sup>C NMR** (100 MHz, DMSO-d<sub>6</sub>) δ: 22.7, 41.4, 127.6, 128.5, 131.3, 135.3, 165.8. **GC-MS (EI<sup>+</sup>) *m/z*:** [M]<sup>+</sup> 163.10

### Transamidation of benzamide with ethanol amine

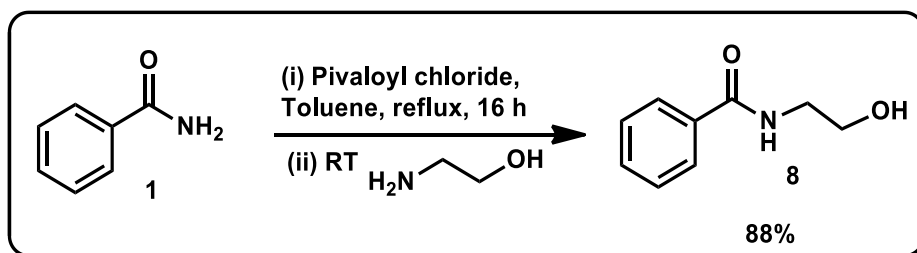

The general procedure-A stated above was followed. Benzamide (100 mg, 0.825 mmol), pivaloyl chloride (99 mg, 0.825mmol), ethanol amine (100 mg, 1.65 mmol). Pure product was obtained after column chromatography (Hexane: EtOAc (80:20)) as white solid in 119 mg (88% yield).

#### Physical Characteristics:

**Colour and appearance:** White Solid

**M.pt:** 60 °C – 63 °C (Lit. m.pt = 60 °C – 62 °C)<sup>12</sup>

### Spectral data:

$^1\text{H NMR}$  (400 MHz,  $\text{DMSO-d}_6$ )  $\delta$ : 3.33- 3.37 (2H, m), 3.51-3.55 (2H, m), 4.78 (1H, t,  $J = 8$  Hz), 7.44- 7.53 (3H, m), 7.86 (2H, d,  $J = 8$  Hz), 8.44 (1H, t,  $J = 8$  Hz).  $^{13}\text{C NMR}$  (100 MHz,  $\text{DMSO-d}_6$ )  $\delta$ : 42.6, 60.2, 127.6, 128.6, 131.5, 134.9, 166.8. **GC-MS (EI<sup>+</sup>)  $m/z$ :**  $[\text{M}]^+$  165.10

### *Transamidation of benzamide with tyramine*

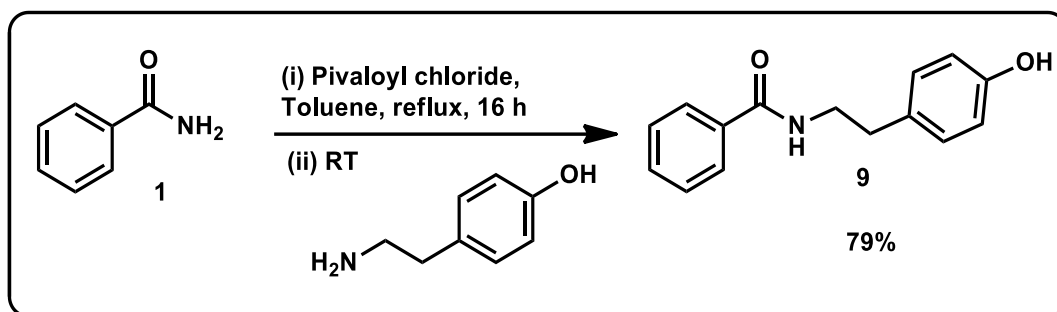

The general procedure-A stated above was followed. Benzamide (100 mg, 0.825 mmol), pivaloyl chloride (99 mg, 0.825mmol), tyramine (226.3 mg, 1.65 mmol). Pure product was obtained after column chromatography (Hexane: EtOAc (80:20)) as light brown solid in 157 mg (79 % yield).

### Physical Characteristics:

**Colour and appearance:** Light brown solid

**M.pt:** 155 °C – 156 °C (Lit. m.pt = 158 °C – 159 °C) <sup>13</sup>

### Spectral data:

$^1\text{H NMR}$  (400 MHz,  $\text{DMSO-d}_6$ )  $\delta$ : 2.73 (2H, t,  $J = 8$  Hz), 6.79 (2H, d,  $J = 8$  Hz), 7.03, (2H, d,  $J = 8$  Hz), 7.43-7.52 (3H, m), 7.82 (2H, d,  $J = 8$  Hz), 8.53 (1H, t,  $J = 8$  Hz), 9.21 (1H, s).  $^{13}\text{C NMR}$  (100 MHz,  $\text{DMSO-d}_6$ )  $\delta$ : 34.7, 41.7, 115.5, 127.5, 128.7, 129.9, 131.5, 135.1, 156.0, 166.6. **GC-MS (EI<sup>+</sup>)  $m/z$ :**  $[\text{M}]^+$  241.00

### *Transamidation of benzamide with piperidine*

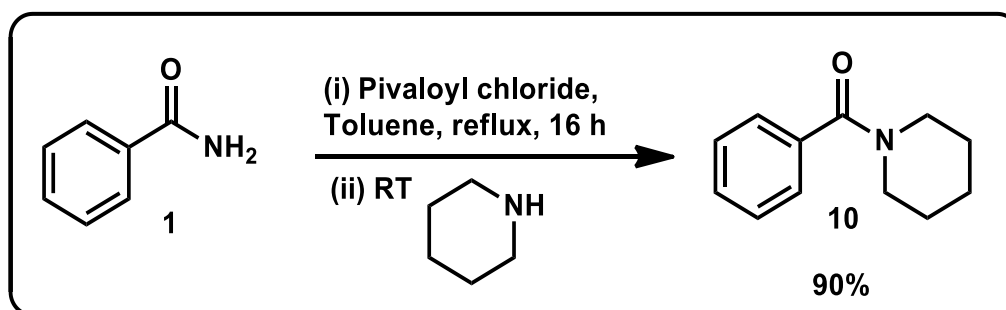

The general procedure-A stated above was followed. Benzamide (100 mg, 0.825 mmol), pivaloyl chloride (99 mg, 0.825mmol), piperidine (140 mg, 1.65 mmol). Pure product was obtained after column chromatography (Hexane: EtOAc (80:20)) as yellow liquid in 143 mg (90% yield).

**Physical Characteristics:**

**Colour and appearance:** Yellow liquid

**Spectral data:**

**<sup>1</sup>H NMR** (400 MHz, DMSO-d<sub>6</sub>) δ: 1.43 -1.60 (6H, m), 3.25 (2H, br, s), 3.58 (2H, s), 7.34- 7.38 (2H, m), 7.43 (3H, t, *J* = 4 Hz). **<sup>13</sup>C NMR** (100 MHz, DMSO-d<sub>6</sub>) δ: 24.5, 25.7, 26.4, 42.7, 48.4, 127.0, 128.8, 129.6, 137.0, 169.3. **GC-MS (EI<sup>+</sup>) *m/z*:** [M]<sup>+</sup> 189.15

*Transamidation of benzamide with pyrrolidine*

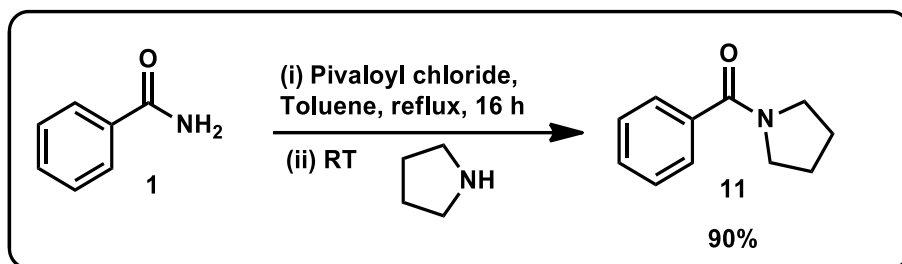

The general procedure-A stated above was followed. Benzamide (100 mg, 0.825 mmol), pivaloyl chloride (99 mg, 0.825mmol), pyrrolidine (117 mg, 1.65 mmol). Pure product was obtained after column chromatography (Hexane: EtOAc (80:20)) as colourless liquid in 130 mg (90% yield).

**Physical Characteristics:**

**Colour and appearance:** Colourless liquid

**Spectral data:**

**<sup>1</sup>H NMR** (400 MHz, DMSO-d<sub>6</sub>) δ: 1.76- 1.89 (4H, m), 3.35 (2H, t, *J* = 8 Hz), 3.46 (2H, t, *J* = 8 Hz), 7.43 (3H, d, *J* = 8 Hz), 7.49- 7.51 (2H, m). **<sup>13</sup>C NMR** (100 MHz, DMSO-d<sub>6</sub>) δ: 24.3, 26.4, 46.3, 49.3, 127.4, 128.6, 130.1, 137.7, 168.7. **GC-MS (EI<sup>+</sup>) *m/z*:** [M]<sup>+</sup> 175.10

### Transamidation of benzamide with Piperazine

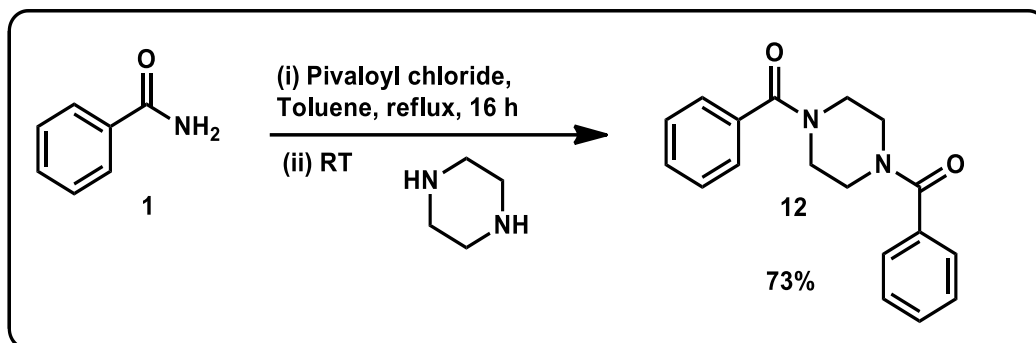

The general procedure-A stated above was followed. Benzamide (100 mg, 0.825 mmol), pivaloyl chloride (99 mg, 0.825mmol), Piperazine (142.0 mg, 1.65 mmol). Pure product was obtained after column chromatography (Hexane: EtOAc (80:20)) as white solid in 177 mg (73% yield).

#### **Physical Characteristics:**

**Colour and appearance:** White solid

**M.pt:** 195 °C – 197 °C (Lit. m.pt = 196 °C – 197 °C)<sup>14</sup>

#### **Spectral data:**

**<sup>1</sup>H NMR** (400 MHz, CDCl<sub>3</sub>) δ: 3.49- 3.63 (8H, m), 7.34 (10H, s). **<sup>13</sup>C NMR** (100 MHz, CDCl<sub>3</sub>) δ: 127.0, 128.6, 130.1, 135.1, 170.6. **GC-MS (EI<sup>+</sup>) m/z:** [M]<sup>+</sup> 294.00

### Transamidation of benzamide with Boc-piperazine

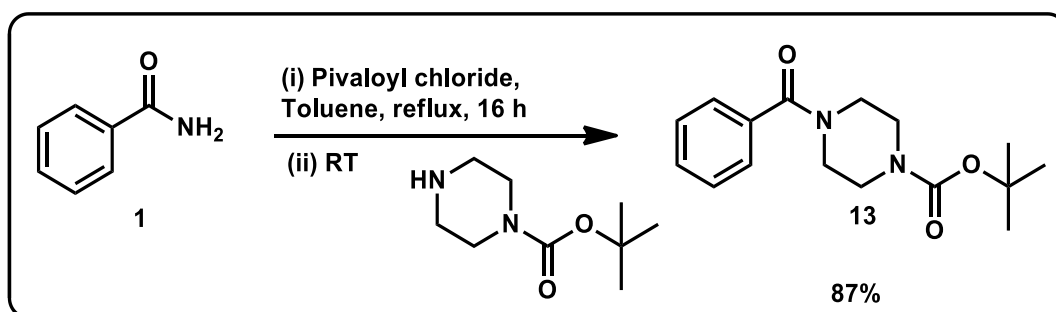

The general procedure-A stated above was followed. Benzamide (100 mg, 0.825 mmol), pivaloyl chloride (99 mg, 0.825mmol), Boc-piperazine (307.3 mg, 1.65 mmol). Pure product was obtained after column chromatography (Hexane: EtOAc (80:20)) as white solid in 208 mg (87% yield).

#### **Physical Characteristics:**

**Colour and appearance:** White Solid

**M.pt:** 107 °C – 109 °C (Lit. m.pt = 107 °C – 108 °C)<sup>15</sup>

**Spectral data:**

**<sup>1</sup>H NMR** (400 MHz, CDCl<sub>3</sub>) δ: 1.39 (9H, s), 3.35-3.65 (8H, m), 7.33 (5H, t, *J* = 8 Hz). **<sup>13</sup>C NMR** (100 MHz, CDCl<sub>3</sub>) δ: 28.3, 80.3, 127.0, 128.5, 129.8, 135.4, 154.5, 170.6. **GC-MS (EI<sup>+</sup>)** *m/z*: [M]<sup>+</sup> 290.10.

*Transamidation of benzamide with Morpholine*

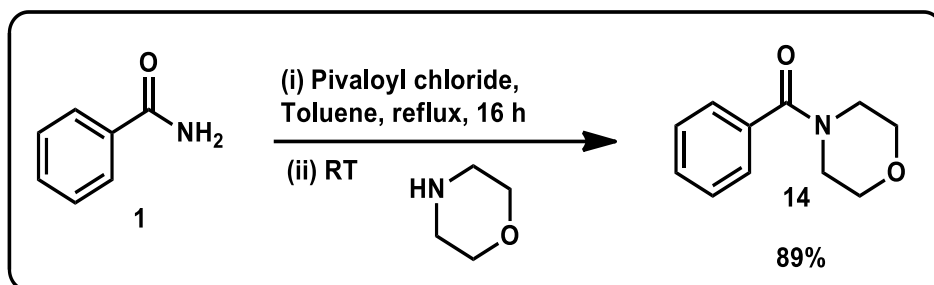

The general procedure-A stated above was followed. Benzamide (100 mg, 0.825 mmol), pivaloyl chloride (99 mg, 0.825mmol), Morpholine (143 mg, 1.65 mmol). Pure product was obtained after column chromatography (Hexane: EtOAc (80:20)) as Pale-yellow Liquid in 140 mg (89% yield).

**Physical Characteristics:**

**Colour and appearance:** Pale yellow Liquid

**Spectral data:**

**<sup>1</sup>H NMR** (400 MHz, DMSO-d<sub>6</sub>) δ: 3.34-3.39 (8H, m), 7.39 – 7.46 (5H, m). **<sup>13</sup>C NMR** (100 MHz, DMSO-d<sub>6</sub>) δ: 66.5, 127.4, 128.9, 129.8, 130.1, 131.1, 135.9, 169.6. **GC-MS (EI<sup>+</sup>)** *m/z*: [M]<sup>+</sup> 191.00

*Transamidation of benzamide with glycine ethyl ester*

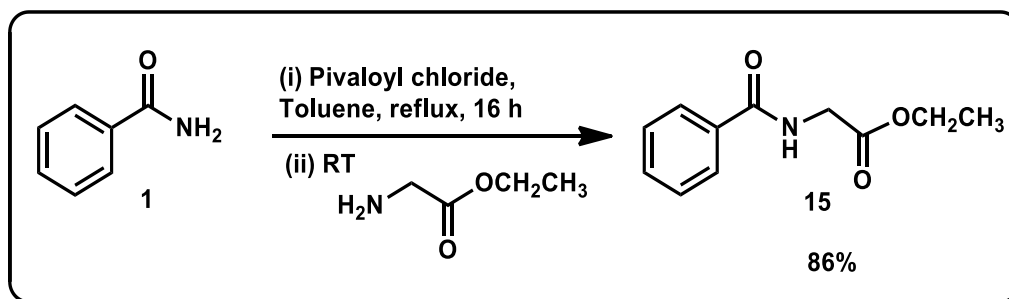

The general procedure-A stated above was followed. Benzamide (100 mg, 0.825 mmol), pivaloyl chloride (99 mg, 0.825mmol), glycine ethyl ester (170.1 mg, 1.65 mmol). Pure product was obtained after column chromatography (Hexane: EtOAc (80:20)) as white solid in 147 mg (86% yield).

**Physical Characteristics:**

**Colour and appearance:** White Solid

**M.pt:** 61 °C – 62 °C (Lit. m.pt = 62 °C)<sup>16</sup>

**Spectral data:**

**<sup>1</sup>H NMR** (400 MHz, DMSO-d<sub>6</sub>) δ: 1.21 (3H, t, *J* = 8 Hz), 4.02 (2H, d, *J* = 4 Hz), 4.10-4.15 (2H, m), 7.47-7.58 (3H, m), 7.89 (2H, d, *J* = 8 Hz), 8.95 (1H, s). **<sup>13</sup>C NMR** (100 MHz, DMSO-d<sub>6</sub>) δ: 14.5, 41.7, 55.3, 60.9, 127.7, 128.8, 131.9, 134.1, 167.1, 170.3. **GC-MS (EI<sup>+</sup>) *m/z*:** [M]<sup>+</sup> 207.00

**General procedure-B:** *Synthesis of N-benzoyl glycine and N-benzoyl alanine*

To a stirred solution of benzamide (1 eq.), in toluene (5 mL) at room temperature, pivaloyl chloride (1 eq.), was added dropwise. After addition, the reaction mixture was refluxed for 16 h. The reaction mixture was cooled down to room temperature. Without further purification the crude product was taken to next step.

To a solution of amino acid (2 eq.), in water (5 eq.), TEA (2 eq.), was added and stirred at room temperature for 15 min. To this, the above synthesized imide in toluene was added dropwise at room temperature and heated to 60 °C. Progress of the reaction was monitored by TLC. Starting material consumed within 2 h. After completion, the reaction mixture was washed with 5% HCl solution and water. The organic layer was dried over anhyd. Na<sub>2</sub>SO<sub>4</sub> and concentrated under reduced pressure. Pure product was obtained after column chromatography.

*Transamidation of benzamide with glycine*

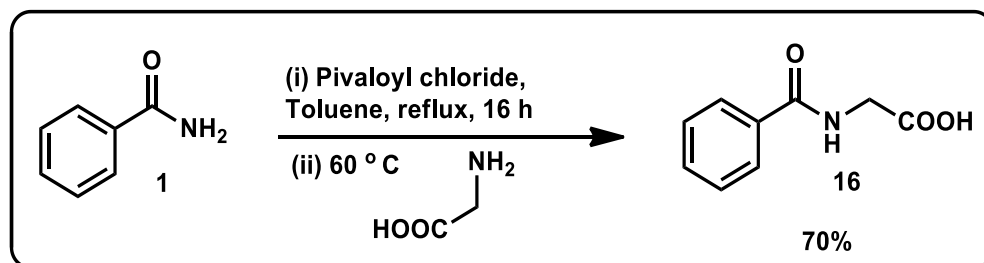

The general procedure-B stated above was followed. Benzamide (100 mg, 0.825 mmol), pivaloyl chloride (99 mg, 0.825mmol), glycine (123.8 mg, 1.65 mmol), water (74 mg, 4.12 mmol), triethylamine (166 mg, 1.65mmol) Pure product was obtained after column chromatography (Chloroform:methanol (90:10)) as white solid in 103 mg (70% yield).

**Physical Characteristics:**

**Colour and appearance:** White solid

**M.pt:** 188 °C -189 °C

**Spectral data:**

**<sup>1</sup>H NMR** (400 MHz, DMSO-d<sub>6</sub>) δ: 3.93 (2H, d, *J* = 8 Hz), 7.49 (2H, t, *J* = 8 Hz), 7.55 (1H, t, *J* = 8 Hz), 7.87 (2H, d, *J* = 8 Hz), 8.84 (1H, t, *J* = 8 Hz). **<sup>13</sup>C NMR** (100 MHz, DMSO-d<sub>6</sub>) δ: 41.6, 127.6, 128.8, 131.9, 134.2, 166.9, 171.8. **HRMS (ESI-MS)** *m/z*: Calculated for C<sub>9</sub>H<sub>9</sub>NO<sub>3</sub>Na [M+Na]<sup>+</sup> 202.0480, found: 202.0481.

*Transamidation of benzamide with alanine*

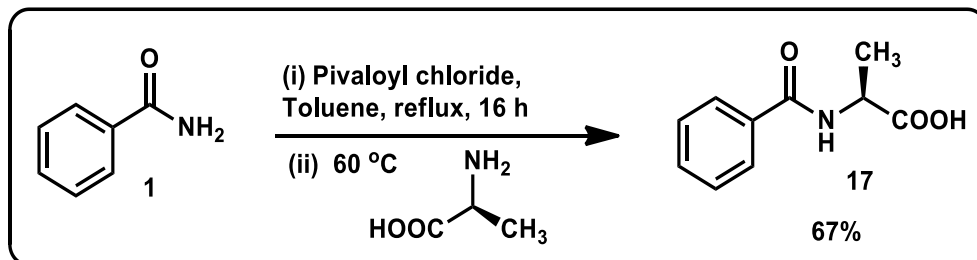

The general procedure-B stated above was followed. Benzamide (100 mg, 0.825 mmol), pivaloyl chloride (99 mg, 0.825mmol), alanine (146.9 mg, 1.65 mmol), water (74 mg, 4.12 mmol), triethylamine (166 mg, 1.65mmol). Pure product was obtained after column chromatography (Chloroform:methanol (90:10)) as white solid in 106 mg (67% yield).

**Physical Characteristics:**

**Colour and appearance:** White Solid

**M.pt:** 137 °C – 139 °C

**Spectral data:**

**<sup>1</sup>H NMR** (400 MHz, DMSO-d<sub>6</sub>) δ: 1.40 (3H, d, *J* = 8 Hz), 4.39-4.46 (1H, m), 7.48 (2H, t, *J* = 8 Hz), 7.55 (1H, t, *J* = 8 Hz), 7.89 (2H, d, *J* = 8 Hz), 8.66 (1H, d, *J* = 4 Hz). **<sup>13</sup>C NMR** (100 MHz, DMSO-d<sub>6</sub>) δ: 17.3, 48.6, 127.8, 128.7, 131.8, 134.3, 166.6, 174.6. **HRMS (ESI-MS)** *m/z*: Calculated for C<sub>10</sub>H<sub>11</sub>NO<sub>3</sub>Na [M+Na]<sup>+</sup> 216.0636, found: 216.0638.

### Transamidation of benzamide with serine

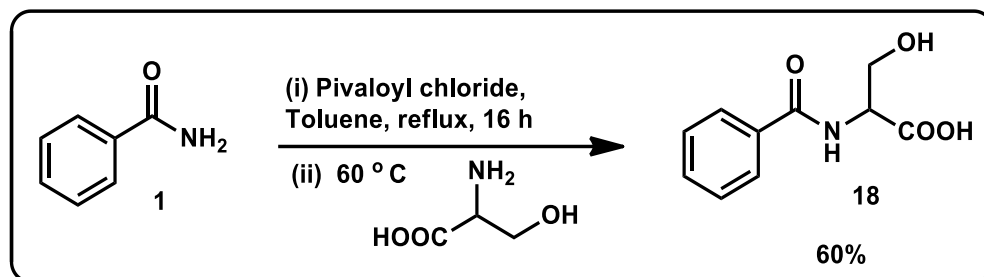

The general procedure-B stated above was followed. Benzamide (100 mg, 0.825 mmol), pivaloyl chloride (99 mg, 0.825mmol), serine (173.2 mg, 1.65 mmol), water (74 mg, 4.12 mmol), triethylamine (166 mg, 1.65mmol). Pure product was obtained after column chromatography (Chloroform:methanol (90:10)) as white solid in 103 mg (60% yield).

#### **Physical Characteristics:**

**Colour and appearance:** White Solid

**M.pt:** 147 °C – 149 °C

#### **Spectral data:**

**<sup>1</sup>H NMR** (400 MHz, DMSO-*d*<sub>6</sub>) δ: 3.77 (2H, d, *J* = 8 Hz), 4.42-4.47 (1H, m), 7.44 -7.53 (3H, m), 7.86 (2H, t, *J* = 8 Hz), 8.37 (1H, d, *J* = 8 Hz). **<sup>13</sup>C NMR** (100 MHz DMSO-*d*<sub>6</sub>) δ: 55.6, 61.2, 127.3, 128.3, 131.4, 133.9, 166.3, 171.9. **HRMS (ESI-MS)** *m/z*: Calculated for C<sub>10</sub>H<sub>11</sub>NO<sub>3</sub>Na [M+Na]<sup>+</sup> 232.0685, found: 232.0550.

#### **General procedure-C:** Transamidation of various amides with *N*-benzyl amine

To a stirred solution of various amides (1 eq.), in toluene (5 mL) at room temperature, pivaloyl chloride (1 eq.), was added dropwise. After addition the reaction mixture was refluxed for 16 h. The reaction mixture was cooled down to room temperature. Without further purification the crude product was taken to next step.

To the above synthesized imide in toluene, benzyl amine (2 eq.), was added and stirred at room temperature. Progress of the reaction was monitored by TLC. Starting material consumed in 30 min - 2 h with benzyl amine. After completion, the reaction mixture was washed with 5% HCl solution, 5% NaHCO<sub>3</sub> solution, water. The organic layer was dried over anhyd. Na<sub>2</sub>SO<sub>4</sub> and concentrated under reduced pressure. Pure product was obtained after column chromatography



**Table 3:** Transamidation of various amides with benzyl amine

| 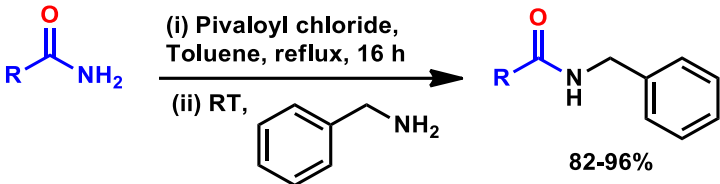 |                                                                                     |                                                                                      |        |        |
|------------------------------------------------------------------------------------|-------------------------------------------------------------------------------------|--------------------------------------------------------------------------------------|--------|--------|
| S.NO                                                                               | Amide                                                                               | Product                                                                              | Yield% | Time   |
| 1.                                                                                 |    |    | 84     | 30 min |
| 2.                                                                                 |    |    | 73     | 1.5h   |
| 3.                                                                                 |   |   | 68     | 1.5h   |
| 4.                                                                                 |  |  | 87     | 45 min |
| 5.                                                                                 |  |  | 96     | 30 min |
| 6.                                                                                 |  |  | 82     | 2h     |
| 7.                                                                                 |  |  | 89     | 1h     |

|    |                                                                                   |                                                                                    |    |    |
|----|-----------------------------------------------------------------------------------|------------------------------------------------------------------------------------|----|----|
| 8. | 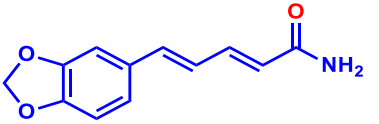 |  | 93 | 1h |
|----|-----------------------------------------------------------------------------------|------------------------------------------------------------------------------------|----|----|

*Transamidation of Acetamide with benzyl amine*

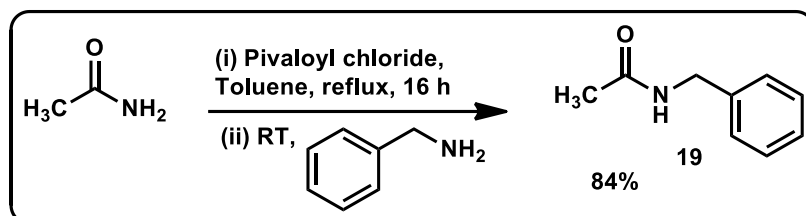

The general procedure-C stated above was followed. Acetamide (100 mg, 1.69 mmol), pivaloyl chloride (203 mg, 1.69mmol), benzylamine (361 mg, 3.38 mmol). Pure product was obtained after column chromatography (Hexane: EtOAc (80:20)) as white solid in 211 mg (84% yield).

**Physical Characteristics:**

**Colour and appearance:** White solid

**M.pt:** 62 °C – 65 °C (Lit. m.pt = 67 °C – 68 °C)<sup>9</sup>

**Spectral data:**

**<sup>1</sup>H NMR** (400 MHz, CDCl<sub>3</sub>) δ: 1.89 (3H, s), 4.28 (2H, d, *J* = 4 Hz), 6.40 (1H, s), 7.16 - 7.25 (5H, m). **<sup>13</sup>C NMR** (100 MHz, CDCl<sub>3</sub>) δ: 23.0, 43.6, 127.4, 127.7, 128.6, 138.2, 170.4. **GC-MS (EI<sup>+</sup>) *m/z*:** (M<sup>+</sup>): 149.10

*Transamidation of Crotonicamide with benzyl amine*

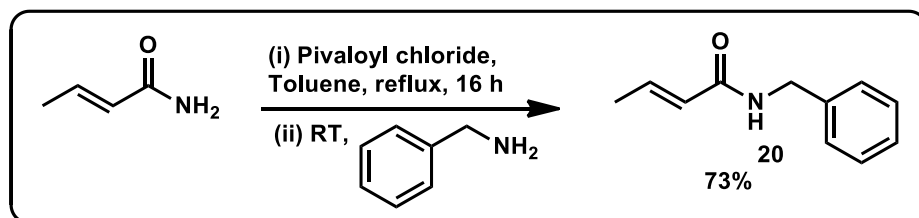

The general procedure-C stated above was followed. Crotonicamide (100 mg, 1.13 mmol), pivaloyl chloride (136 mg, 1.13mmol), benzylamine (241 mg, 2.26 mmol). Pure product was obtained after column chromatography (Hexane: EtOAc (80:20)) as Half-white solid in 144 mg (73% yield).

**Physical Characteristics:**

**Colour and appearance:** Half-White solid

**M.pt:** 114 °C – 116 °C

### Spectral data:

**<sup>1</sup>H NMR** (400 MHz, DMSO-d<sub>6</sub>) δ: 1.79 (3H, d, *J* = 4 Hz), 4.33 (2H, d, *J* = 8 Hz), 5.98 (1H, d, *J* = 16 Hz), 6.63 – 6.72 (1H, m), 7.24 – 7.26 (3H, m), 7.30 – 7.33 (2H, m), 8.42 (1H, s). **<sup>13</sup>C NMR** (100 MHz, DMSO-d<sub>6</sub>) δ: 17.8, 42.5, 126.0, 127.2, 127.7, 128.7, 138.8, 139.9, 165.9. **GC-MS (EI<sup>+</sup>) *m/z*:** (M<sup>+</sup>): 175.00.

### *Transamidation of isobutricamide with benzyl amine*

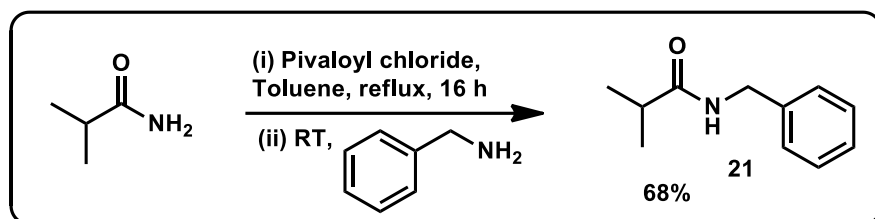

The general procedure-C stated above was followed. isobutricamide (100 mg, 1.14 mmol), pivaloyl chloride (140 mg, 1.14mmol), benzylamine (245 mg, 2.28 mmol). Pure product was obtained after column chromatography (Hexane: EtOAc (80:20)) as white solid in 137 mg (68% yield).

### Physical Characteristics:

**Colour and appearance:** White solid

**M.pt:** 82 °C – 85 °C (Lit. m.pt = 84 °C – 86 °C)<sup>37</sup>

**H NMR:** (400 MHz, CDCl<sub>3</sub>) δ: 1.11 (3H, d, *J* = 4 Hz). 2.29-2.36 (1H, m), 3.35 (2H, *d*, *J* = 8 Hz), 5.86 (1H, s, br), 7.18 – 7.21(3H, m), 7.25 (2H, *t*, *J* = 8 Hz). **<sup>13</sup>C NMR:** (100 MHz CDCl<sub>3</sub>) δ: 19.6, 35.6, 43.5, 127.4, 127.7, 128.7, 138.4, 177.0. **GC-MS (EI<sup>+</sup>) *m/z*:** (M<sup>+</sup>): 178.10.

### *Transamidation of 4-chloro benzamide with benzyl amine*

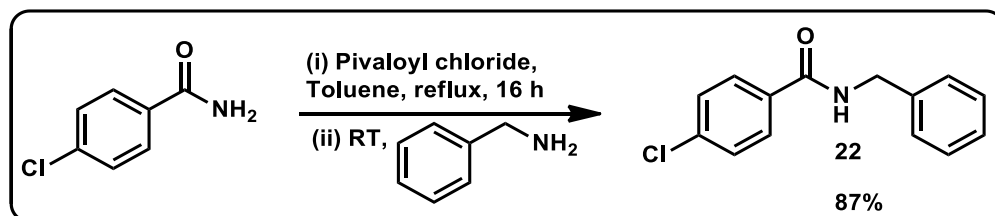

The general procedure-C stated above was followed. 4-chlorobenzamide (100 mg, 0.64 mmol), pivaloyl chloride (77 mg, 0.64mmol), benzylamine (137 mg, 1.28 mmol). Pure product was obtained after column chromatography (Hexane: EtOAc (80:20)) as half-white solid in 136 mg (87% yield).

### Physical Characteristics:

**Colour and appearance:** Half white solid

**M.pt:** 160 °C –162 °C (Lit. M.pt = 159 °C – 161 °C)<sup>17</sup>

### Spectral data:

**<sup>1</sup>H NMR:** (400 MHz, DMSO-d<sub>6</sub>) δ: 4.49 (2H, d, *J* = 4 Hz), 7.22 – 7.28 (1H, m), 7.33 (4H, t, *J* = 4 Hz), 7.55 (2H, d, *J* = 12 Hz), 7.92 (2H, d, *J* = 8 Hz), 9.14 (1H, t, *J* = 12 Hz). **<sup>13</sup>C NMR:** (100 MHz, DMSO-d<sub>6</sub>) δ: 43.1, 127.2, 127.7, 128.7, 128.8, 129.6, 133.5, 136.5, 139.9, 165.6.

**GC-MS (EI<sup>+</sup>) *m/z*:** [M]<sup>+</sup> 245.05

### *Transamidation of 4-nitro benzamide with benzyl amine*

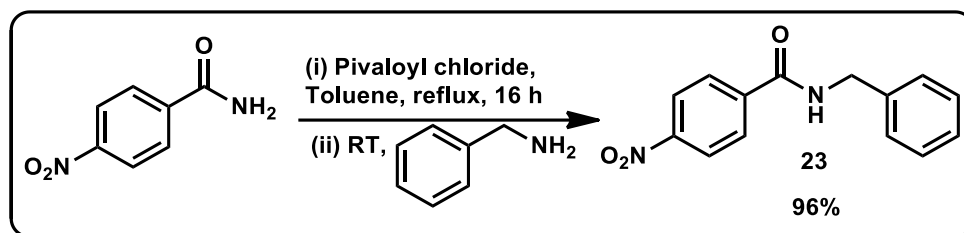

The general procedure-C stated above was followed. 4-Nitrobenzamide (100 mg, 0.60 mmol), pivaloyl chloride (72 mg, 0.60mmol), benzylamine (141 mg, 1.32 mmol). Pure product was obtained after column chromatography (Hexane: EtOAc (80:20)) as yellow solid in 147 mg (96% yield).

### Physical Characteristics:

**Colour and appearance:** Yellow solid

**M.pt:** 140 °C –142 °C (Lit. M.pt = 138 °C -140 °C)<sup>18</sup>

### Spectral data:

**<sup>1</sup>H NMR:** (400 MHz, DMSO-d<sub>6</sub>) δ: 4.52 (2H, d, *J* = 8 Hz), 7.23-7.29 (1H, m), 7.34 (4H, d, *J* = 4 Hz), 8.13 (2H, d, *J* = 8 Hz), 8.33 (2H, d, *J* = 8 Hz), 9.39 (1H, t, *J* = 4 Hz). **<sup>13</sup>C NMR:** (100 MHz, DMSO-d<sub>6</sub>) δ: 43.3, 124.0, 127.3, 127.7, 128.8, 129.2, 139.5, 140.4, 149.5, 165.1. **GC-MS (EI<sup>+</sup>) *m/z*:** [M]<sup>+</sup> 256.10

### *Transamidation of 4-methoxybenzamide with benzyl amine*

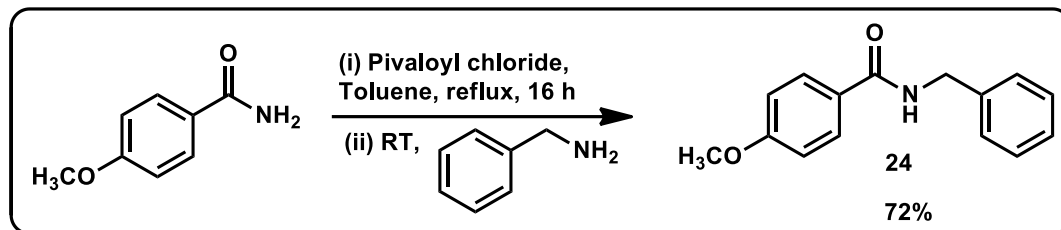

The general procedure-C stated above was followed. 4-Methoxybenzamide (100 mg, 0.66 mmol), pivaloyl chloride (79.5 mg, 0.66mmol), benzylamine (141 mg, 1.32 mmol). Pure product was obtained after column chromatography (Hexane: EtOAc (80:20)) as half-white solid in 114 mg (72% yield).

**Physical Characteristics:**

**Colour and appearance:** Half white solid

**M.pt:** 125 °C –127 °C (Lit. M.pt = 122 °C)<sup>19</sup>

**Spectral data:**

**<sup>1</sup>H NMR:** (400 MHz, DMSO-d<sub>6</sub>) δ: 3.81 (3H, s), 4.47 (2H, d, *J* = 8 Hz), 7.01 (2H, d, *J* = 8 Hz), 7.21-7.27 (1H, m), 7.32 (4H, t, *J* = 8 Hz), 7.88 (2H, d, *J* = 12 Hz), 8.91 (1H, t, *J* = 4 Hz). **<sup>13</sup>C NMR:** (100 MHz, DMSO-d<sub>6</sub>) δ: 42.9, 55.8, 113.9, 126.9, 127.1, 127.6, 128.7, 129.5, 140.3, 162.0, 166.1. **GC-MS (EI<sup>+</sup>) *m/z*:** [M]<sup>+</sup> 241.10

*Transamidation of cinnamic-amide with benzyl amine*

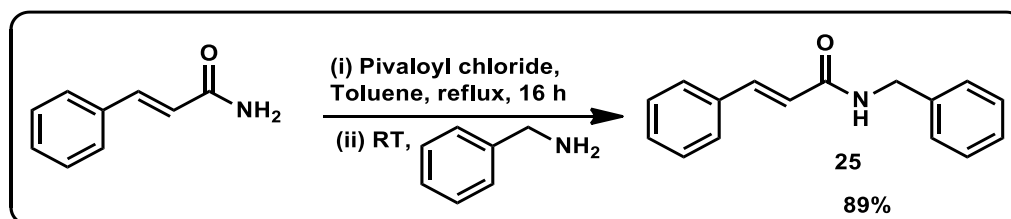

The general procedure-C stated above was followed. Cinnamic amide (100 mg, 0.67 mmol), pivaloyl chloride (80 mg, 0.67mmol), benzylamine (143 mg, 1.34 mmol). Pure product was obtained after column chromatography (Hexane: EtOAc (80:20)) as white solid in 141 mg (89% yield).

**Physical Characteristics:**

**Colour and appearance:** White solid

**M.pt:** 96 °C – 98 °C (Lit. m.pt = 98 °C – 99 °C)<sup>9</sup>

**Spectral data:**

**<sup>1</sup>H NMR** (400 MHz, CDCl<sub>3</sub>) δ: 4.57 (2H, d, *J* = 8 Hz), 6.29 (1H, s), 6.48 (2H, d, *J* = 16 Hz), 7.28-7.37 (8H, m), 7.49-7.51 (2H, m), 7.69 (2H, d, *J* = 16 Hz). **<sup>13</sup>C NMR** (100 MHz, CDCl<sub>3</sub>) δ: 43.8, 120.5, 127.5, 127.8, 128.7, 128.8, 128.9, 129.7, 134.7, 138.2, 141.3, 165.9. **GC-MS (EI<sup>+</sup>)** *m/z*: (M<sup>+</sup>): 237.00.

*Transamidation of piperic-amide with benzyl amine*

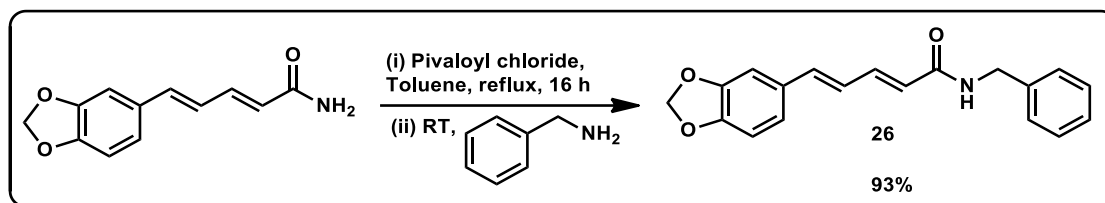

The general procedure-C stated above was followed. piperic amide (100 mg, 0.46 mmol), pivaloyl chloride (55 mg, 0.46mmol), benzylamine (98 mg, 0.92 mmol). Pure product was obtained after column chromatography (Hexane: EtOAc (80:20)) as white solid in 131 mg (93% yield).

**Physical Characteristics:**

**Colour and appearance:** White solid

**M.pt:** 155 °C – 158 °C (Lit. m.pt = 162 °C – 163 °C)<sup>9</sup>

**Spectral data:**

**<sup>1</sup>H NMR** (400 MHz, CDCl<sub>3</sub>) δ: 4.47 (1H, d, *J* = 4 Hz), 5.90 (2H, s), 6.57-6.63 (1H, m), 6.99-6.73 (2H, m), 6.82 (2H, d, *J* = 8 Hz), 7.19-7.29 (6H, m), 7.35 (1H, dd, *J* = 12 Hz, *J* = 8 Hz).

**<sup>13</sup>C NMR** (100 MHz, CDCl<sub>3</sub>) δ: 43.8, 101.3, 105.7, 108.5, 122.4, 122.7, 124.5, 127.6, 127.9, 128.7, 130.7, 138.1, 139.4, 141.8, 148.2, 148.3, 166.1. **GC-MS (EI<sup>+</sup>)** *m/z*: (M<sup>+</sup>): 307.15

**General procedure D:** Transamidation of Secondary amides with alkylamine

To a stirred solution of various amides (1 eq.), triethylamine (2 eq.), in toluene (5 mL) at room temperature, pivaloyl chloride (1 eq.), was added dropwise. After addition the reaction mixture was heated up to 80 °C for 24 h. The reaction mixture was cooled down to room temperature.

To the above synthesized imide in toluene, alkyl amine (2 eq.), was added and stirred at room temperature. Progress of the reaction was monitored by TLC. Starting material consumed in 30 min. After completion, the reaction mixture was washed with 5% HCl solution, 5% NaHCO<sub>3</sub>

solution, water. The organic layer was dried over anhyd. Na<sub>2</sub>SO<sub>4</sub> and concentrated under reduced pressure. Pure product was obtained after column chromatography.

**Table 4:** Transamidation of secondary amides with alkyl amines

| S.NO | Amide | Product | Yield% | Time (min.) |
|------|-------|---------|--------|-------------|
| 1.   |       |         | 85     | 30          |
| 2.   |       |         | 93     | 30          |

*Transamidation of N-ethyl acetamide with benzylamine*

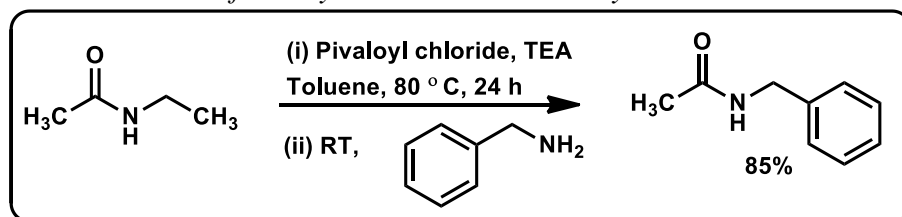

The general procedure-D stated above was followed. *N*-ethyl acetamide (100 mg, 1.14 mmol), pivaloyl chloride (138 mg, 1.14 mmol), triethylamine (230 mg, 2.29 mmol), benzylamine (245 mg, 2.29 mmol). Pure product was obtained after column chromatography white solid in 144 mg (85% yield).

*Transamidation of N-methyl benzamide with benzylamine*

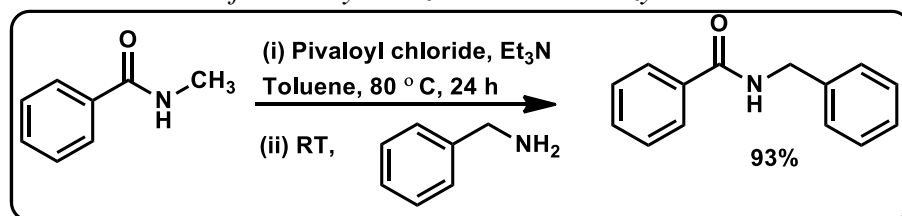

The general procedure-D stated above was followed. *N*-methyl benzamide (100 mg, 0.74 mmol), pivaloyl chloride (89 mg, 0.74 mmol), triethylamine (149 mg, 1.48 mmol), benzylamine (79.1 mg, 1.48 mmol). Pure product was obtained after column chromatography half white solid in 145 mg (93% yield).

### Competitive study- Primary vs secondary amine

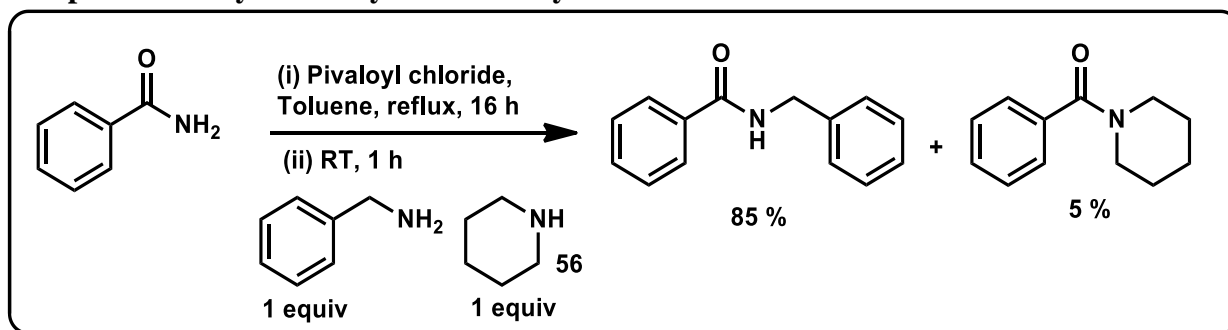

To a stirred solution of benzamide (200 mg, 1.65 mmol, 1 eq.), in toluene at room temperature, pivaloyl chloride (198 mg, 1.65 mmol, 1 eq.), was added dropwise. After addition, the reaction mixture was refluxed for 16 h. The reaction mixture was cooled down to room temperature. Without further purification the crude product was taken to next step.

To the above synthesized imide in toluene, an equimolar mixture of benzylamine (176 mg, 1.65 mmol, 1 equiv.) and piperidine (140 mg, 1.65 mmol, 1 equiv) was added and stirred at room temperature. Progress of the reaction was monitored by TLC. After completion, the reaction mixture was washed with 5% HCl solution, 5% NaHCO<sub>3</sub> solution and water. The organic layer was dried over anhyd. Na<sub>2</sub>SO<sub>4</sub> and concentrated under reduced pressure. The crude mass was column purified to get pure benzyl amine transamidation product in 295 mg (85%) and piperidine transamidation product in 16 mg (5%).

### Synthesis of *N*-isobutyrylbenzamide

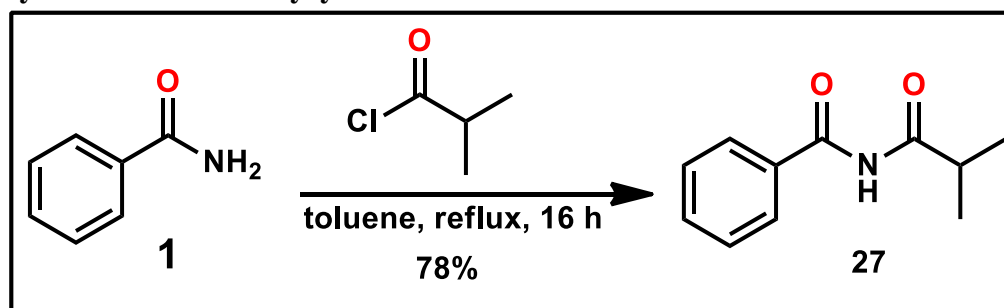



To a stirred solution of benzamide (500 mg, 4.13 mmol), in 15 mL of toluene at room temperature, pivaloyl chloride (497 mg, 4.13mmol) was added dropwise. After addition, the reaction mixture was refluxed for 16 h. Progress of the reaction was monitored by TLC [hexane-EtOAc (7:3)]. After completion, the reaction mixture was washed with 5% NaHCO<sub>3</sub> solution (2 x 50 mL) and water (1 x 50 mL). The organic layer was dried over anhyd. Na<sub>2</sub>SO<sub>4</sub> and concentrated under reduced pressure. The obtained crude mixture was washed with hexane (10 mL) to get pure product as half-white solid in 527 mg (67 % yield).

**Physical Characteristics: Colour and appearance:** White solid

**M.pt:** 152 °C – 153 °C (Lit. m.pt = 151 °C – 152 °C)<sup>1</sup>

**H NMR:** (400 MHz, DMSO-d<sub>6</sub>): δ: 1.11 (6H, d, *J* = 8 Hz), 3.05- 3.15 (1H, m), 7.51 (2H, *t*, *J* = 8 Hz), 7.62 (1H, *t*, *J* = 8 Hz), 7.88 (2H, d, *J* = 8 Hz), 10.86 (1H, s). **<sup>13</sup>C NMR:** (100 MHz, DMSO-d<sub>6</sub>): δ: 19.3, 35.0, 128.7, 128.8, 133.0, 134.1, 166.9, 178.3. **GC-MS (EI<sup>+</sup>) *m/z*:** [M]<sup>+</sup> 191.10.

#### Transamidation of *N*-isobutyrylbenzamide with benzylamine

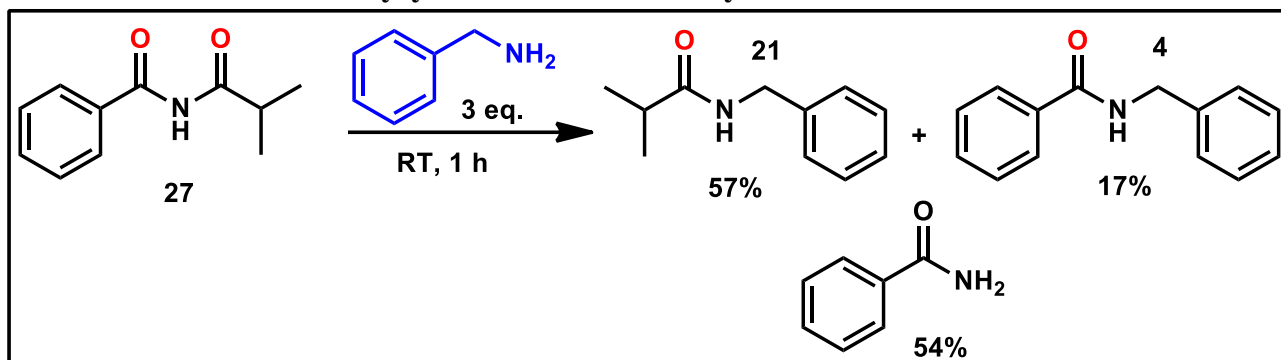

In oven dried round bottom flask *N*-isobutyrylbenzamide (200 mg, 1.04mmol) was taken in which benzylamine (333.8 mg, 3.12 mmol) was added and stirred at room temperature for 1 h. Progress of the reaction was monitored by TLC [hexane-EtOAc (7:3)]. After completion, the reaction mixture was washed with 5% HCl solution (2 x 25 mL), 5% NaHCO<sub>3</sub> solution (2 x 25 mL) and water (1 x 25 mL). The organic layer was dried over anhyd. Na<sub>2</sub>SO<sub>4</sub> and concentrated under reduced pressure. Pure product was obtained after column chromatography as white solid **60** (105mg, 57%) and white solid **61** (37 mg, 17%).

**26-Physical Characteristics: Colour and appearance:** White solid

**M.pt:** 82 °C – 85 °C (Lit. m.pt = 84 °C – 86 °C)<sup>37</sup>

**<sup>1</sup>H NMR:** (400 MHz, CDCl<sub>3</sub>) δ: 1.11 (3H, d, *J* = 4 Hz), 2.29-2.36 (1H, m), 3.35 (2H, d, *J* = 8 Hz), 5.86 (1H, s, br), 7.18 – 7.21(3H, m), 7.25 (2H, t, *J* = 8 Hz). **<sup>13</sup>C NMR:** (100 MHz CDCl<sub>3</sub>) δ: 19.6, 35.6, 43.5, 127.4, 127.7, 128.7, 138.4, 177.0. **GC-MS (EI<sup>+</sup>) *m/z*:** (M<sup>+</sup>): 178.10.

#### **4-Physical Characteristics:**

**Colour and appearance:** Half-white solid

**M.pt:** 103 °C – 105 °C (Lit. m.pt = 104 °C – 105 °C)<sup>8</sup>

#### **Spectral data:**

**<sup>1</sup>H NMR** (400 MHz, CDCl<sub>3</sub>) δ: 4.65 (2H, d, *J* = 8 Hz), 7.29-7.36 (4H, m), 7.43 (2H, t, *J* = 8 Hz), 7.48-7.52 (1H, m), 7.79 (2H, d, *J* = 8 Hz). **<sup>13</sup>C NMR** (100 MHz, CDCl<sub>3</sub>) δ: 44.1, 126.7, 126.9, 127.6, 127.9, 128.6, 128.8, 131.5, 134.3, 138.1, 167.3. **GC-MS (EI<sup>+</sup>) *m/z*:** (M<sup>+</sup>): 211.00.

#### **Synthesis of moclobemide**

*Transamidation of 4-chloro benzamide with 4-(2-aminoethyl) morpholine*

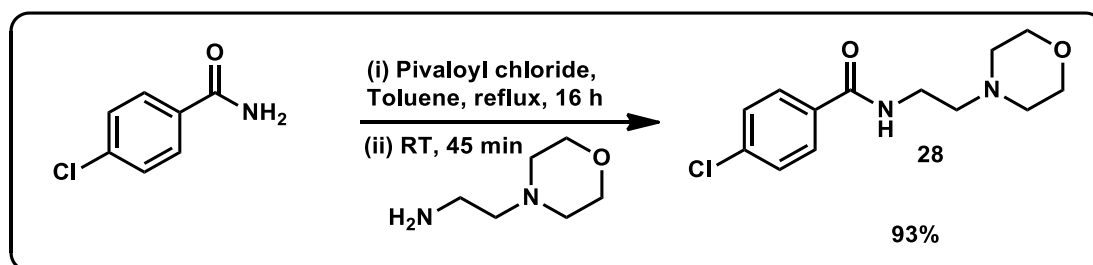

The general procedure-A stated above was followed. 4-Chlorobenzamide (100 mg, 0.64 mmol), pivaloyl chloride (77 mg, 0.64 mmol), 4-(2-aminoethyl) morpholine (166 mg, 1.28 mmol). Pure product was obtained after column chromatography (Hexane: EtOAc (80:20)) as yellow solid in 159 mg (93% yield).

#### **Physical Characteristics:**

**Colour and appearance:** Yellow solid

**M.pt:** 132 °C – 133 °C (Lit. m.pt = 136.1 °C – 136.7 °C)<sup>35</sup>

#### **Spectral data:**

**<sup>1</sup>H NMR:** (400 MHz, CDCl<sub>3</sub>) δ: 2.47 (4H, s), 2.56 (2H, t, *J* = 8 Hz), 3.47-3.51 (2H, m), 3.67 (4H, t, *J* = 8 Hz), 6.82 (1H, s), 7.34 (2H, d, *J* = 8 Hz), 7.66 (2H, d, *J* = 8 Hz). **<sup>13</sup>C NMR:** (100 MHz, CDCl<sub>3</sub>) δ: 36.0, 53.3, 56.9, 66.8, 128.4, 128.8, 132.9, 137.6, 166.3. **GC-MS (EI<sup>+</sup>) *m/z*:** [M]<sup>+</sup> 268.15

## Synthesis of Natural product

### Synthesis of Piperlotine-A

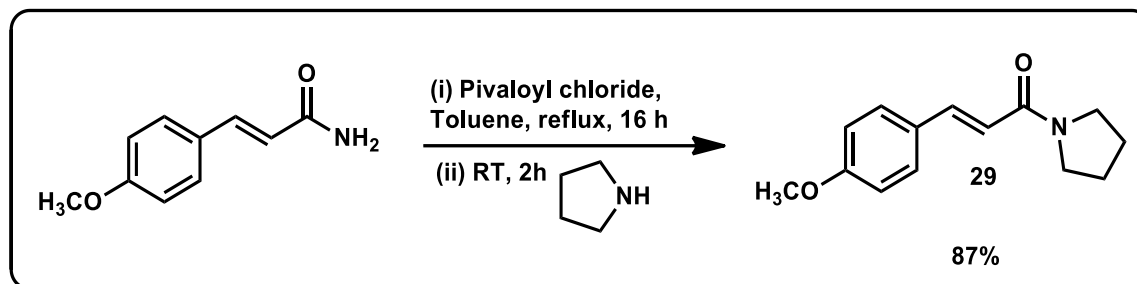

The general procedure-A stated above was followed. 4-methoxy cinnamicamide (100 mg, 0.56), pivaloyl chloride (67 mg, 0.56 mmol), pyrrolidine (80 mg, 1.12 mmol). Pure product was obtained after column chromatography (Hexane: EtOAc (80:20)) as Light brown Solid in 112 mg (87% yield).

### Physical Characteristics:

**Colour and appearance:** Light brown Solid

**M.pt:** 114 °C – 115 °C (Lit. m.pt = 115 °C – 116 °C)<sup>36</sup>

### Spectral data:

**<sup>1</sup>H NMR:** (400 MHz, CDCl<sub>3</sub>) δ: 1.93 (4H, s), 3.58 (4H, d, *J* = 4 Hz), 3.81 (3H, s), 6.59 (1H, d, *J* = 16 Hz), 6.88 (2H, d, *J* = 8 Hz), 7.47 (2H, d, *J* = 8 Hz), 7.65 (1H, d, *J* = 16 Hz). **<sup>13</sup>C NMR:** (100 MHz, CDCl<sub>3</sub>) δ: 55.3, 114.2, 116.3, 128.0, 129.3, 141.4, 160.8, 165.0. **GC-MS (EI<sup>+</sup>) *m/z*:** [M]<sup>+</sup> 231.10

### Synthesis of Piperylin

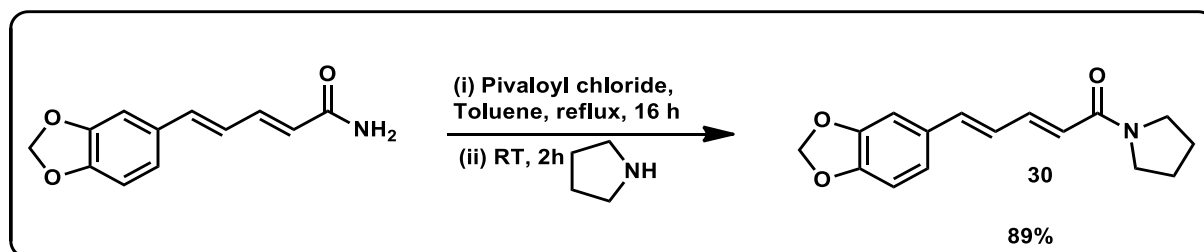

General procedure-A stated above was followed. Piperic amide (100 mg, 0.46 mmol), pivaloyl chloride (55 mg, 0.46 mmol), pyrrolidine (65 mg, 0.92 mmol). Pure product was obtained after column chromatography (Hexane: EtOAc (80:20)) as white solid in 110 mg (89% yield).

### Physical Characteristics:

**Colour and appearance:** White solid

**M.pt:** 140 °C – 142 °C (Lit. m.pt = 145 °C – 147 °C)<sup>9</sup>

### **Spectral data:**

**<sup>1</sup>H NMR** (400 MHz, CDCl<sub>3</sub>) δ: 1.94 (4H, br, s), 3.56-3.59 (4H, m), 5.97 (2H, s), 6.24 (2H, d, *J* = 16 Hz), 6.70-6.84 (3H, m), 6.90 (2H, d, *J* = 8 Hz), 7.52 (2H, dd, *J* = 16 Hz, *J* = 4 Hz).

**<sup>13</sup>C NMR** (100 MHz, CDCl<sub>3</sub>) δ: 46.5, 101.3, 105.7, 108.5, 120.5, 122.8, 125.0, 130.9, 139.4, 142.8, 148.2, 148.3, 165.1. **GC-MS (EI<sup>+</sup>) *m/z***: (M<sup>+</sup>): 271.20.

### **Reference**

- (1) Mei, C.; Hu, Y.; Lu, W. Visible-Light-Driven Oxidation of N-Alkylamides to Imides Using Oxone/H<sub>2</sub>O and Catalytic KBr. *Synthesis* **2018**, *50* (15), 2999–3005. <https://doi.org/10.1055/s-0036-1591575>.
- (2) Sanz Sharley, D. D.; Williams, J. M. J. A Selective Hydration of Nitriles Catalysed by a Pd(OAc)<sub>2</sub>-Based System in Water. *Tetrahedron Letters* **2017**, *58* (43), 4090–4093. <https://doi.org/10.1016/j.tetlet.2017.09.034>.
- (3) Rezaei, M.; Amani, K.; Darvishi, K. One-Pot Green Catalytic Synthesis of Primary Amides in Aqueous Medium by CuII–Immobilized Silica–Based Magnetic Retrieval Nanocatalyst. *Catalysis Communications* **2017**, *91*, 38–42. <https://doi.org/10.1016/j.catcom.2016.12.004>.
- (4) Poeschl, A.; Mountford, D. M. A Facile Manganese Dioxide Mediated Oxidation of Primary Benzylamines to Benzamides. *Org. Biomol. Chem.* **2014**, *12* (36), 7150–7158. <https://doi.org/10.1039/C4OB01166J>.
- (5) Sobhani, S.; Falatoni, Z. M.; Asadi, S.; Honarmand, M. Palladium-Schiff Base Complex Immobilized Covalently on Magnetic Nanoparticles as an Efficient and Recyclable Catalyst for Heck and Suzuki Cross-Coupling Reactions. *Catal Lett* **2016**, *146* (1), 255–268. <https://doi.org/10.1007/s10562-015-1636-y>.
- (6) Azadi, R.; Motamedpoor, Z. Direct and Facile Synthesis of Primary Amides from Carboxylic Acids via Acyl Isocyanate Intermediates Using Mukaiyama Reagent. *LOC* **2018**, *15* (9), 801–804. <https://doi.org/10.2174/1570178615666180212152643>.
- (7) Wang, Y.; Wu, Z.; Li, Q.; Zhu, B.; Yu, L. Ruthenium-Catalyzed Oxidative Decyanative Cross-Coupling of Acetonitriles with Amines in Air: A General Access to Primary to Tertiary Amides under Mild Conditions. *Catal. Sci. Technol.* **2017**, *7* (17), 3747–3757. <https://doi.org/10.1039/C7CY00761B>.
- (8) Wang, X.; Widenhoefer, R. A. Platinum-Catalyzed Intermolecular Hydroamination of Unactivated Olefins with Carboxamides. *Organometallics* **2004**, *23* (8), 1649–1651. <https://doi.org/10.1021/om0498549>.
- (9) Saravana Kumar Rajendran; Muthuraman Subramani,. Mild, Metal-Free and Protection-Free Transamidation of N-Acyl-2-Piperidones to Amino Acids, Amino Alcohols and Aliphatic Amines and Esterification of N-Acyl-2-Piperidones. *Eur. J. Org. Chem.* **2019**, 3677–3686.
- (10) Kang, S.; La, M. T.; Kim, H.-K. Convenient Metal-Free Direct Oxidative Amidation of Aldehyde Using Dibromoisocyanuric Acid under Mild Conditions. *Tetrahedron Letters* **2018**, *59* (39), 3541–3546. <https://doi.org/10.1016/j.tetlet.2018.08.026>.

- (11) Ramkumar, R.; Chandrasekaran, S. Catalyst-Free, Metal-Free, and Chemoselective Transamidation of Activated Secondary Amides. *Synthesis* **2018**, *51*. <https://doi.org/10.1055/s-0037-1610664>.
- (12) Huy, P. H.; Motsch, S.; Kappler, S. M. Formamides as Lewis Base Catalysts in S<sub>N</sub> Reactions-Efficient Transformation of Alcohols into Chlorides, Amines, and Ethers. *Angew. Chem. Int. Ed.* **2016**, *55* (34), 10145–10149. <https://doi.org/10.1002/anie.201604921>.
- (13) Tariq, M. U.; Moran, W. J. Spirooxazoline Synthesis by an Oxidative Dearomatizing Cyclization. *European Journal of Organic Chemistry* **2020**, *2020* (32), 5153–5160. <https://doi.org/10.1002/ejoc.202000840>.
- (14) Wang, C.; Huang, L.; Lu, M.; Zhao, B.; Wang, Y.; Zhang, Y.; Shen, Q.; Yao, Y. Anionic Phenoxy-Amido Rare-Earth Complexes as Efficient Catalysts for Amidation of Aldehydes with Amines. *RSC Adv.* **2015**, *5* (115), 94768–94775. <https://doi.org/10.1039/C5RA20285J>.
- (15) Dalidovich, T.; Mishra, K. A.; Shalima, T.; Kudrjašova, M.; Kananovich, D. G.; Aav, R. Mechanochemical Synthesis of Amides with Uronium-Based Coupling Reagents: A Method for Hexa-Amidation of Biotin[6]Uril. *ACS Sustainable Chem. Eng.* **2020**, *8* (41), 15703–15715. <https://doi.org/10.1021/acssuschemeng.0c05558>.
- (16) Nagarajan, S.; Shanmugavelan, P.; Sathishkumar, M.; Priyadharshini, N.; Sudakar, P.; Ponnuswamy, A. Chemoselectivity in Coupling of Azides with Thioacids in Solution-Phase and Solvent-Free Conditions. *Synthetic Communications* **2013**, *43* (5), 668–680. <https://doi.org/10.1080/00397911.2011.606043>.
- (17) Patel, K. P.; Gayakwad, E. M.; Shankarling, G. S. Graphene Oxide: A Convenient Metal-Free Carbocatalyst for Facilitating Amidation of Esters with Amines. *New J. Chem.* **2020**, *44* (6), 2661–2668. <https://doi.org/10.1039/C9NJ05283F>.
- (18) Zarei, Z.; Akhlaghinia, B. Ce(III) Immobilised on Aminated Epichlorohydrin-Activated Agarose Matrix — “Green” and Efficient Catalyst for Transamidation of Carboxamides. *Chem. Pap.* **2015**, *69* (11), 1421–1437. <https://doi.org/10.1515/chempap-2015-0168>.
- (19) Sureshbabu, P.; Azeez, S.; Chaudhary, P.; Kandasamy, J. Tert-Butyl Nitrite Promoted Transamidation of Secondary Amides under Metal and Catalyst Free Conditions. *Org. Biomol. Chem.* **2019**, *17* (4), 845–850. <https://doi.org/10.1039/C8OB03010C>.
- (20) Caiuby, C. A. D.; de Jesus, M. P.; Burtoloso, A. C. B.  $\alpha$ -Imino Iridium Carbenes from Imidoyl Sulfoxonium Ylides: Application in the One-Step Synthesis of Indoles. *J. Org. Chem.* **2020**, *85* (11), 7433–7445. <https://doi.org/10.1021/acs.joc.0c00833>.
- (21) Li, C.; Wang, M.; Lu, X.; Zhang, L.; Jiang, J.; Zhang, L. Reusable Brønsted Acidic Ionic Liquid Efficiently Catalyzed N-Formylation and N-Acylation of Amines. *ACS Sustainable Chem. Eng.* **2020**, *8* (11), 4353–4361. <https://doi.org/10.1021/acssuschemeng.9b06591>.
- (22) Mishra, A.; Singh, S.; Srivastava, V. Cerium Catalyzed Transamidation of Secondary Amides under Ultrasound Irradiation: A Breakthrough in Organic Synthesis. *Asian Journal of Organic Chemistry* **2018**, *7* (8), 1600–1604. <https://doi.org/10.1002/ajoc.201800258>.
- (23) Won, J.-E.; Kim, H.-K.; Kim, J.-J.; Yim, H.-S.; Kim, M.-J.; Kang, S.-B.; Chung, H.-A.; Lee, S.-G.; Yoon, Y.-J. Effective Esterification of Carboxylic Acids Using (6-Oxo-6H-Pyridazin-1-Yl)Phosphoric Acid Diethyl Ester as Novel Coupling Agents. *Tetrahedron* **2007**, *63* (51), 12720–12730. <https://doi.org/10.1016/j.tet.2007.10.011>.

- (24) Sahu, P. K.; Sahu, P. K.; Gupta, R.; Messali, M.; Almutairi, S. M.; Sahu, P. L.; Agarwal, D. D. Sustainable Synthesis and Characterization of Ni–Al-Containing Double-Layered Nanocatalysts and Their Catalytic Activity. *ACS Omega* **2018**, *3* (12), 18976–18983. <https://doi.org/10.1021/acsomega.8b01994>.
- (25) Rzhnevskiy, S. A.; Ageshina, A. A.; Chesnokov, G. A.; Griбанov, P. S.; Topchiy, M. A.; Nechaev, M. S.; Asachenko, A. F. Solvent- and Transition Metal-Free Amide Synthesis from Phenyl Esters and Aryl Amines. *RSC Adv.* **2019**, *9* (3), 1536–1540. <https://doi.org/10.1039/C8RA10040C>.
- (26) Li, J.-S.; Xue, Y.; Li, P.-Y.; Li, Z.-W.; Lu, C.-H.; Liu, W.-D.; Pang, H.-L.; Liu, D.-H.; Lin, M.-S.; Luo, B.-B.; Jiang, W. A Facile Copper Salts-Mediated Conversion of Thioamides to N-Thioacylamidines, Amidines, and Amides. *Res Chem Intermed* **2015**, *41* (4), 2235–2247. <https://doi.org/10.1007/s11164-013-1341-7>.
- (27) Otsuka, R.; Maruhashi, K.; Ohwada, T. Latent Brønsted Base Solvent-Assisted Amide Formation from Amines and Acid Chlorides. *Synthesis* **2018**, *50* (10), 2041–2057. <https://doi.org/10.1055/s-0037-1609342>.
- (28) Das, S.; Ray, S.; Ghosh, A. B.; Samanta, P. K.; Samanta, S.; Adhikary, B.; Biswas, P. Visible Light Driven Amide Synthesis in Water at Room Temperature from Thioacid and Amine Using CdS Nanoparticles as Heterogeneous Photocatalyst. *Applied Organometallic Chemistry* **2018**, *32* (3), e4199. <https://doi.org/10.1002/aoc.4199>.
- (29) Costa, P. C. S.; Barsottini, M. R. O.; Vieira, M. L. L.; Pires, B. A.; Evangelista, J. S.; Zeri, A. C. M.; Nascimento, A. F. Z.; Silva, J. S.; Carazzolle, M. F.; Pereira, G. A. G.; Sforça, M. L.; Miranda, P. C. M. L.; Rocco, S. A. N-Phenylbenzamide Derivatives as Alternative Oxidase Inhibitors: Synthesis, Molecular Properties, 1H-STD NMR, and QSAR. *Journal of Molecular Structure* **2020**, *1208*, 127903. <https://doi.org/10.1016/j.molstruc.2020.127903>.
- (30) Gergely, M.; Kollár, L. Aminothiazoles and Aminothiadiazoles as Nucleophiles in Aminocarbonylation of Iodobenzene Derivatives. *Tetrahedron* **2018**, *74* (16), 2030–2040. <https://doi.org/10.1016/j.tet.2018.03.007>.
- (31) Su, W. K.; Zhang, Y.; Li, J. J.; Li, P. A SIMPLE AND EFFICIENT PROCEDURE FOR THE BECKMANN REARRANGEMENT OF OXIME USING Bis-(TRICHLOROMETHYL) CARBONATE/DMF. *Organic Preparations and Procedures International* **2008**, *40* (6), 543–550. <https://doi.org/10.1080/00304940809458118>.
- (32) Nammalwar, B.; Muddala, N. P.; Watts, F. M.; Bunce, R. A. Efficient Conversion of Acids and Esters to Amides and Transamidation of Primary Amides Using OSU-6. *Tetrahedron* **2015**, *71* (48), 9101–9111. <https://doi.org/10.1016/j.tet.2015.10.016>.
- (33) Gao, Y.; Liu, J.; Li, Z.; Guo, T.; Xu, S.; Zhu, H.; Wei, F.; Chen, S.; Gebru, H.; Guo, K. Dichloroimidazolidinedione-Activated Beckmann Rearrangement of Ketoximes for Accessing Amides and Lactams. *J. Org. Chem.* **2018**, *83* (4), 2040–2049. <https://doi.org/10.1021/acs.joc.7b02983>.
- (34) Kosal, A. D.; Wilson, E. E.; Ashfeld, B. L. Phosphine-Based Redox Catalysis in the Direct Traceless Staudinger Ligation of Carboxylic Acids and Azides. *Angewandte Chemie International Edition* **2012**, *51* (48), 12036–12040. <https://doi.org/10.1002/anie.201206533>.
- (35) Braddock, D. C.; Lickiss, P. D.; Rowley, B. C.; Pugh, D.; Purnomo, T.; Santhakumar, G.; Fussell, S. J. Tetramethyl Orthosilicate (TMOS) as a Reagent for Direct Amidation of

Carboxylic Acids. *Org. Lett.* **2018**, *20* (4), 950–953.  
<https://doi.org/10.1021/acs.orglett.7b03841>.

- (36) Ramírez-Marroquín, O. A.; Manzano-Pérez, F.; López-Torres, A.; Hernández-López, A.; Cortés-Pacheco, A.; Reyes-González, M. A. First Mechanosynthesis of Piperlotines A, C, and Derivatives through Solvent-Free Horner-Wadsworth-Emmons Reaction. *Synthetic Communications* **2019**, *49* (2), 244–255. <https://doi.org/10.1080/00397911.2018.1550204>.

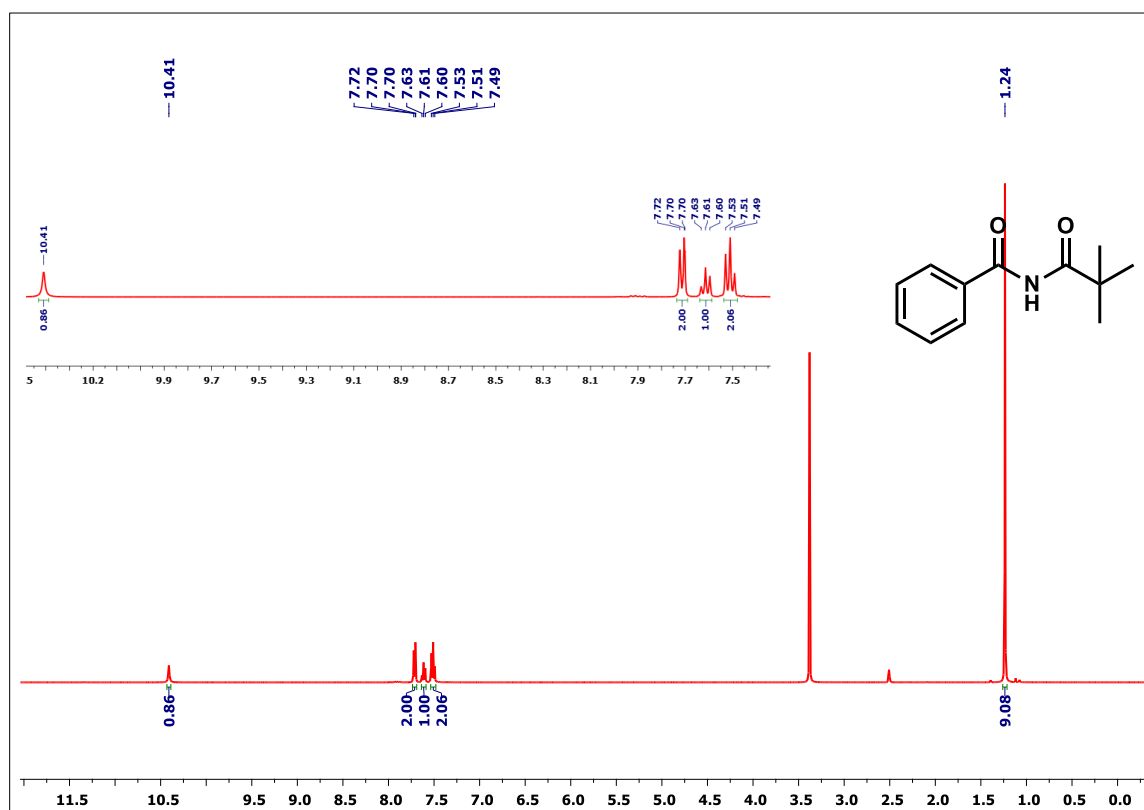

**Figure S2:** 400 MHz <sup>1</sup>H NMR spectrum of *N*-pivaloyl benzamide **1** in DMSO-d<sub>6</sub>

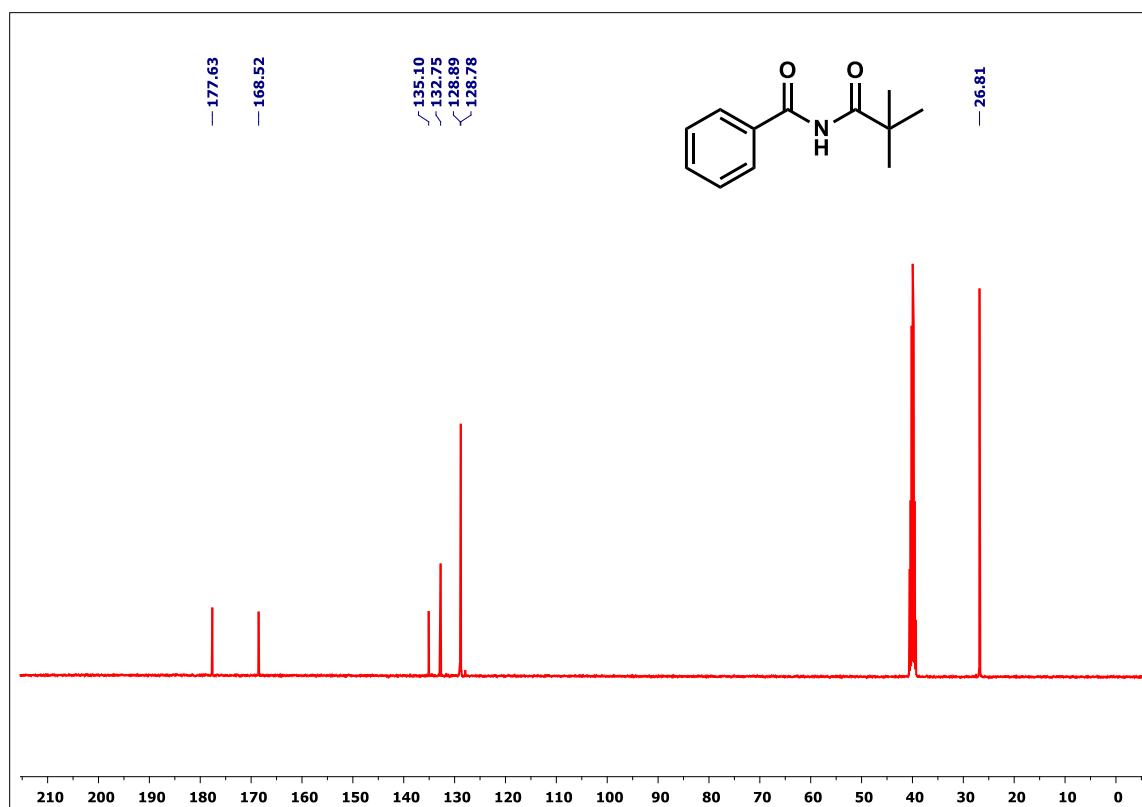

Figure S3: 100 MHz  $^{13}\text{C}$  NMR spectrum of *N*-pivaloyl benzamide **1** in DMSO- $d_6$

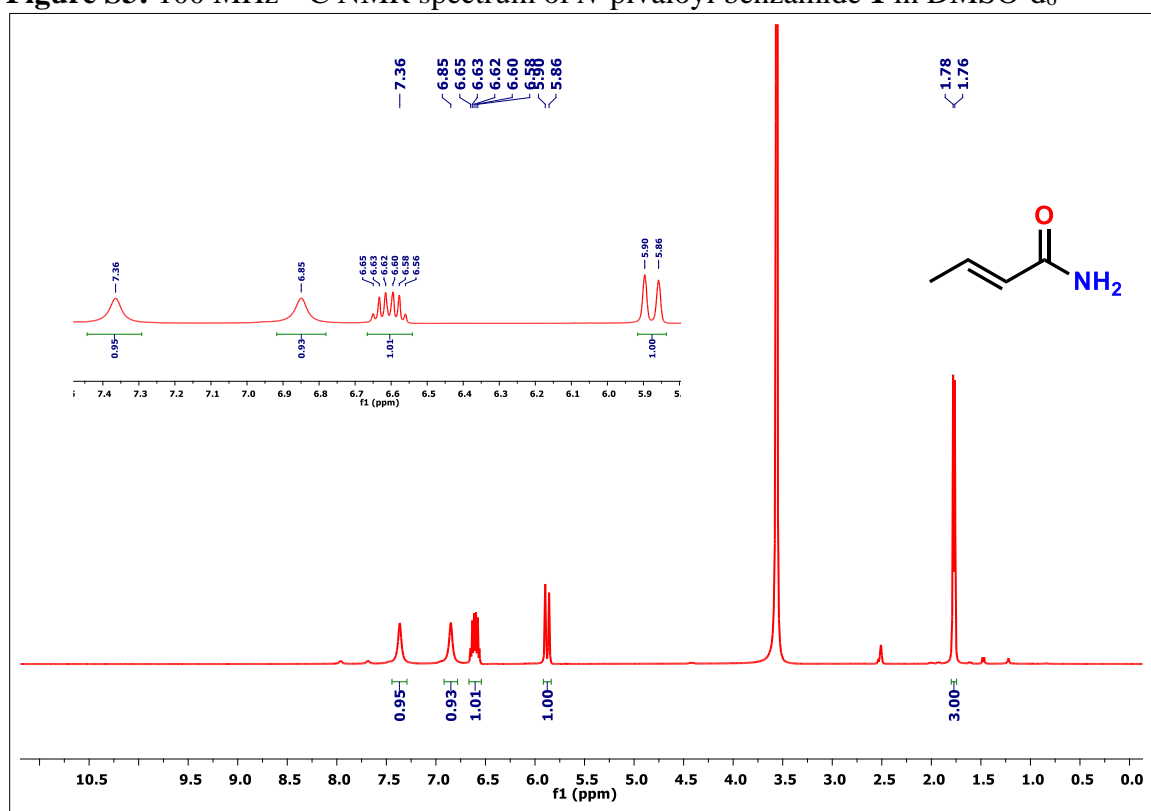

Figure S4: 400 MHz  $^1\text{H}$  NMR spectrum of crotonamide in DMSO- $d_6$



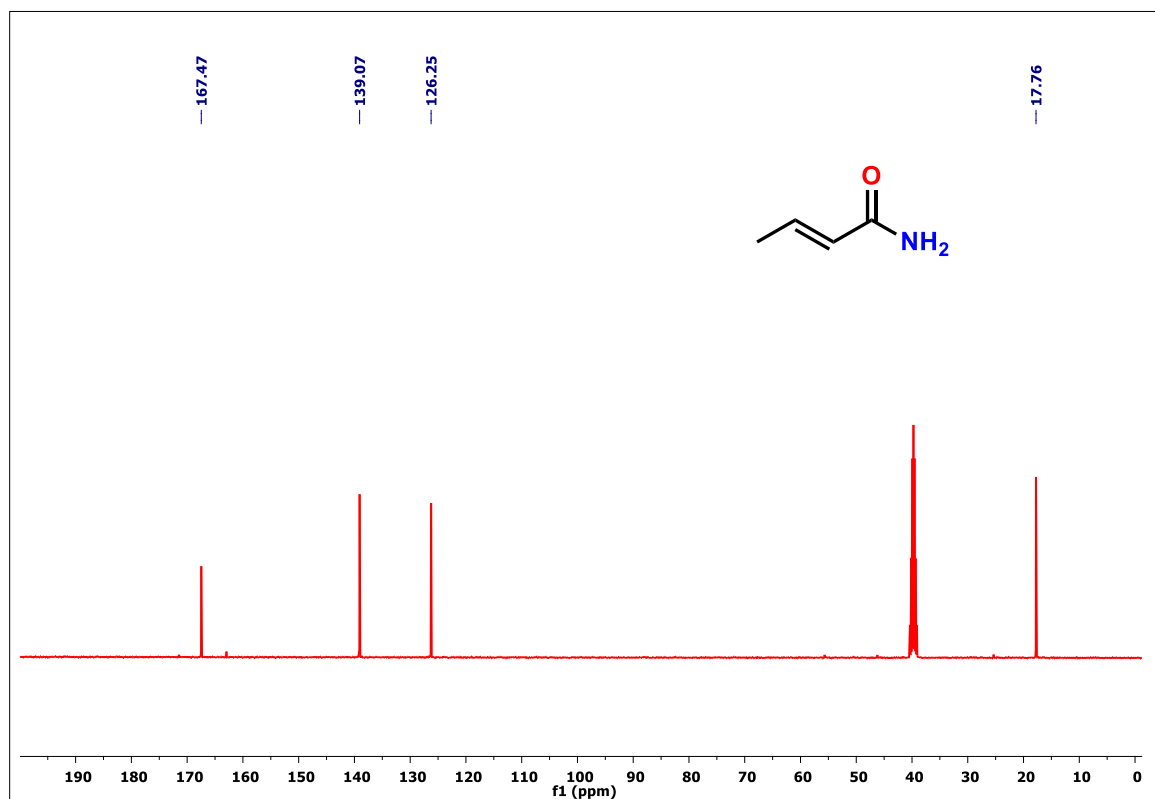

Figure S5: 400 MHz  $^1\text{H}$  NMR spectrum of crotonicamide in  $\text{DMSO-d}_6$

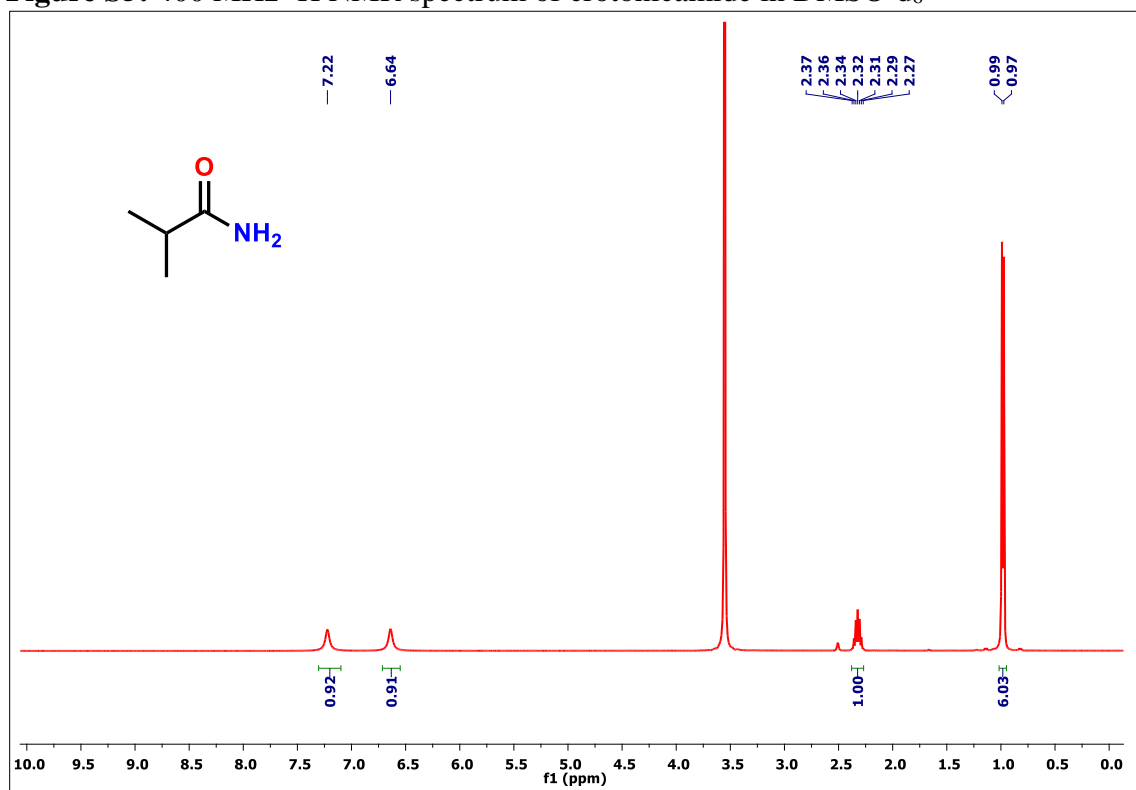

Figure S6: 400 MHz  $^1\text{H}$  NMR spectrum of isobutyricamide in  $\text{DMSO-d}_6$

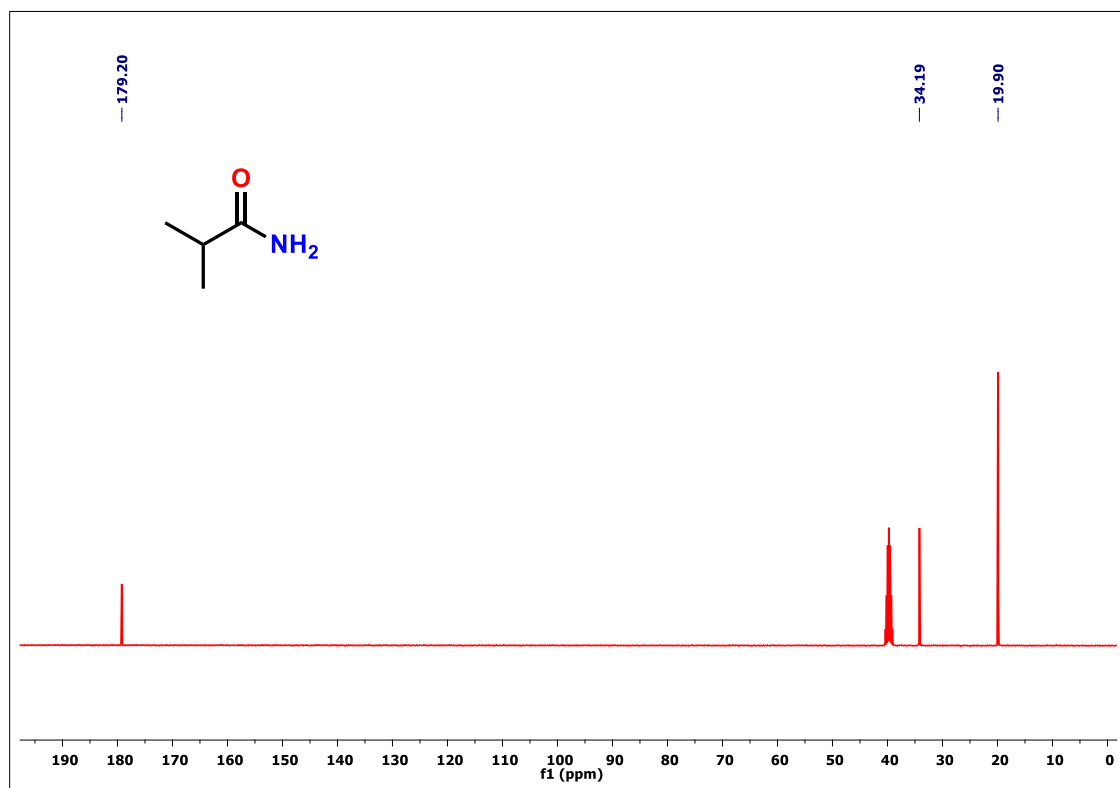

Figure S7: 400 MHz  $^1\text{H}$  NMR spectrum of isobutyric amide in  $\text{DMSO-d}_6$

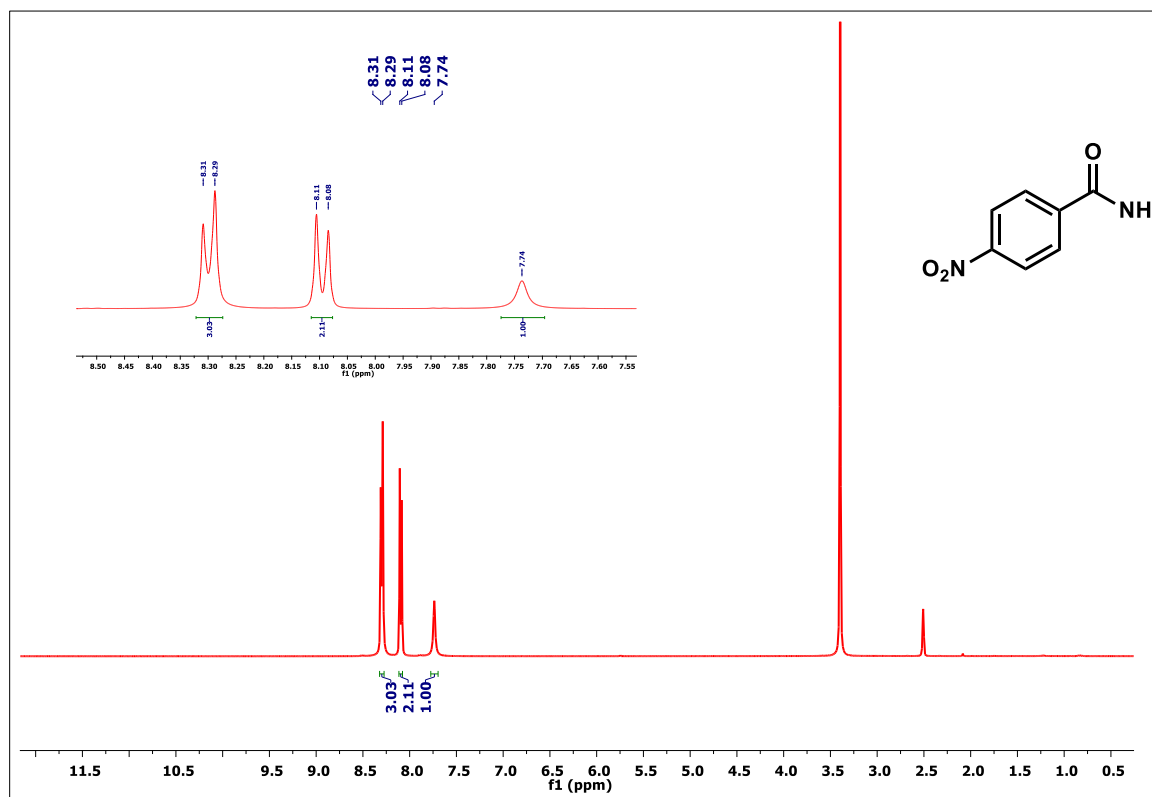

**Figure S8:** 400 MHz  $^1\text{H}$  NMR spectrum of 4-nitro benzamide in DMSO- $\text{d}_6$

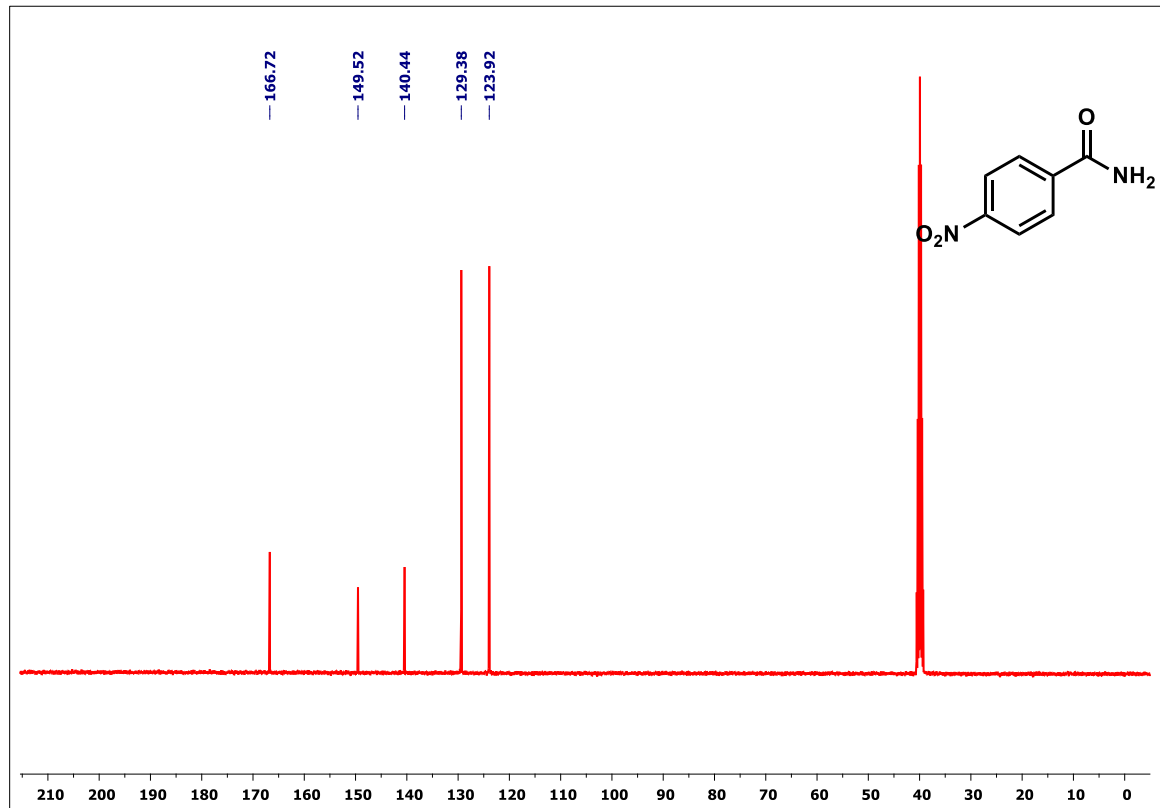

**Figure S9:** 100 MHz  $^{13}\text{C}$  NMR spectrum of 4- nitro benzamide in DMSO- $\text{d}_6$

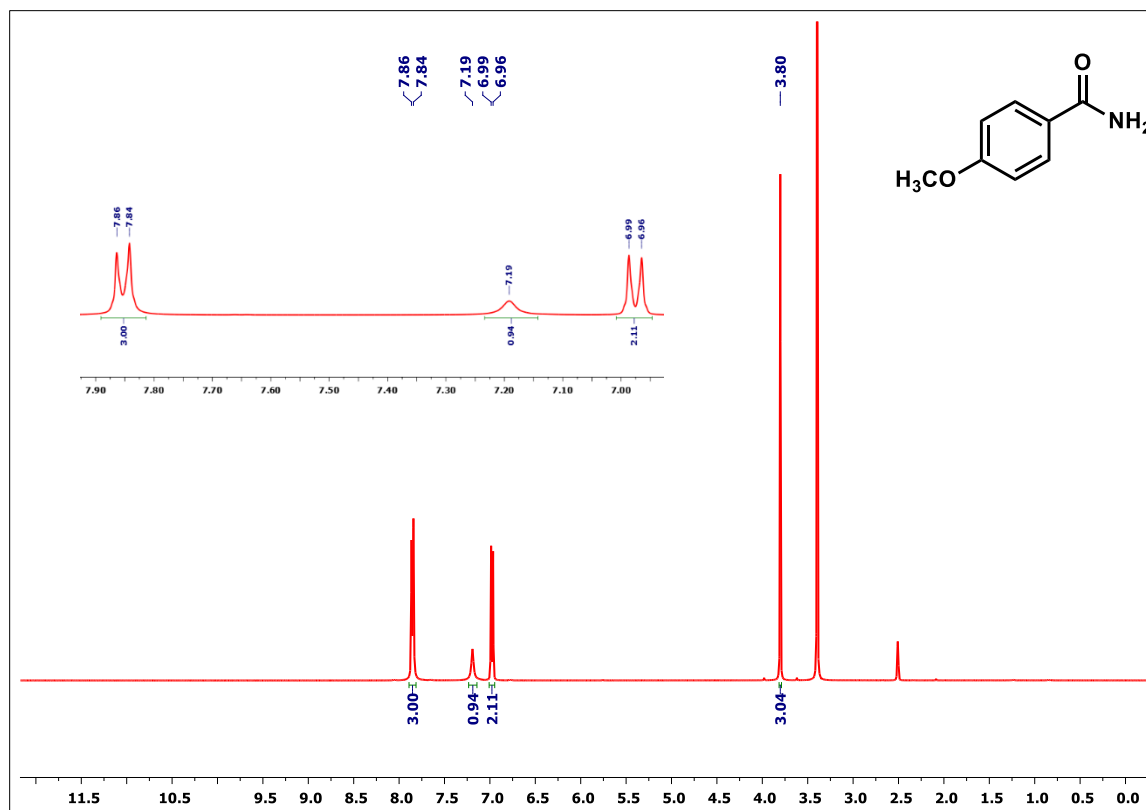

**Figure S10:** 400 MHz  $^1\text{H}$  NMR spectrum of 4-methoxy benzamide in  $\text{DMSO-d}_6$

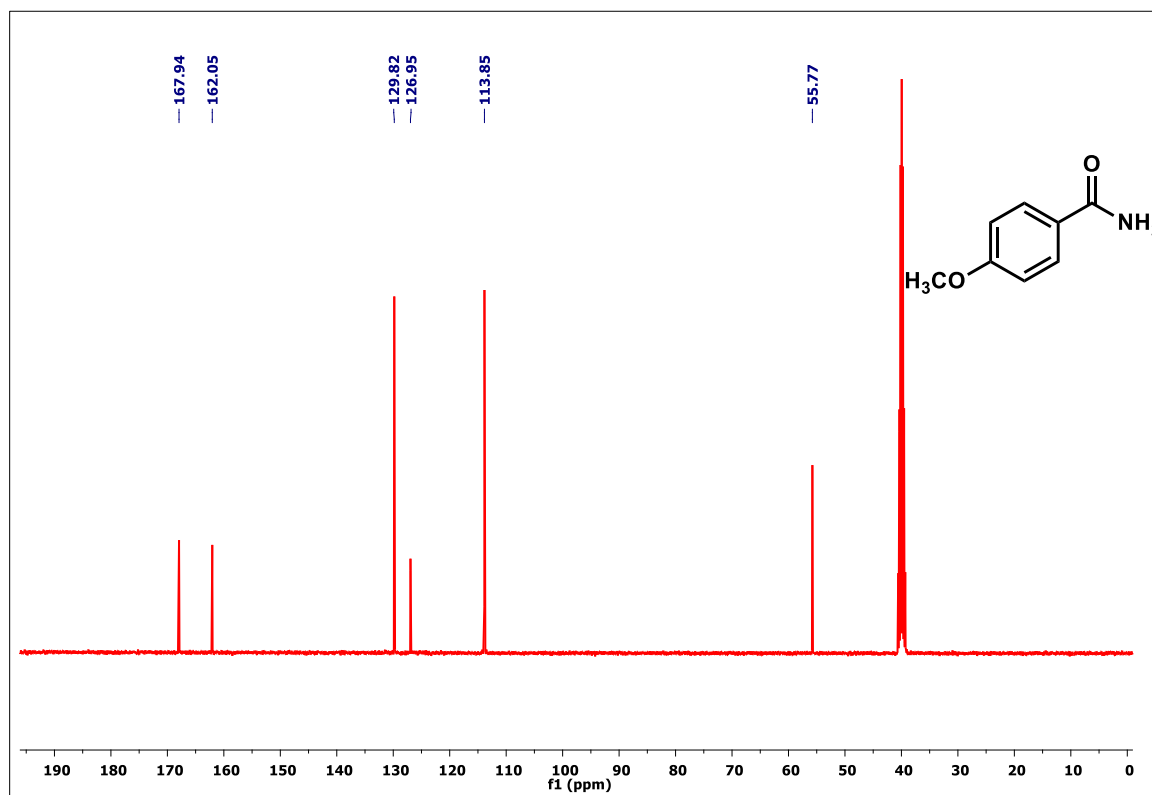

**Figure S11:** 100 MHz  $^{13}\text{C}$  NMR spectrum of 4-methoxy benzamide in  $\text{DMSO-d}_6$

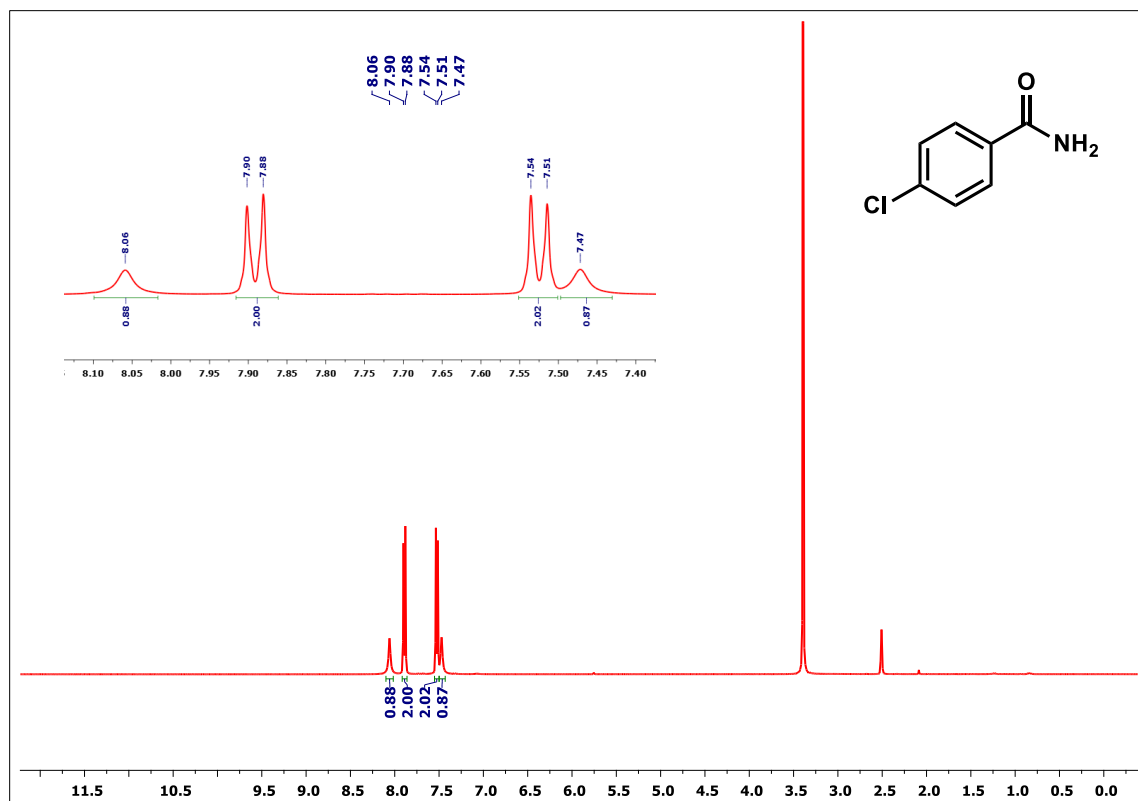

**Figure S12:** 400 MHz  $^1\text{H}$  NMR spectrum of 4-chloro benzamide in  $\text{DMSO-d}_6$

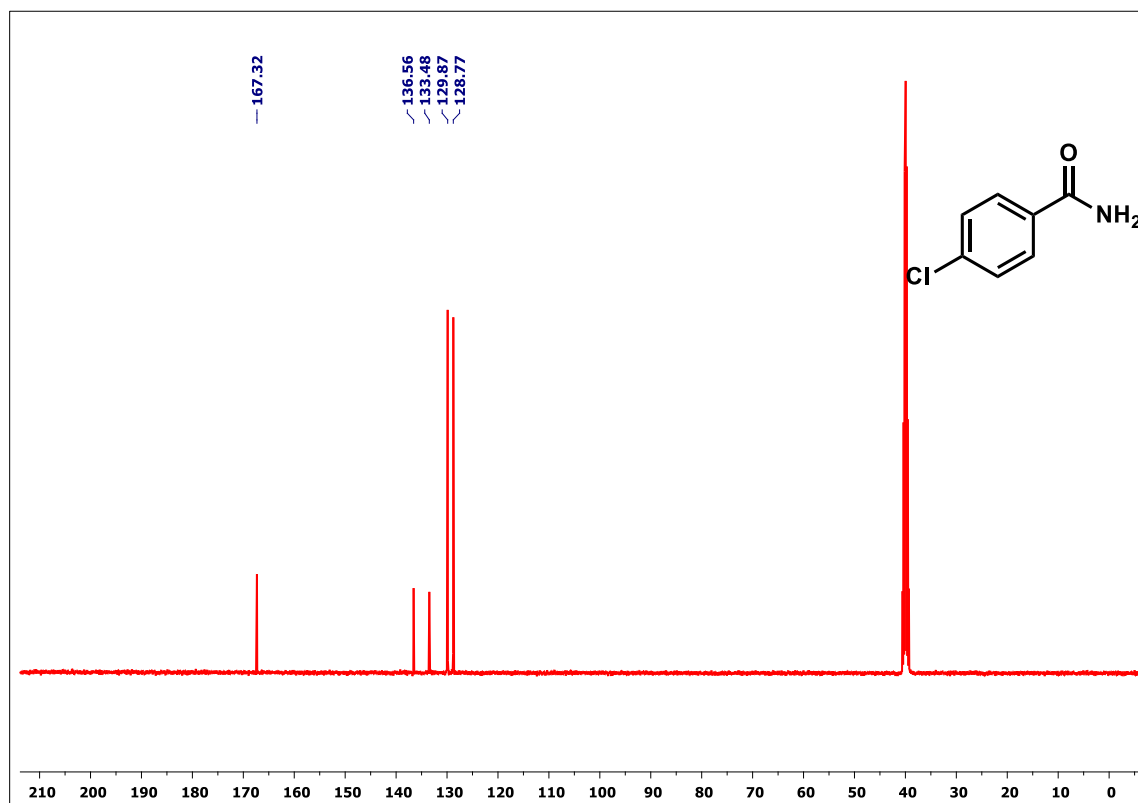

**Figure S13:** 100 MHz  $^{13}\text{C}$  NMR spectrum of 4-chloro benzamide in  $\text{DMSO-d}_6$

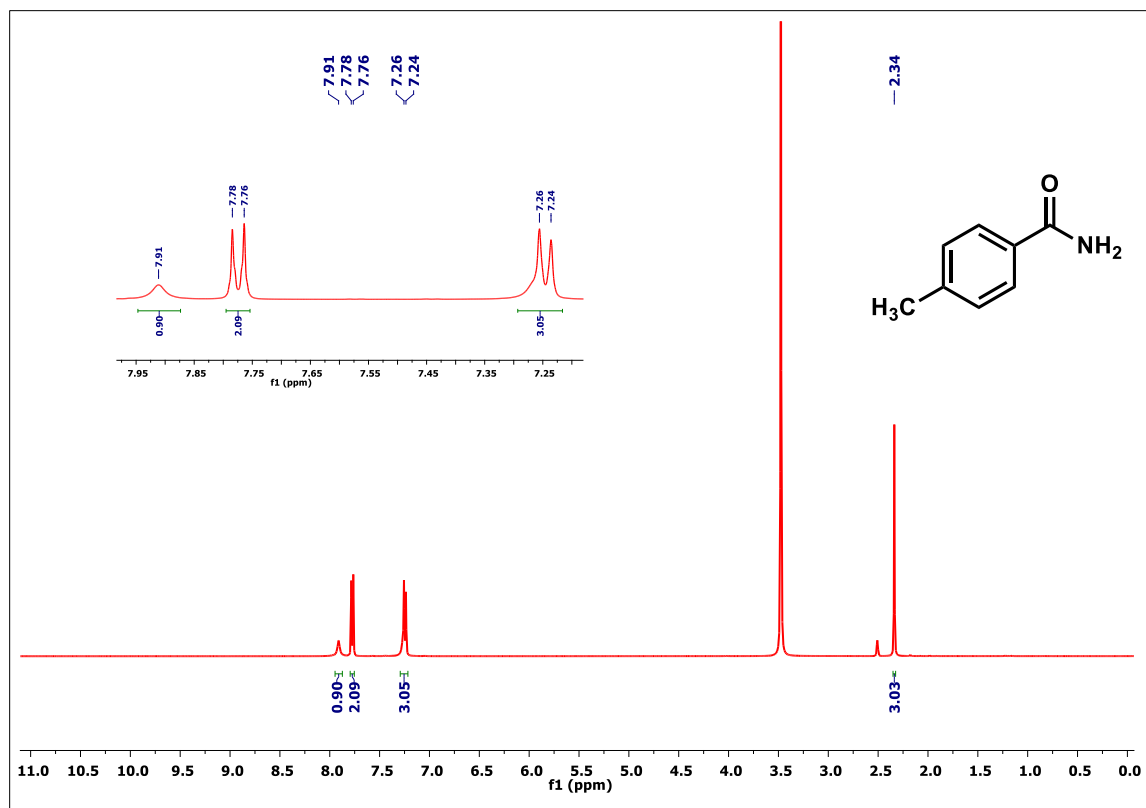

**Figure S14:** 400 MHz  $^1\text{H}$  NMR spectrum of 4-methyl benzamide in  $\text{DMSO-d}_6$

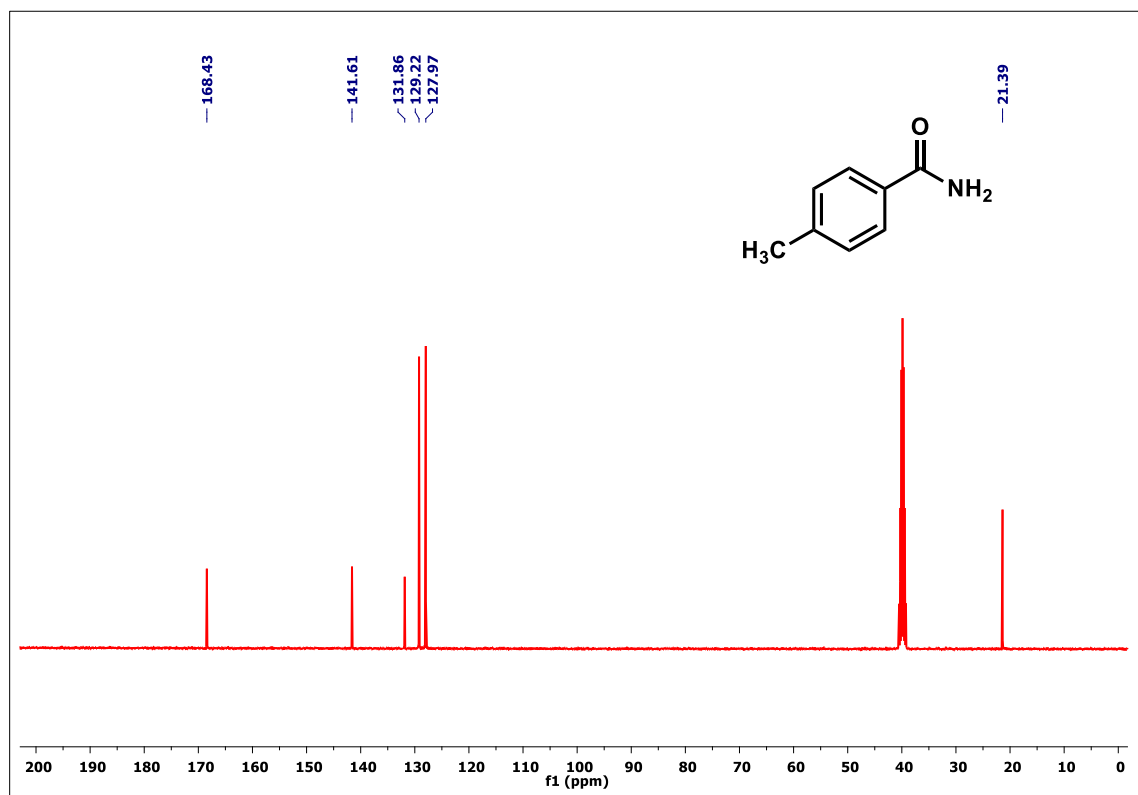

**Figure S15:** 100 MHz  $^{13}\text{C}$  NMR spectrum of 4-methyl benzamide in  $\text{DMSO-d}_6$

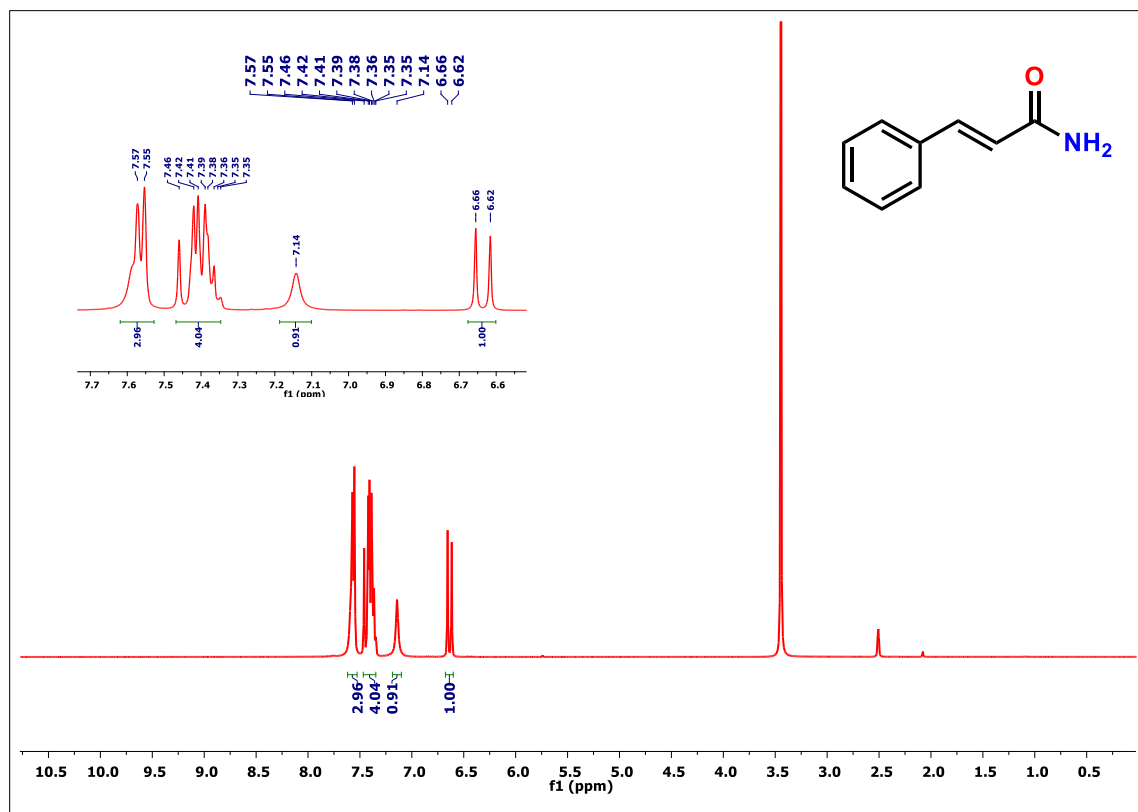

**Figure S16:** 400 MHz  $^1\text{H}$  NMR spectrum of cinnamamide in  $\text{DMSO-d}_6$

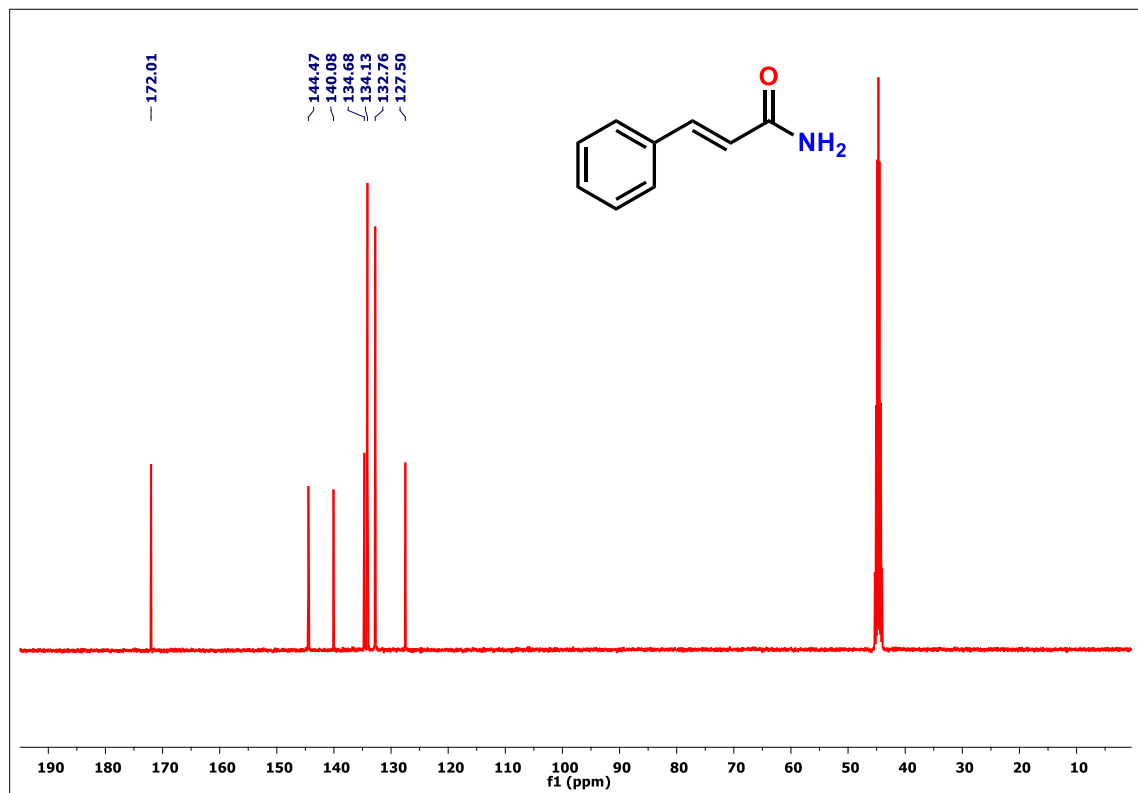

**Figure S17:** 100 MHz  $^{13}\text{C}$  NMR spectrum of cinnamamide in  $\text{DMSO-d}_6$

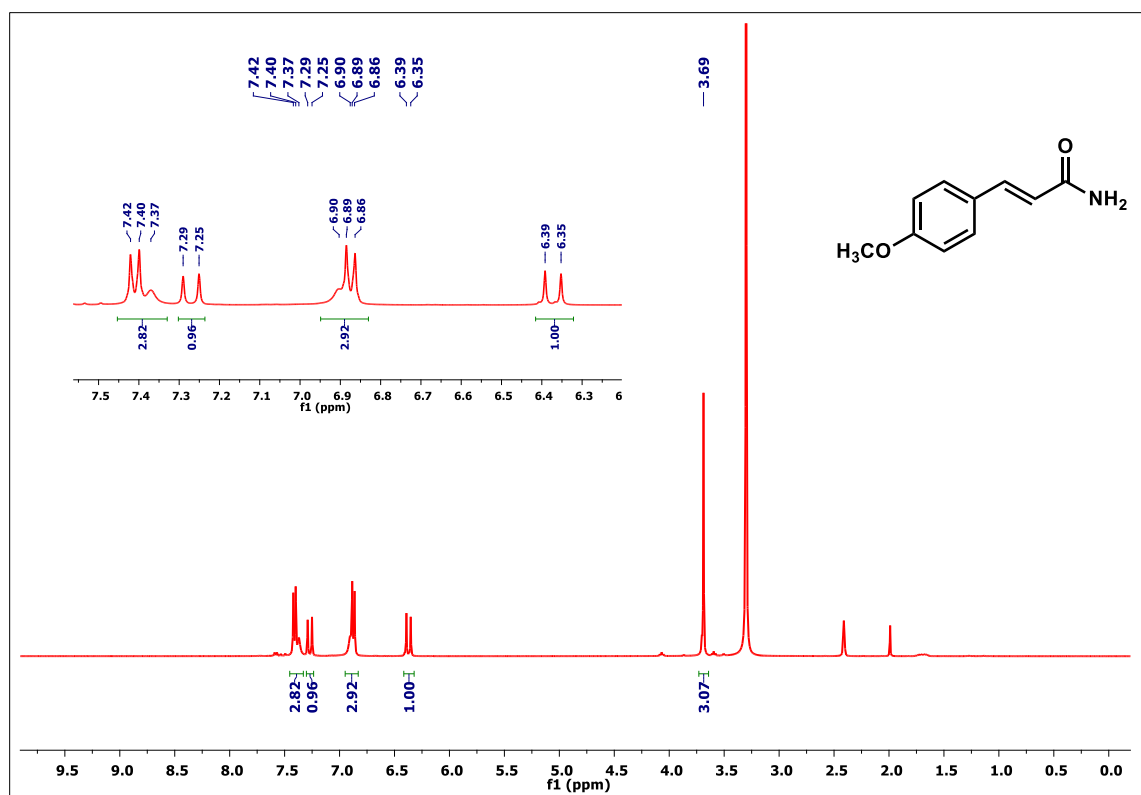

**Figure S18:** 400 MHz  $^1\text{H}$  NMR spectrum of 4-methoxy cinnamamide in  $\text{DMSO-d}_6$

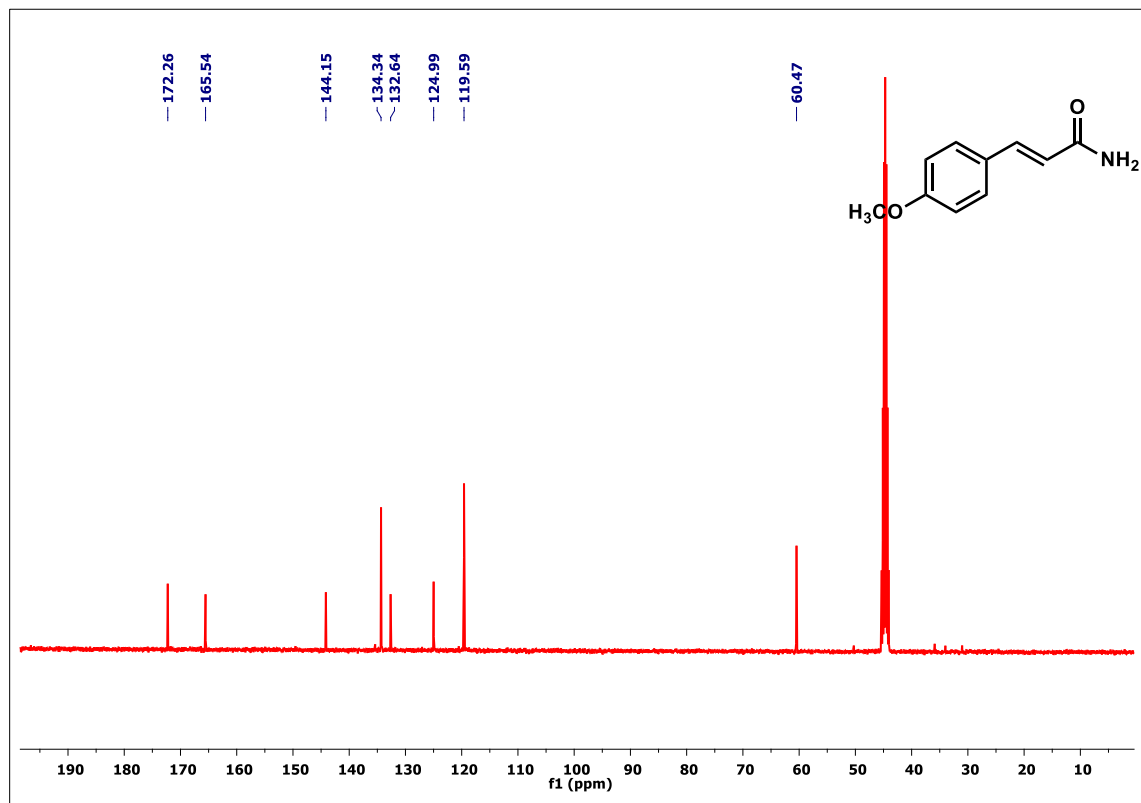

**Figure S19:** 100 MHz  $^{13}\text{C}$  NMR spectrum of 4-methoxy cinnamamide in  $\text{DMSO-d}_6$



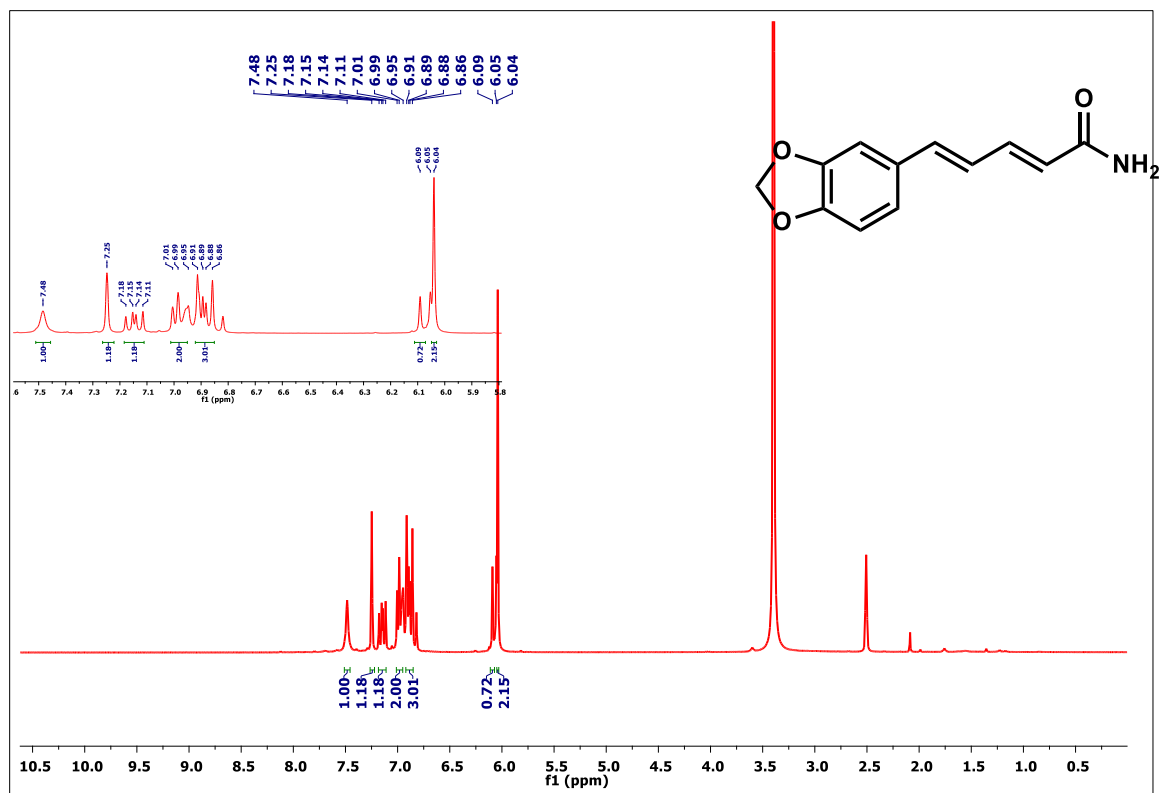

Figure S20: 400 MHz  $^1\text{H}$  NMR spectrum of pipericamide in  $\text{DMSO-d}_6$

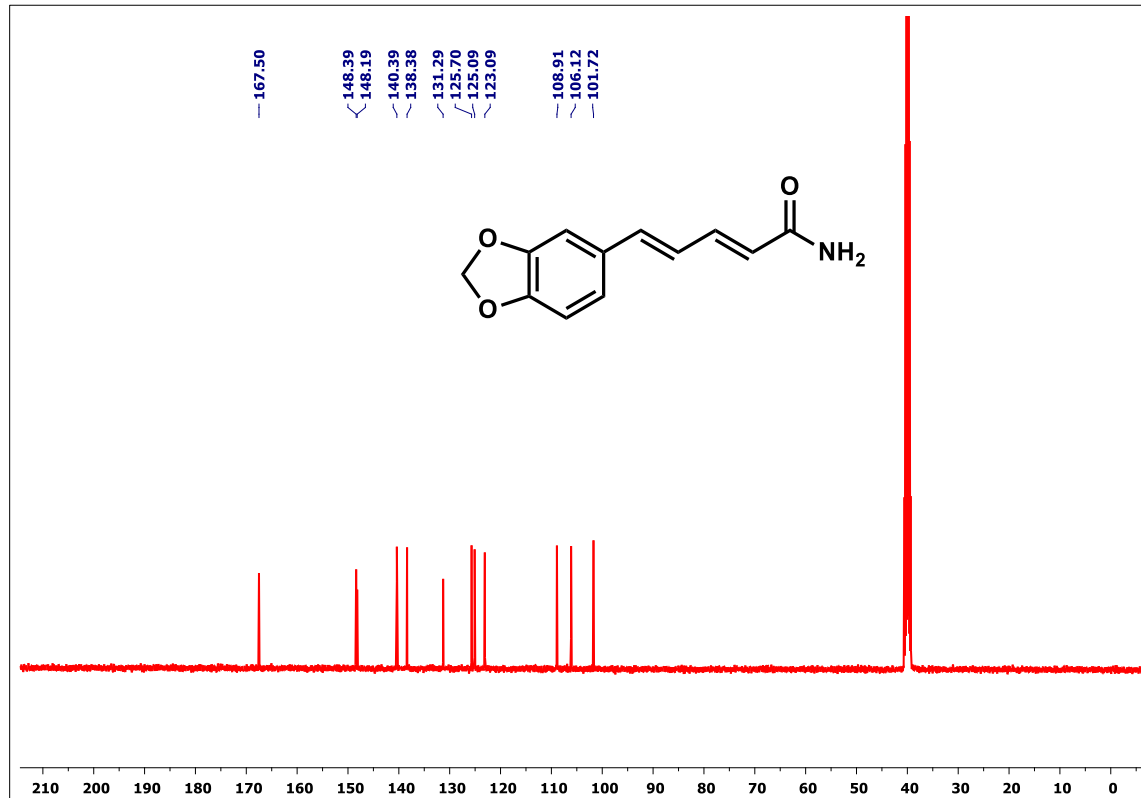

Figure S21: 100 MHz  $^{13}\text{C}$  NMR spectrum of pipericamide in  $\text{DMSO-d}_6$

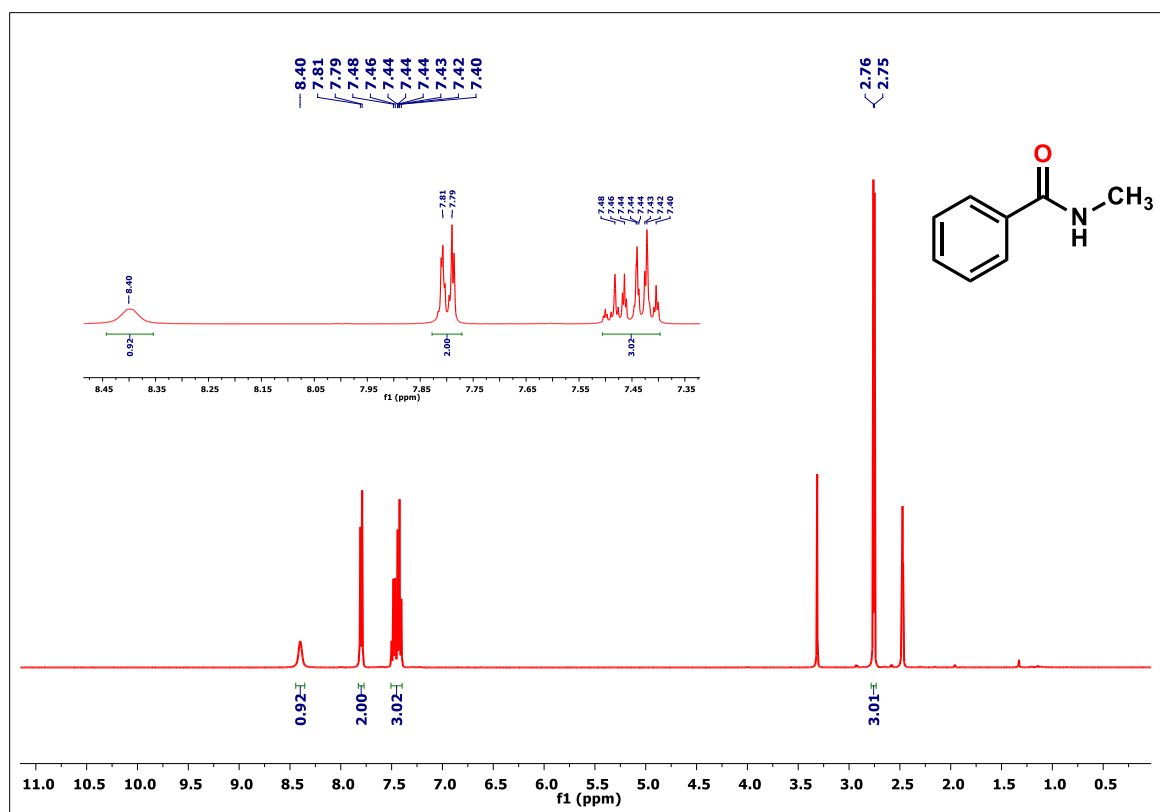

**Figure S22:** 400 MHz  $^1\text{H}$  NMR spectrum of *N*-methyl benzamide in  $\text{DMSO-d}_6$

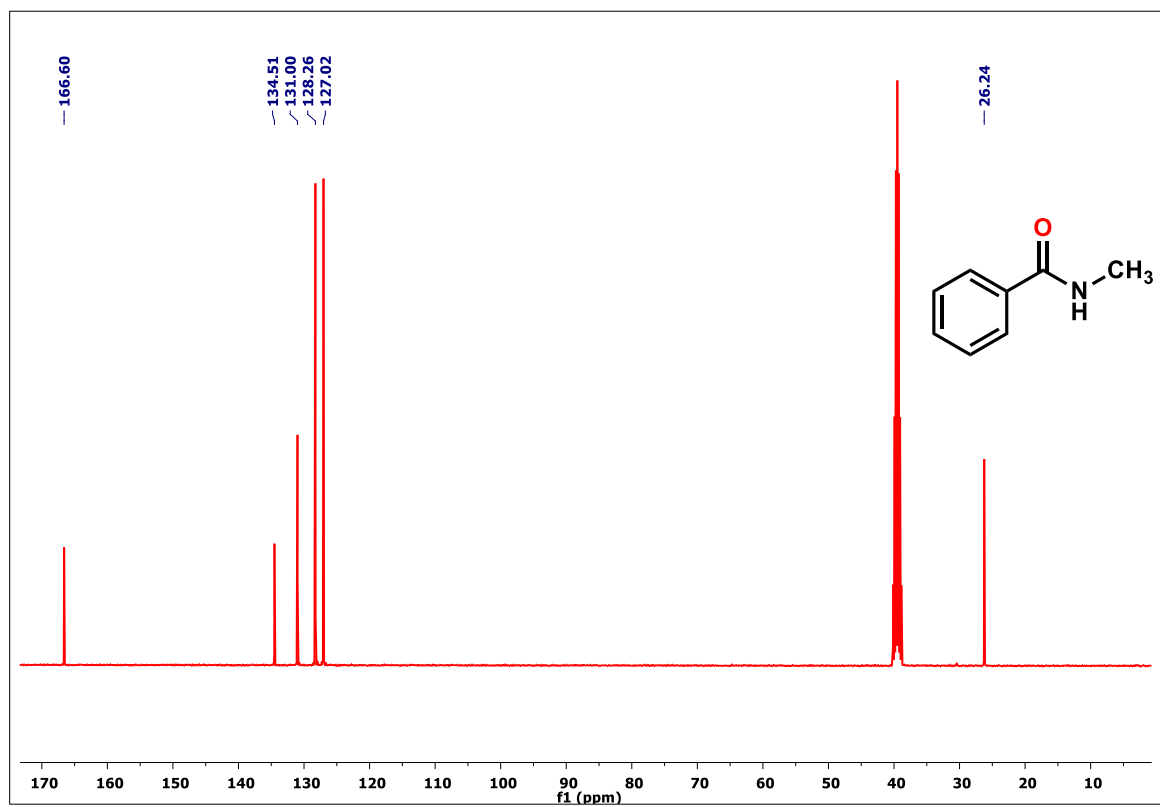

**Figure S23:** 100 MHz  $^{13}\text{C}$  NMR spectrum of *N*-methyl benzamide in  $\text{DMSO-d}_6$

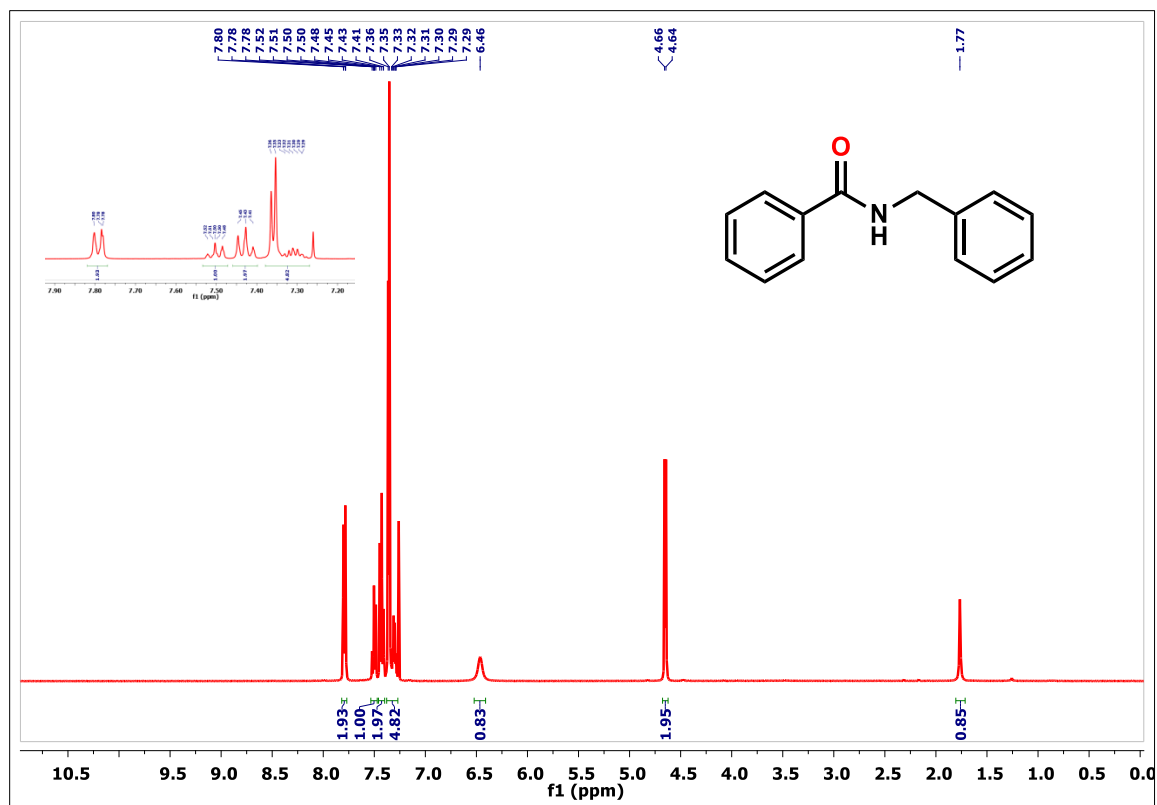

Figure S24: 400 MHz <sup>1</sup>H NMR spectrum of **4** in CDCl<sub>3</sub>

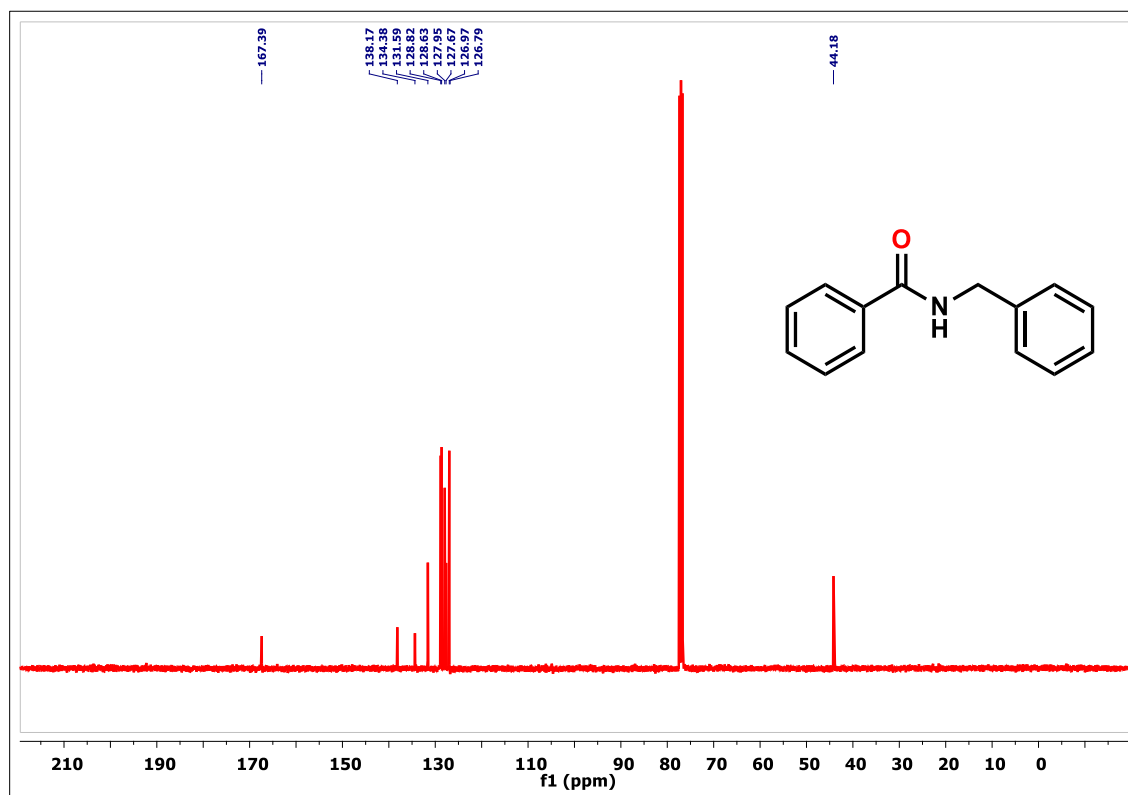

Figure S25: 100 MHz <sup>13</sup>C NMR spectrum of **4** in CDCl<sub>3</sub>

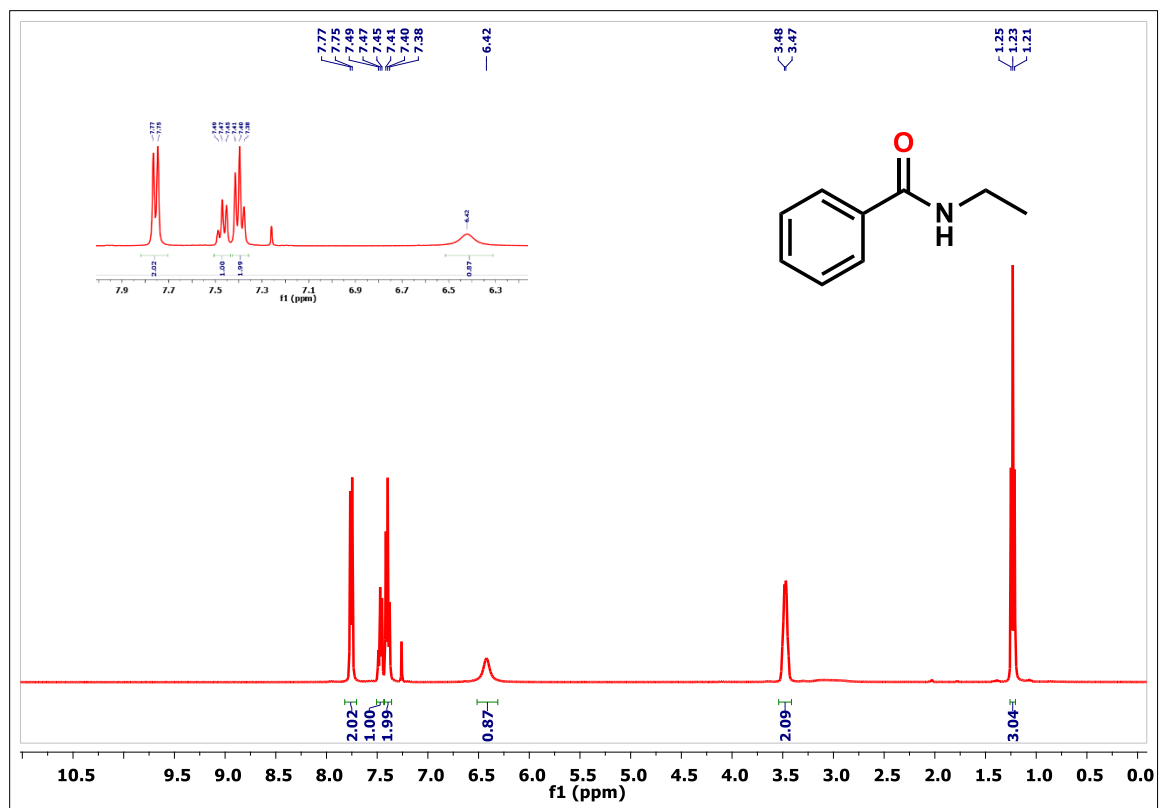

Figure S26: 400 MHz  $^1\text{H}$  NMR spectrum of **5** in  $\text{CDCl}_3$

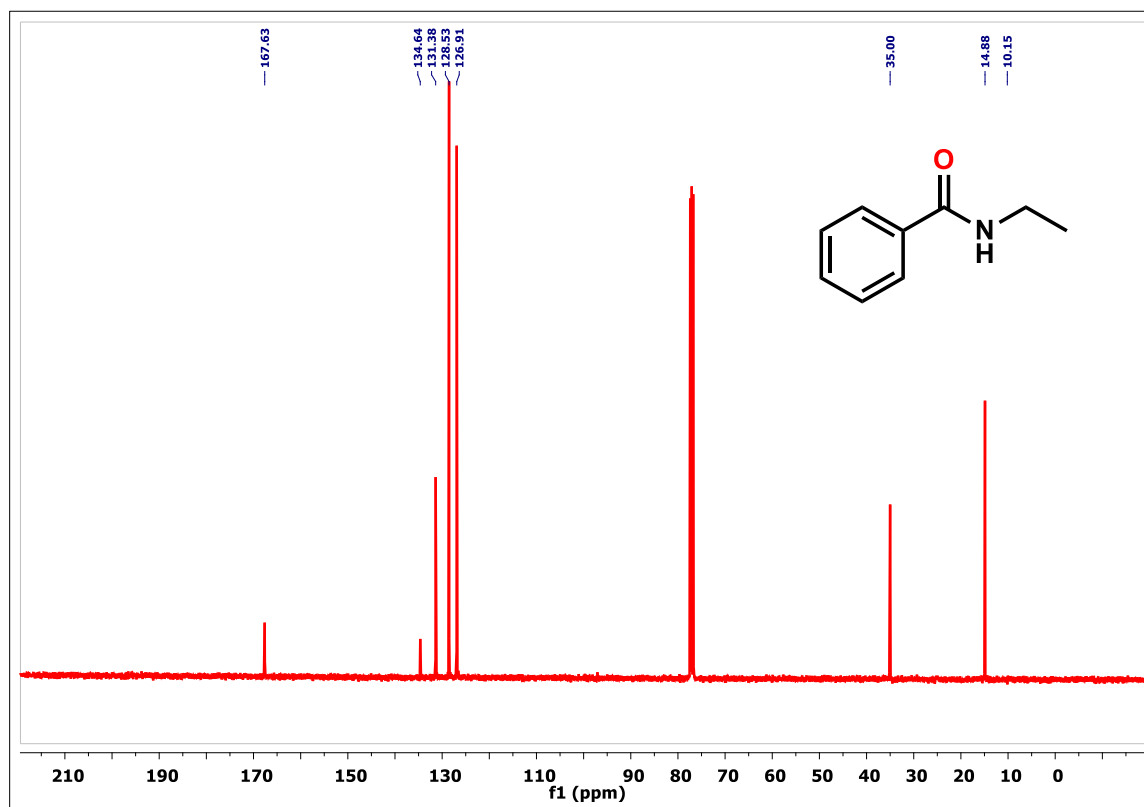

Figure S27: 100 MHz  $^{13}\text{C}$  NMR spectrum of **5** in  $\text{CDCl}_3$

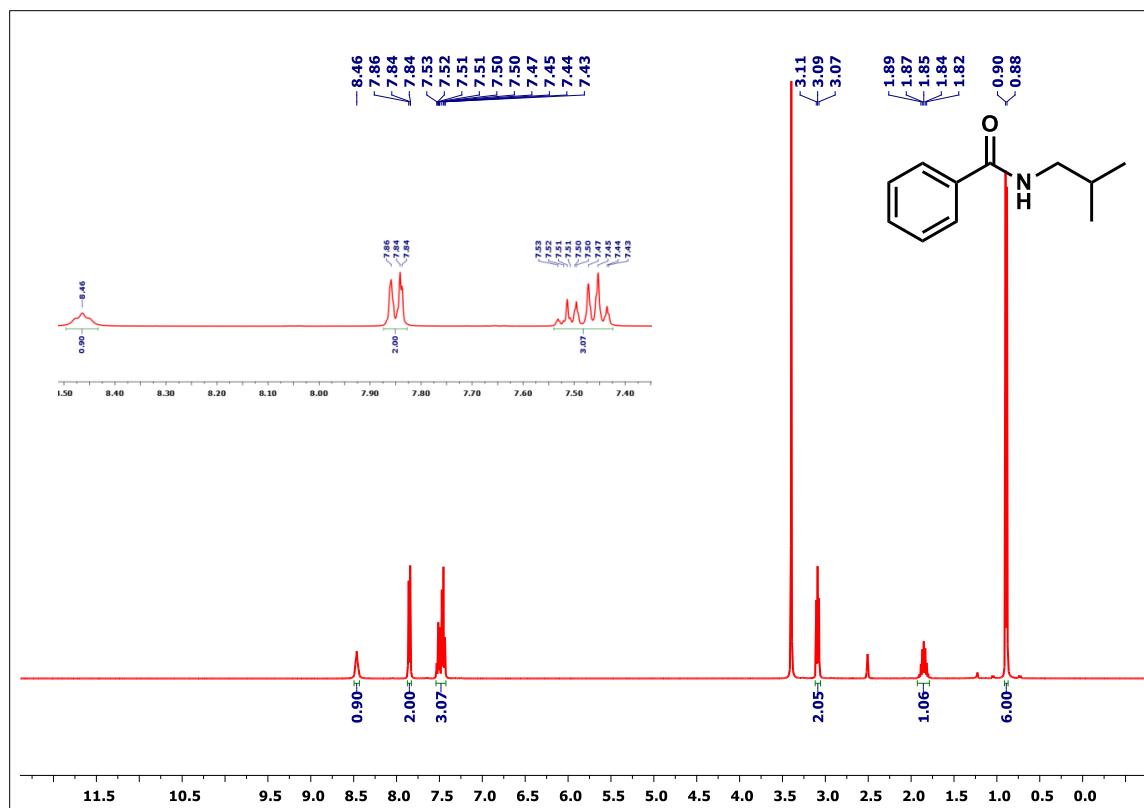

Figure S28: 400 MHz  $^1\text{H}$  NMR spectrum of **6** in  $\text{DMSO-d}_6$

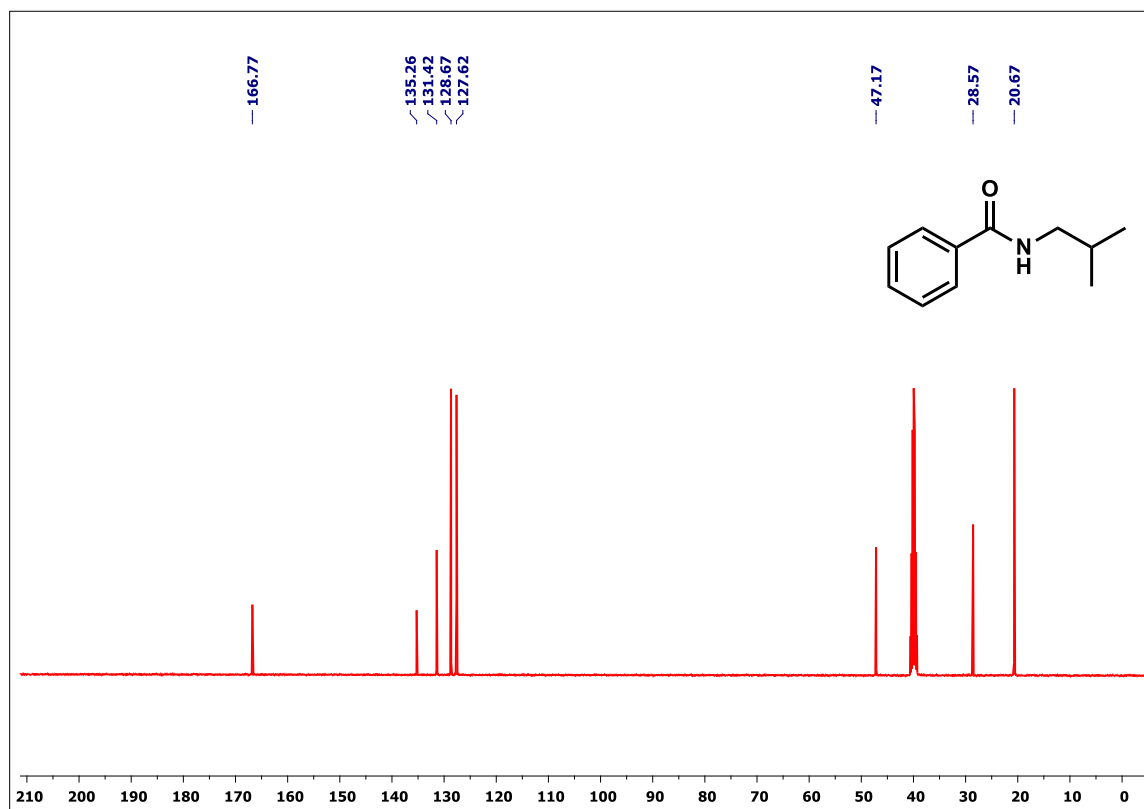

Figure S29: 100 MHz  $^{13}\text{C}$  NMR spectrum of **6** in  $\text{DMSO-d}_6$

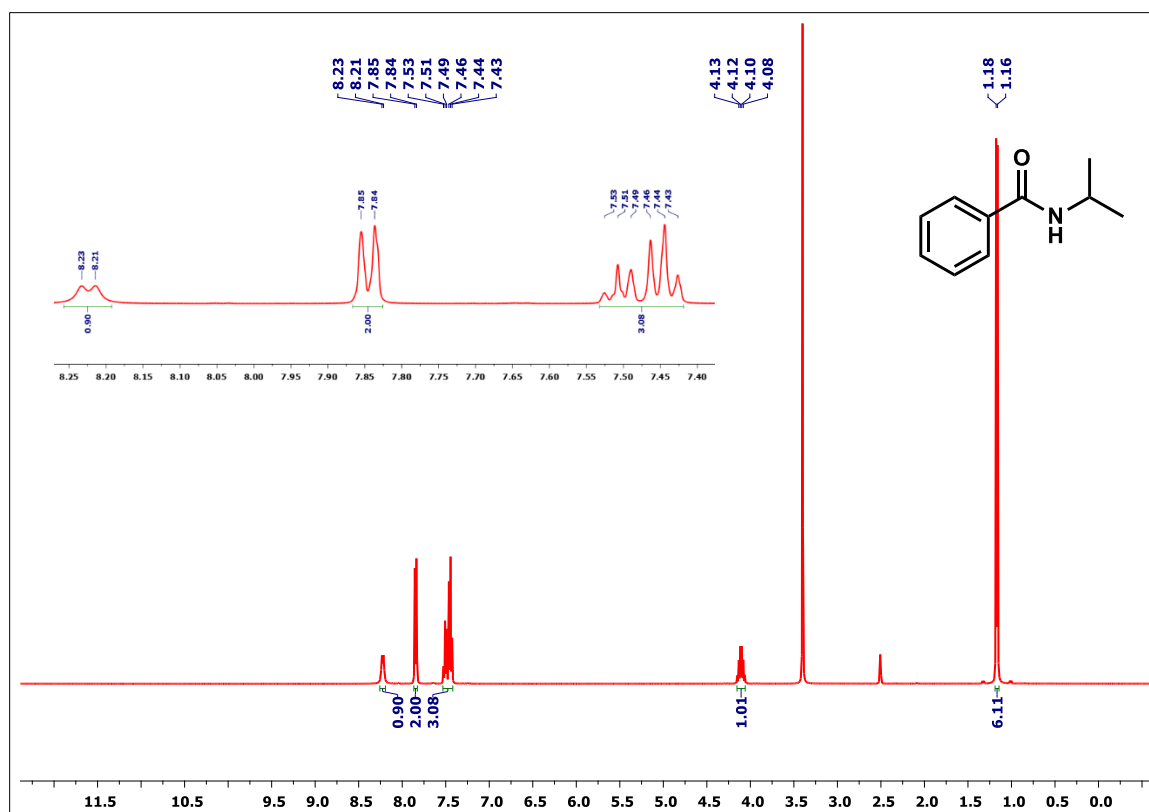

Figure S30: 400 MHz  $^1\text{H}$  NMR spectrum of **7** in  $\text{DMSO-d}_6$

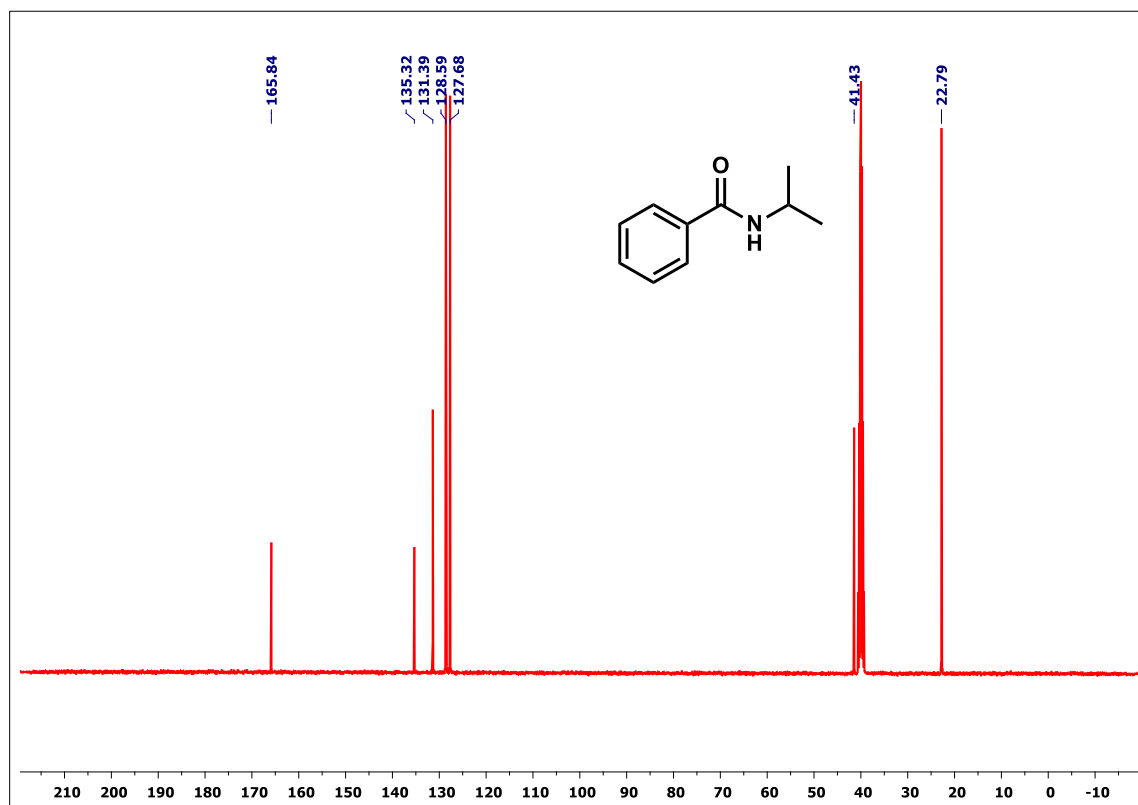

Figure S31: 100 MHz  $^{13}\text{C}$  NMR spectrum of **7** in  $\text{DMSO-d}_6$

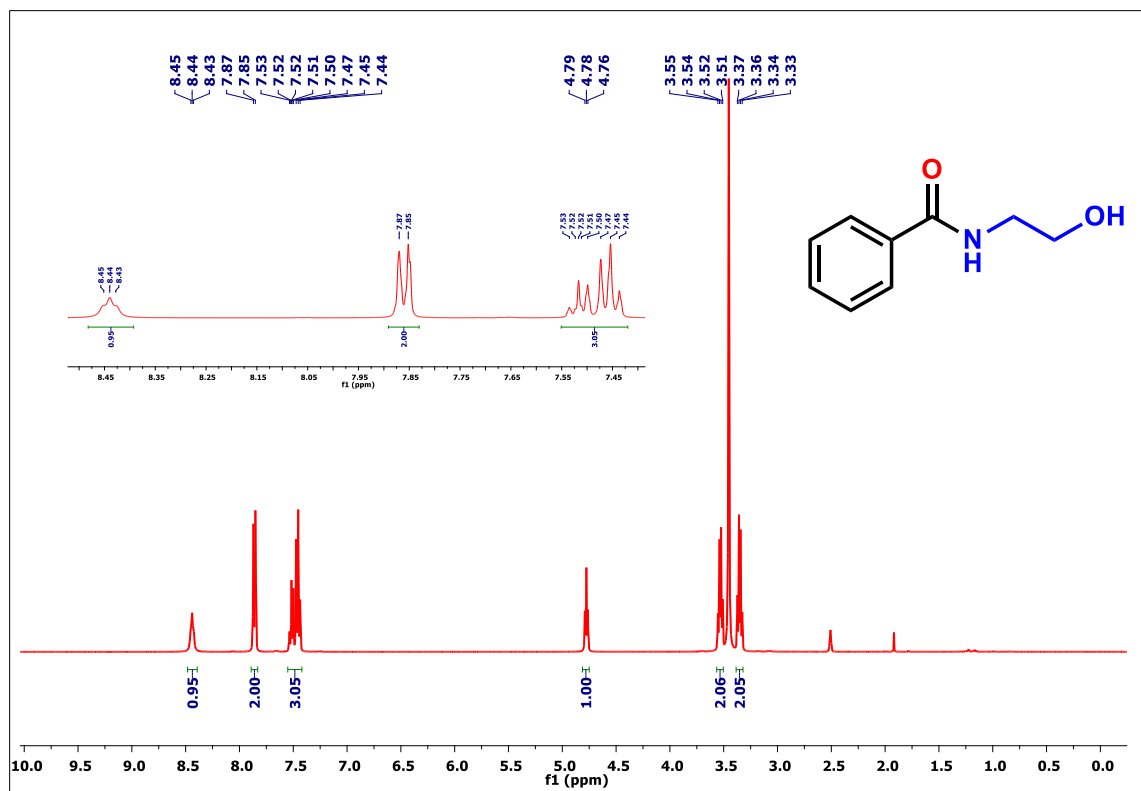

**Figure S32:** 400 MHz  $^1\text{H}$  NMR spectrum of **8** in  $\text{DMSO-d}_6$

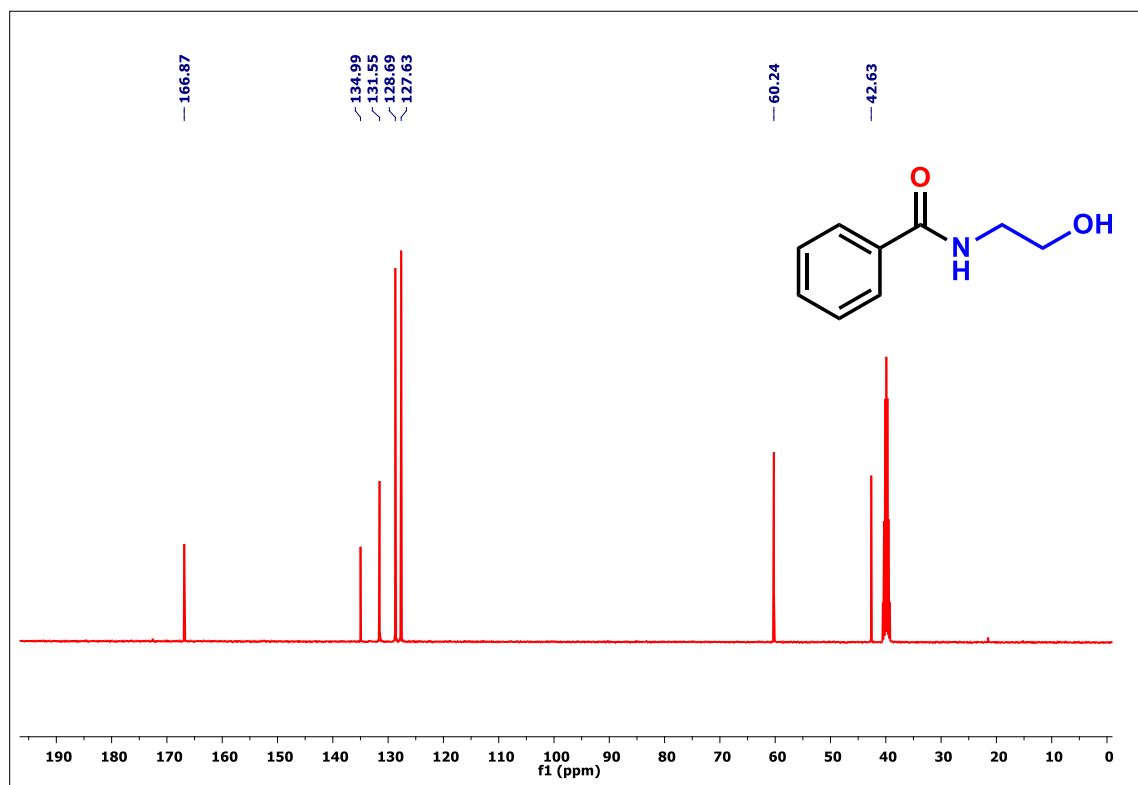

**Figure S33:** 100 MHz  $^{13}\text{C}$  NMR spectrum of **8** in  $\text{DMSO-d}_6$

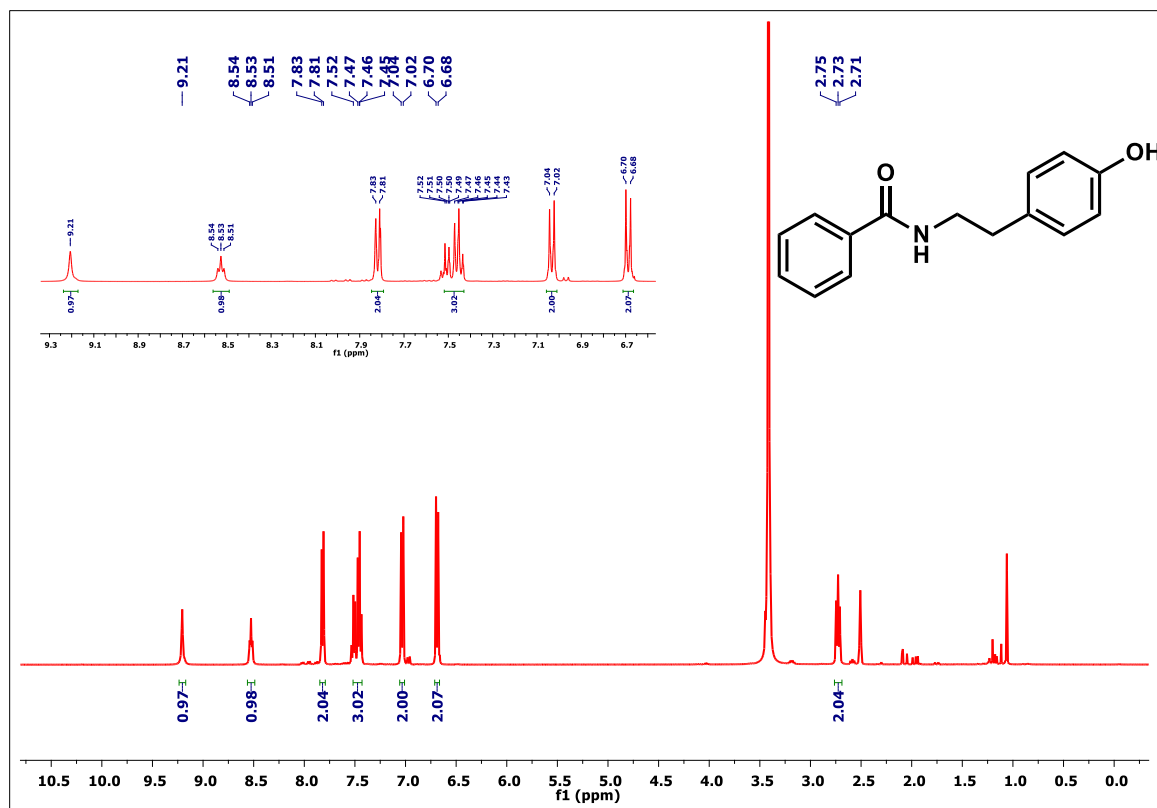

Figure S34: 400 MHz <sup>1</sup>H NMR spectrum of **9** in DMSO-d<sub>6</sub>

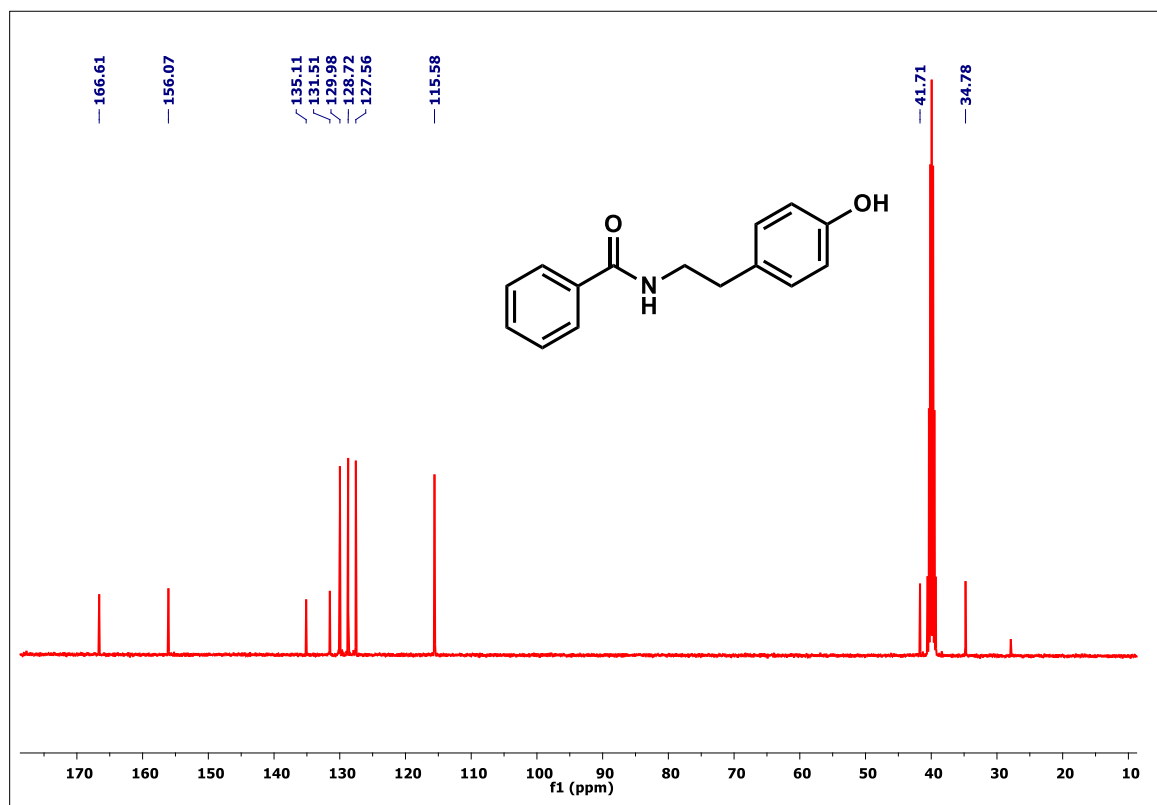

Figure S35: 100 MHz <sup>13</sup>C NMR spectrum of **9** in DMSO-d<sub>6</sub>



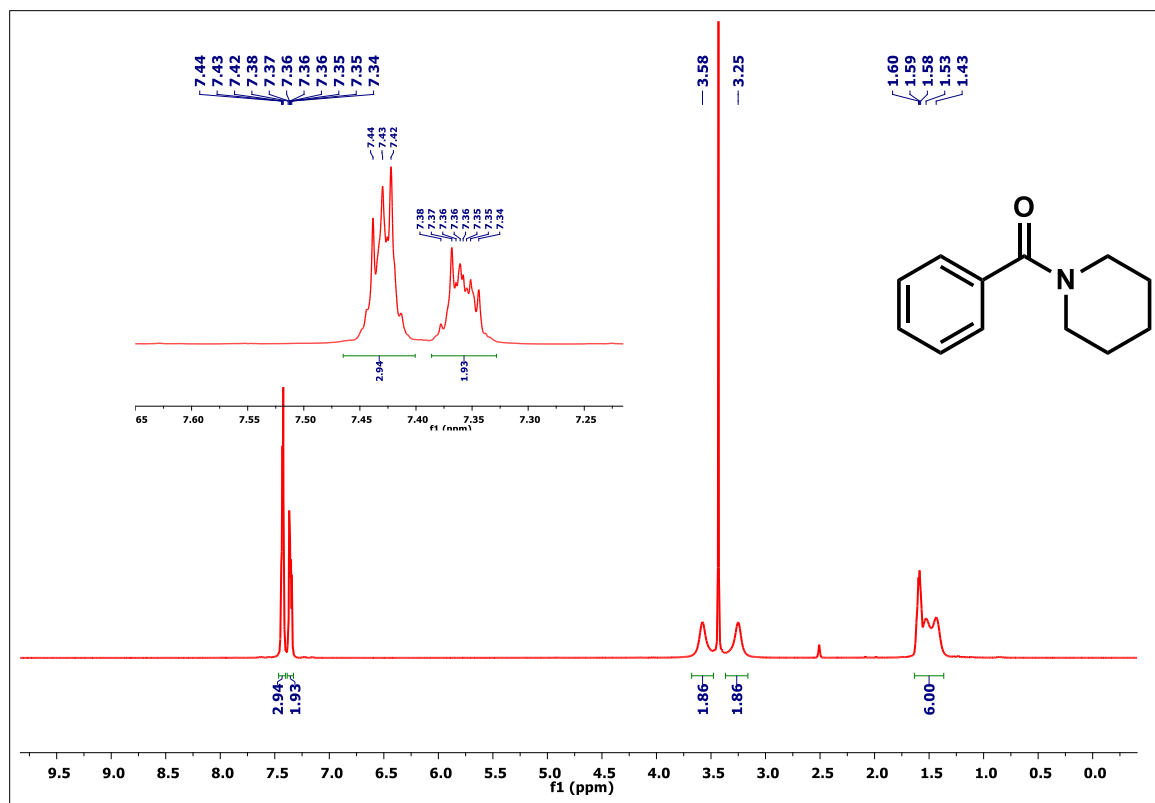

Figure S36: 400 MHz <sup>1</sup>H NMR spectrum of **10** in DMSO-d<sub>6</sub>

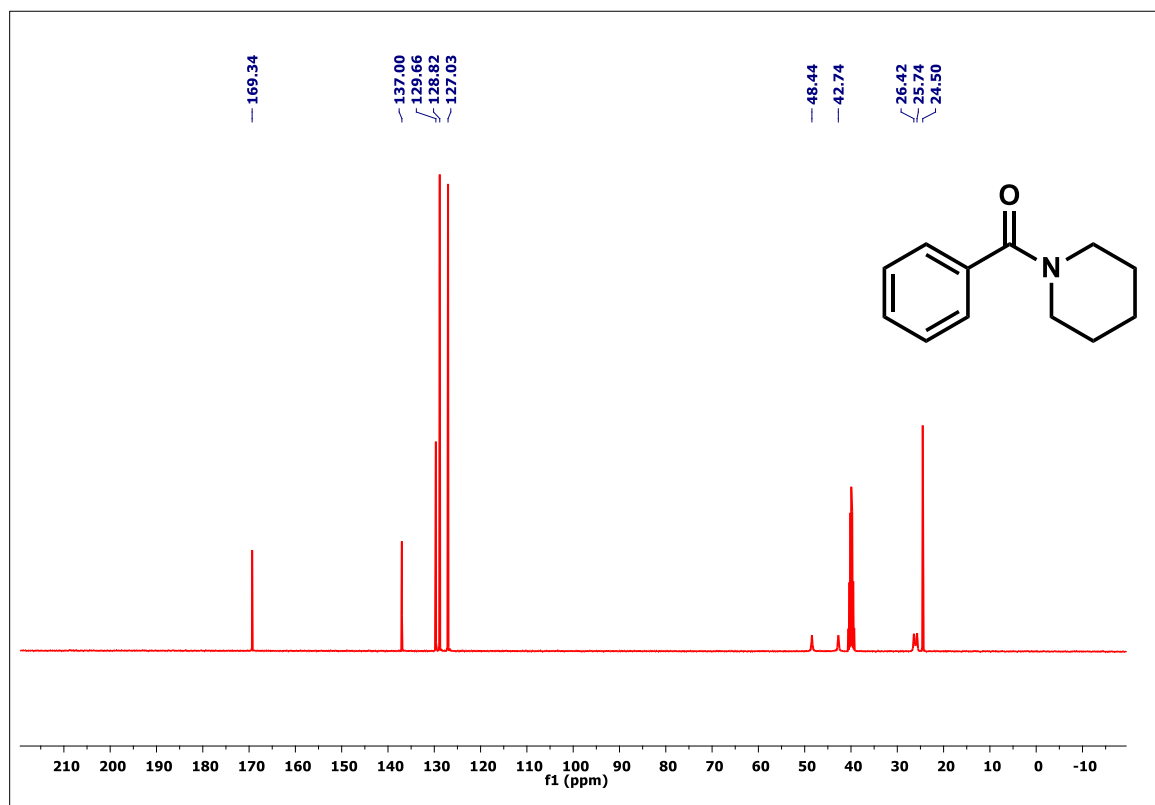

Figure S37: 100 MHz <sup>13</sup>C NMR spectrum of **10** in DMSO-d<sub>6</sub>

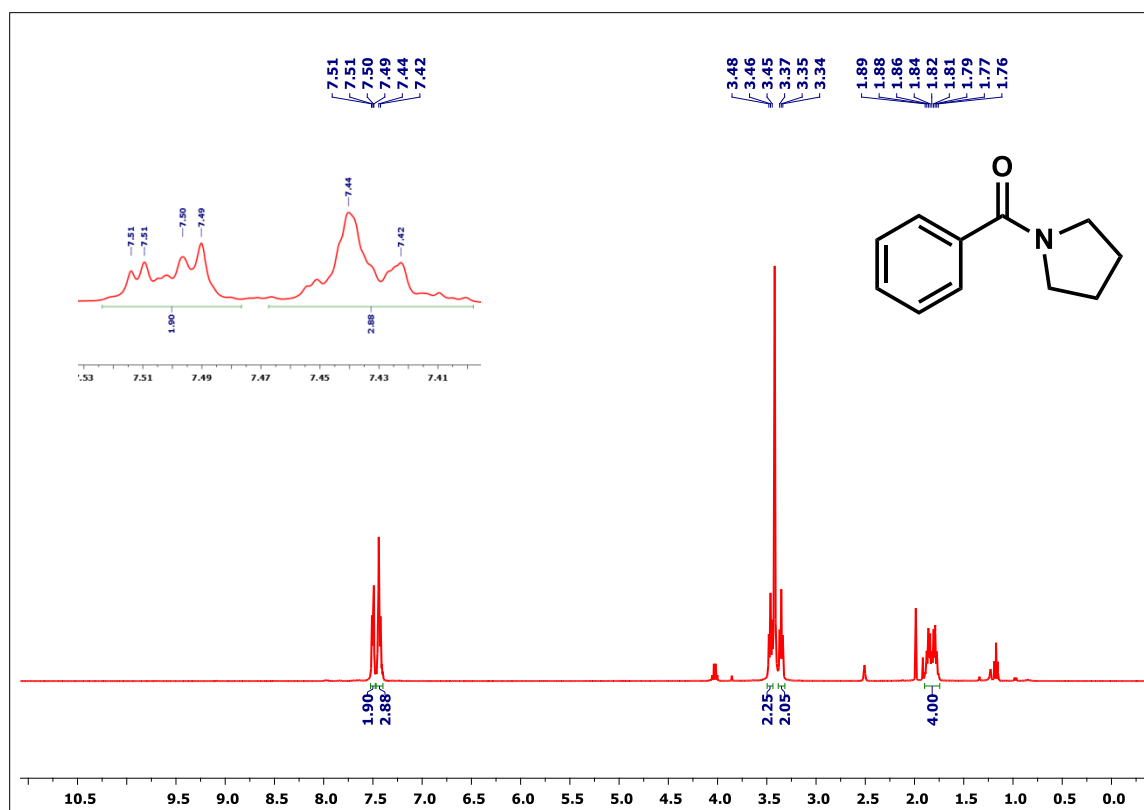

**Figure S38:** 400 MHz <sup>1</sup>H NMR spectrum of **11** in DMSO-d<sub>6</sub>

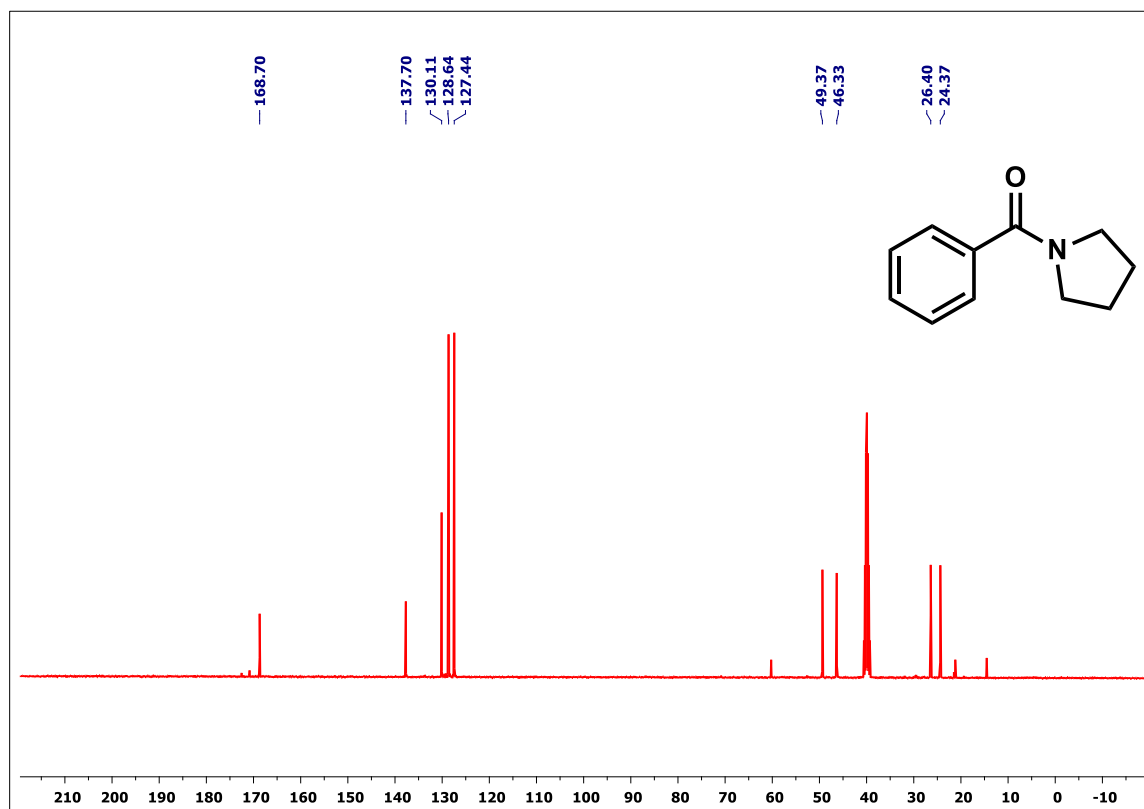

**Figure S40:** 100 MHz <sup>13</sup>C NMR spectrum of **11** in DMSO-d<sub>6</sub>

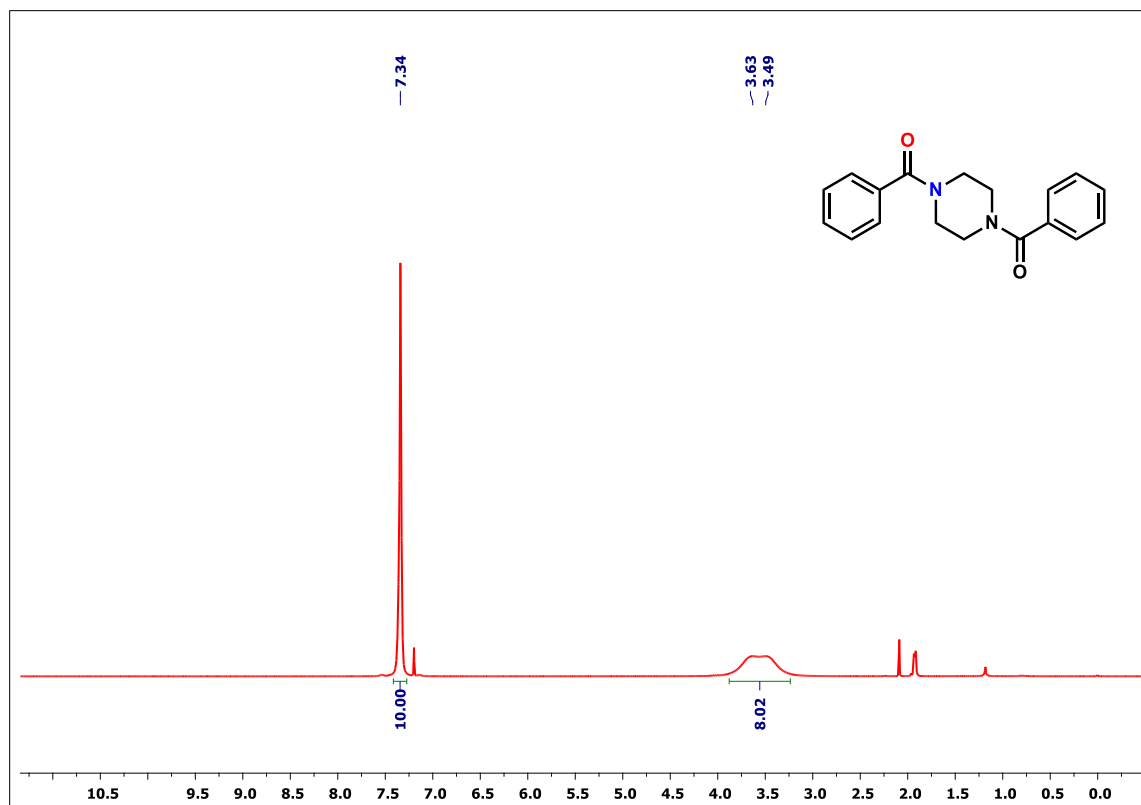

Figure S41: 400 MHz  $^1\text{H}$  NMR spectrum of **12** in  $\text{CDCl}_3$

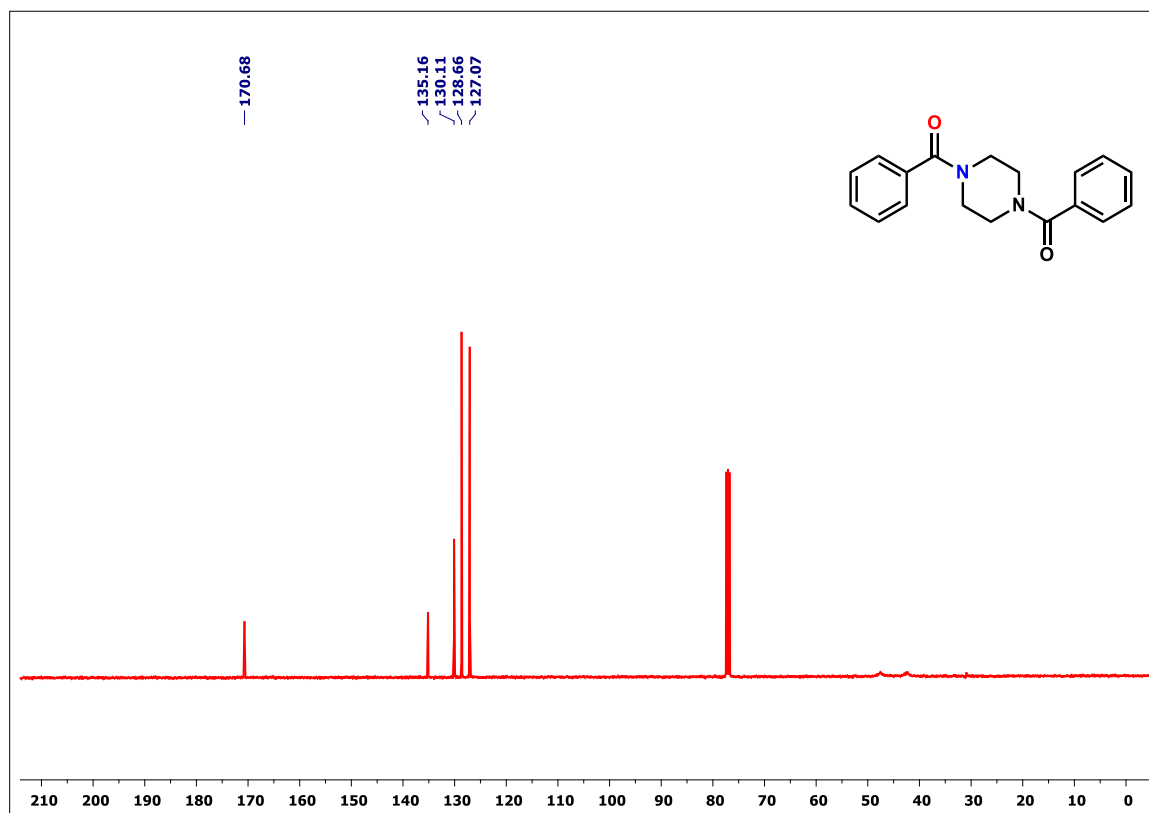

Figure S42: 100 MHz  $^{13}\text{C}$  NMR spectrum of **12** in  $\text{CDCl}_3$

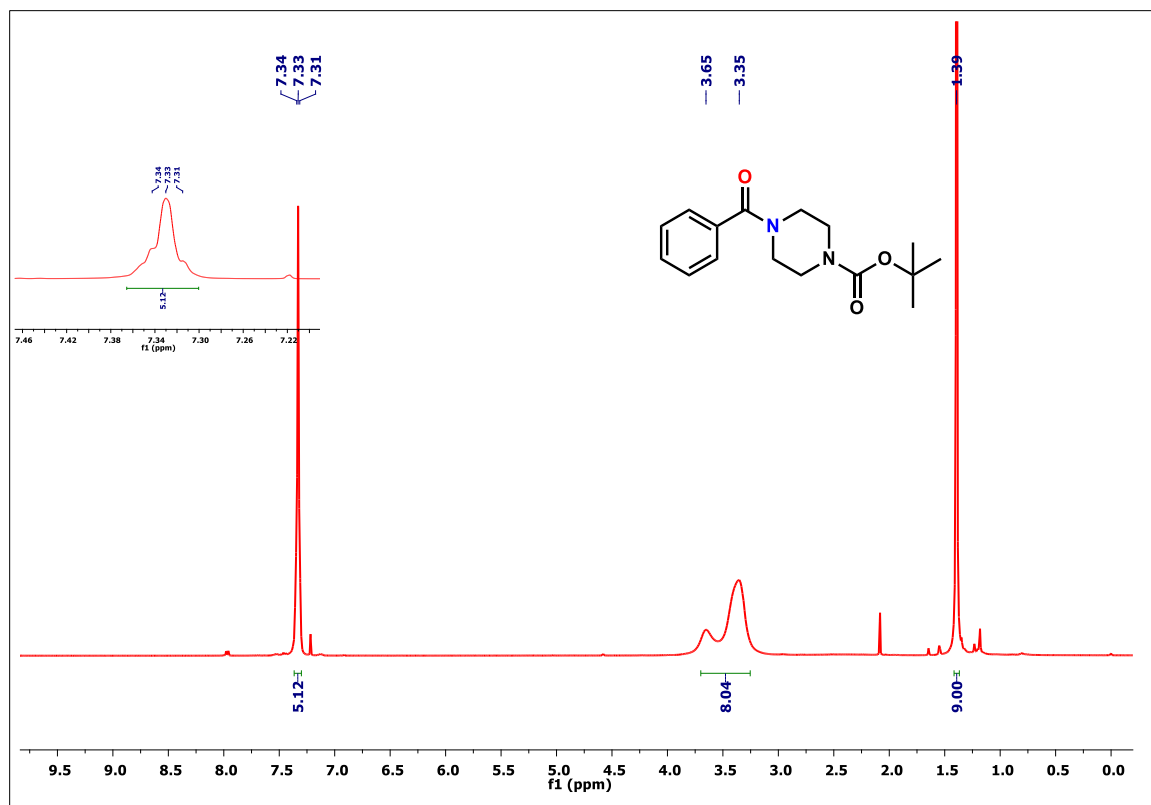

**Figure S43:** 400 MHz  $^1\text{H}$  NMR spectrum of **13** in  $\text{CDCl}_3$

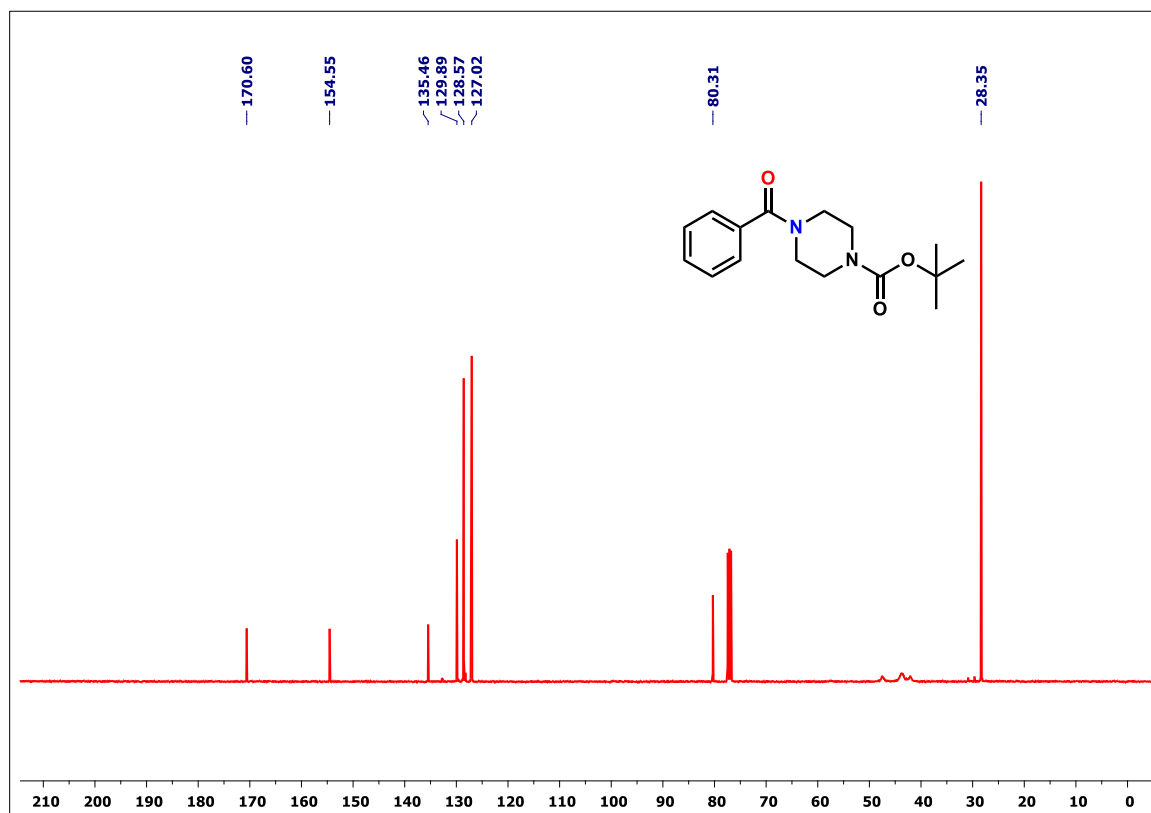

**Figure S44:** 100 MHz  $^{13}\text{C}$  NMR spectrum of **13** in  $\text{CDCl}_3$

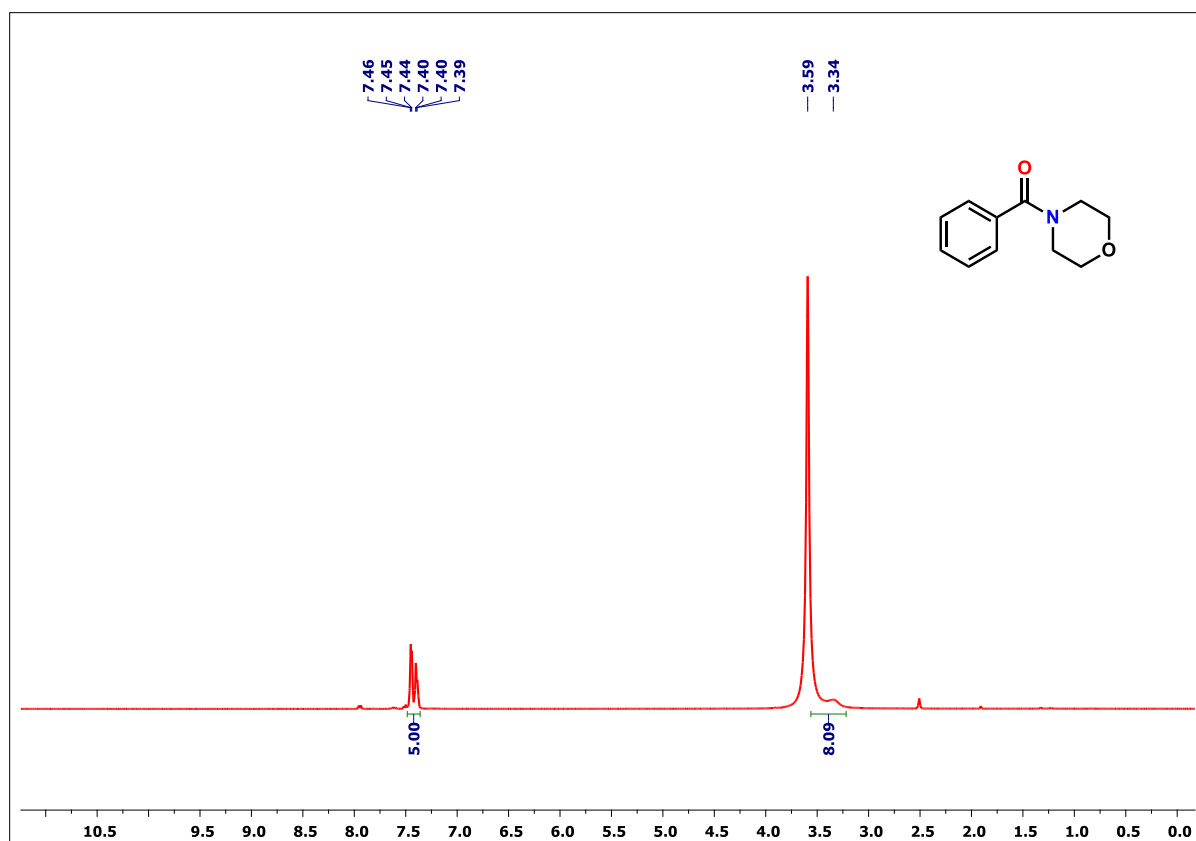

Figure S45: 400 MHz  $^1\text{H}$  NMR spectrum of **14** in  $\text{CDCl}_3$

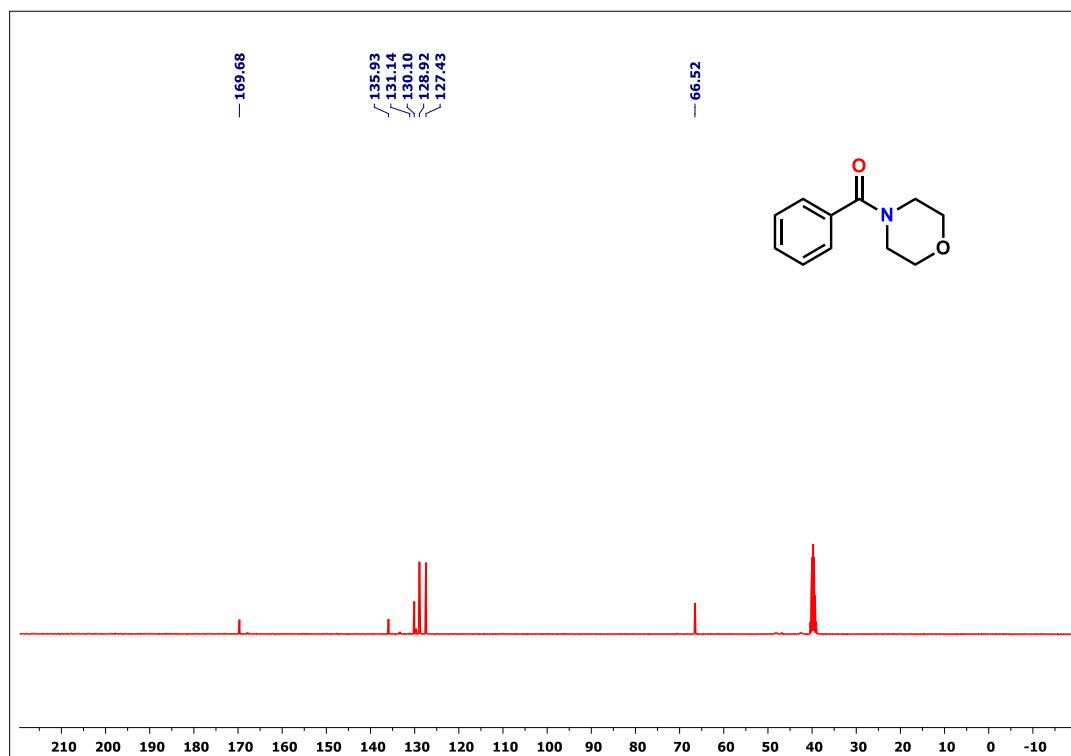

Figure S46: 100 MHz  $^{13}\text{C}$  NMR spectrum of **14** in  $\text{CDCl}_3$

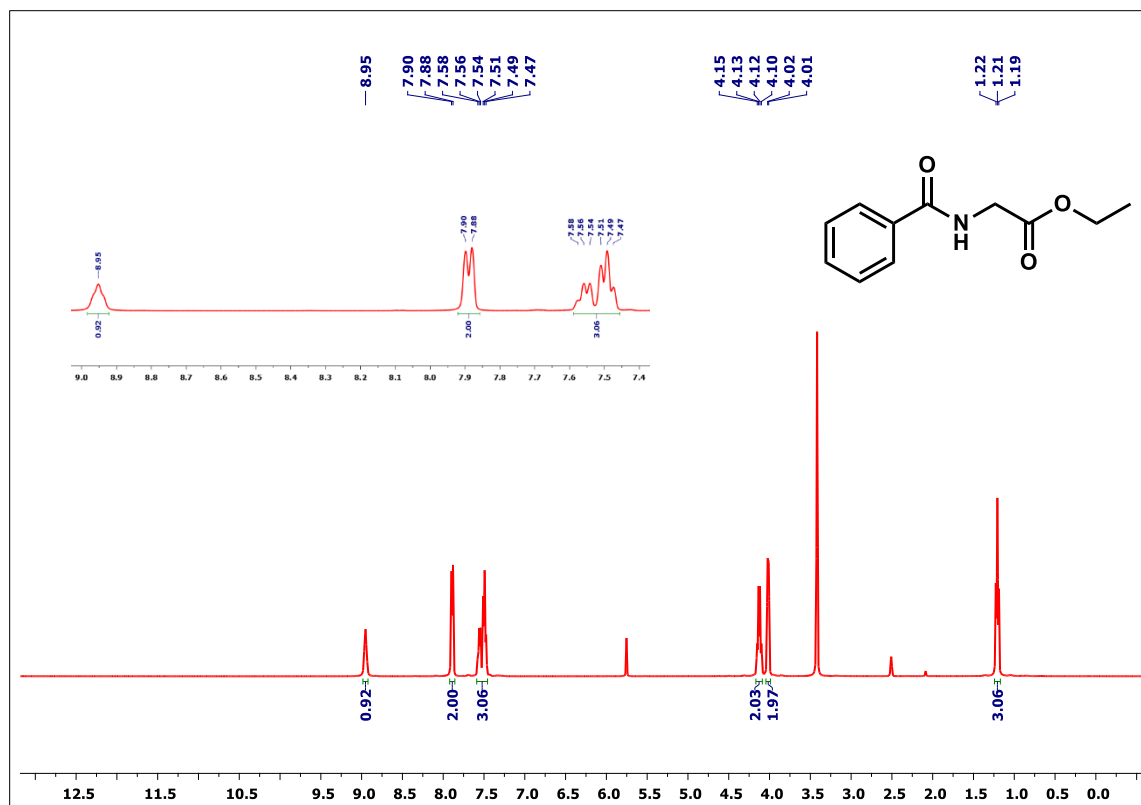

**Figure S47:** 400 MHz <sup>1</sup>H NMR spectrum of **15** in DMSO-d<sub>6</sub>

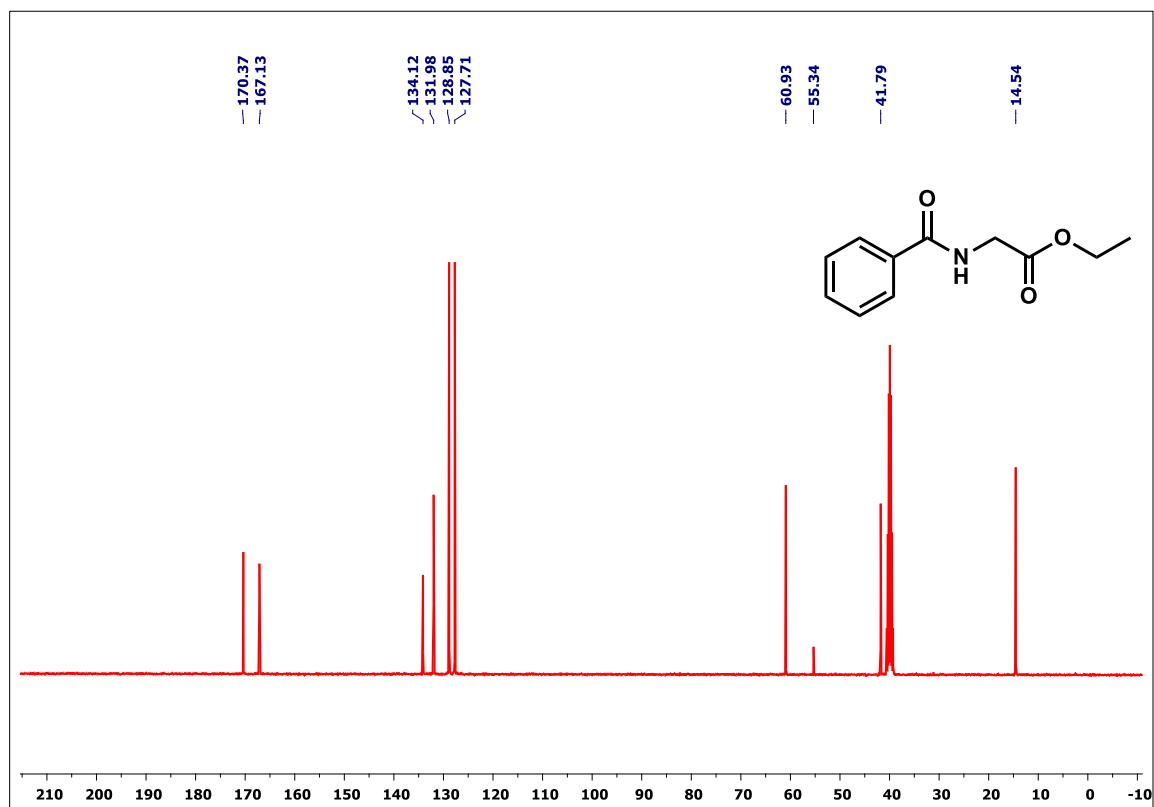

**Figure S48:** 100 MHz <sup>13</sup>C NMR spectrum of **15** in DMSO-d<sub>6</sub>

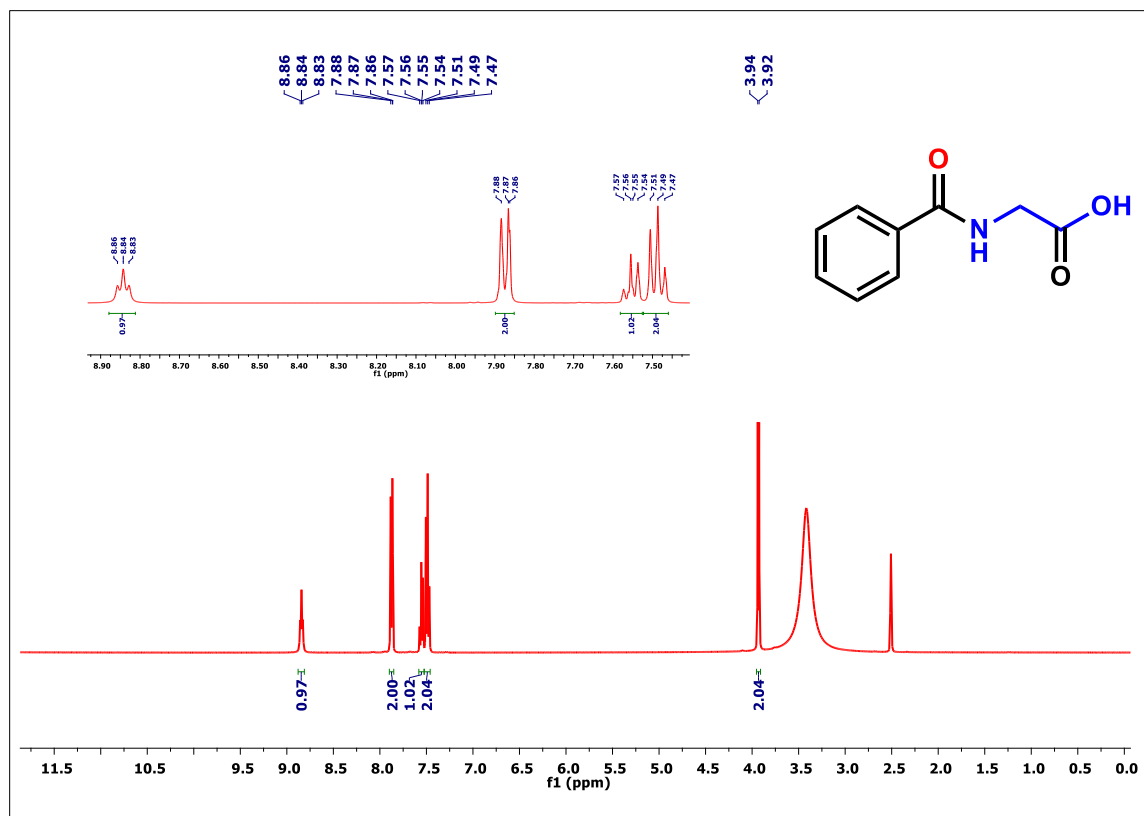

Figure S49: 400 MHz <sup>1</sup>H NMR spectrum of **16** in DMSO-d<sub>6</sub>

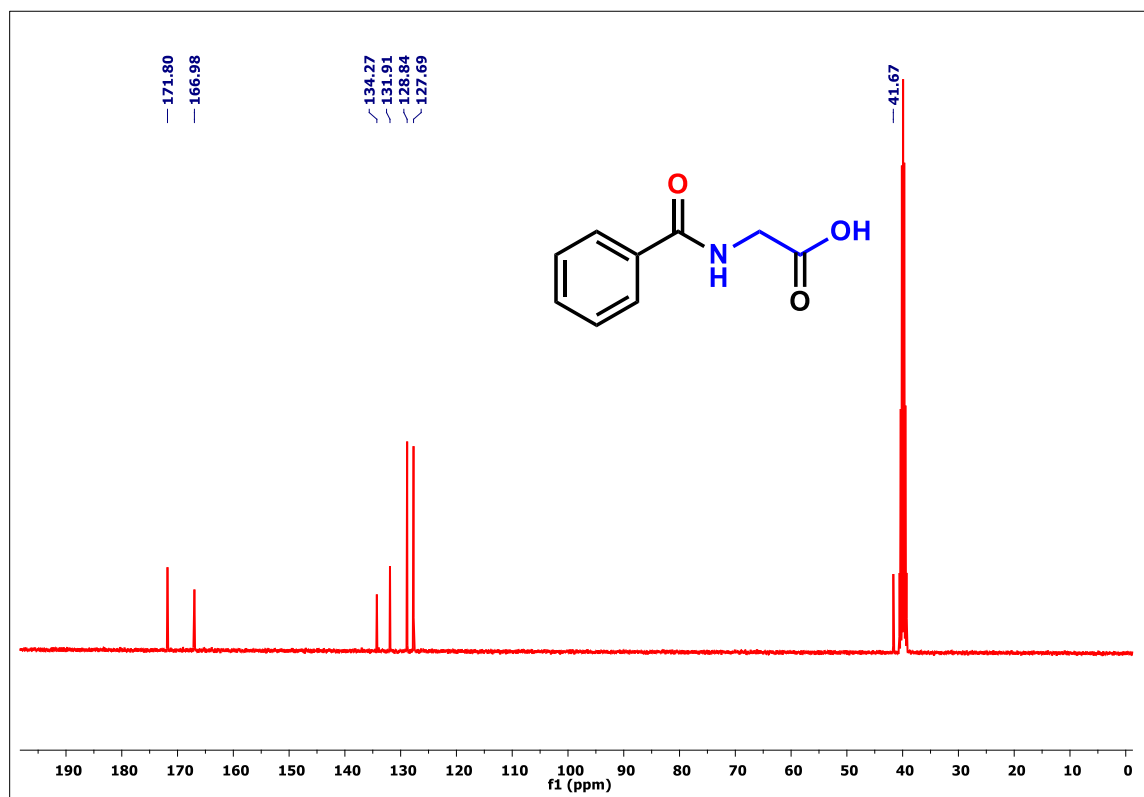

Figure S50: 100 MHz <sup>13</sup>C NMR spectrum of **16** in DMSO-d<sub>6</sub>

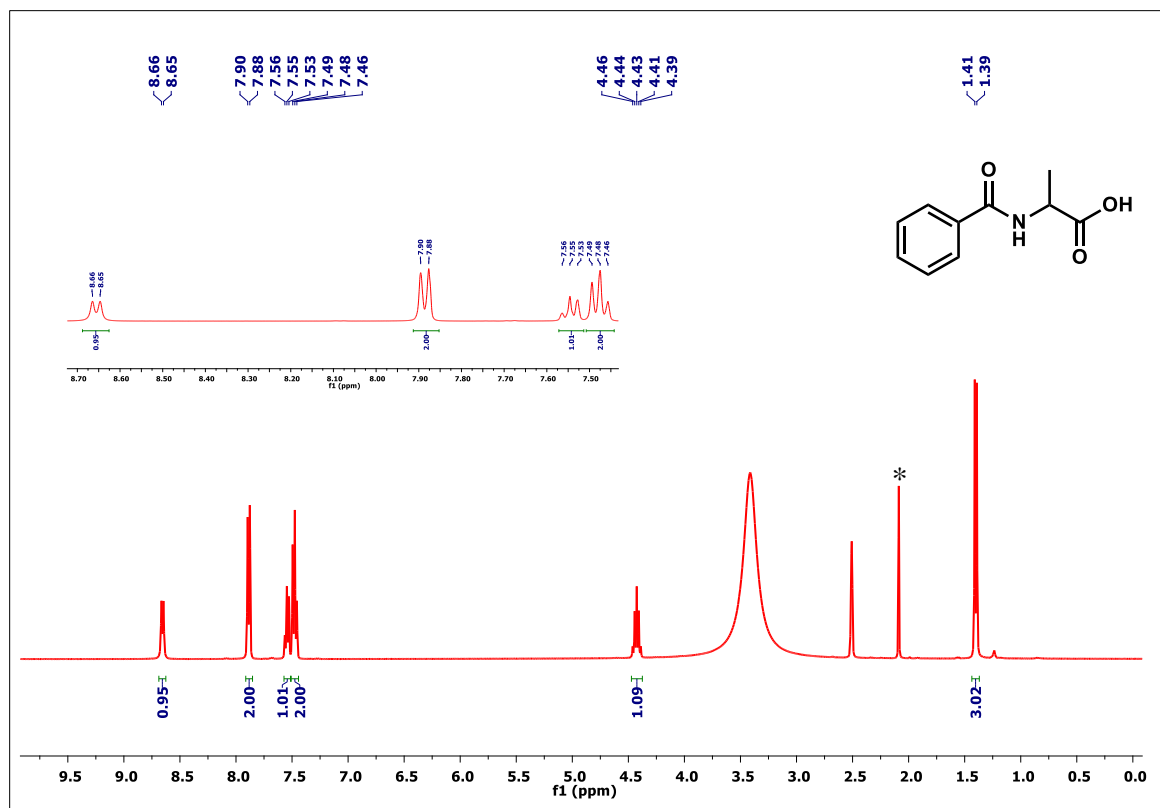

Figure S51: 400 MHz <sup>1</sup>H NMR spectrum of **17** in DMSO-d<sub>6</sub>. \*acetone

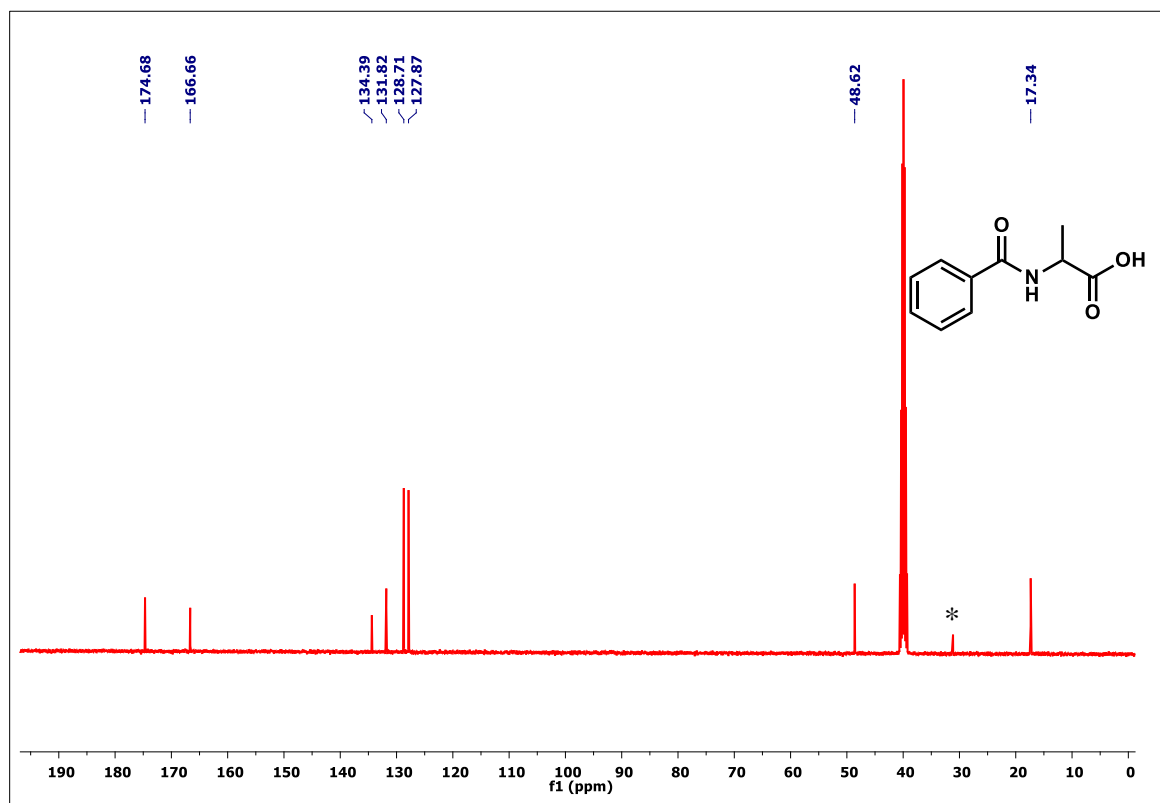

Figure S52: 100 MHz <sup>13</sup>C NMR spectrum of **17** in DMSO-d<sub>6</sub>. \*acetone



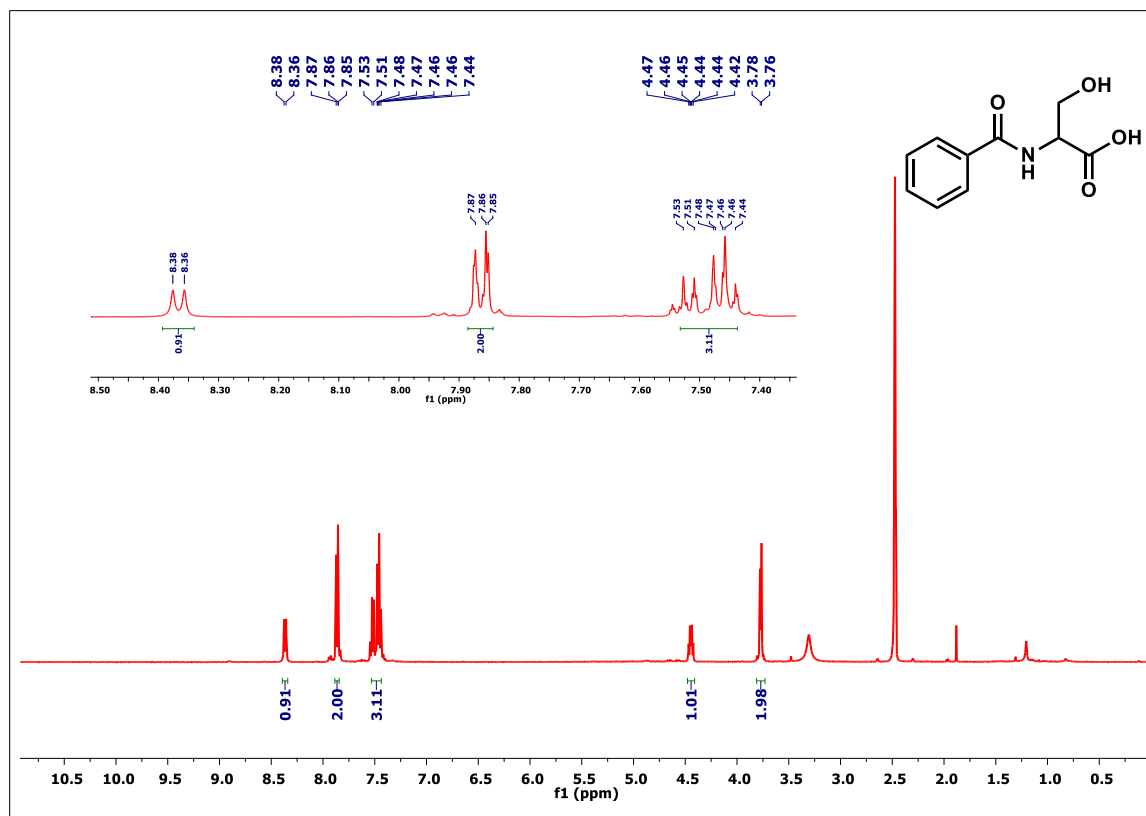

Figure S53: 400 MHz  $^1\text{H}$  NMR spectrum of **18** in  $\text{DMSO-d}_6$

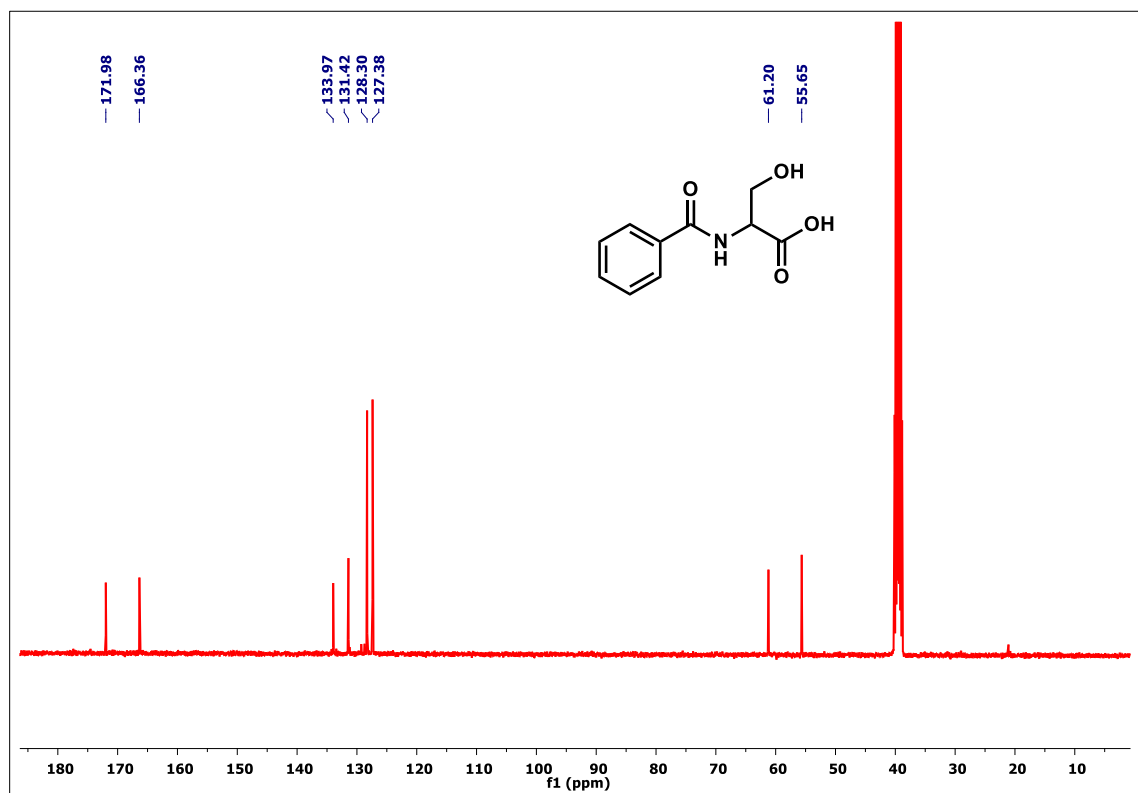

Figure S54: 100 MHz  $^{13}\text{C}$  NMR spectrum of **18** in  $\text{DMSO-d}_6$

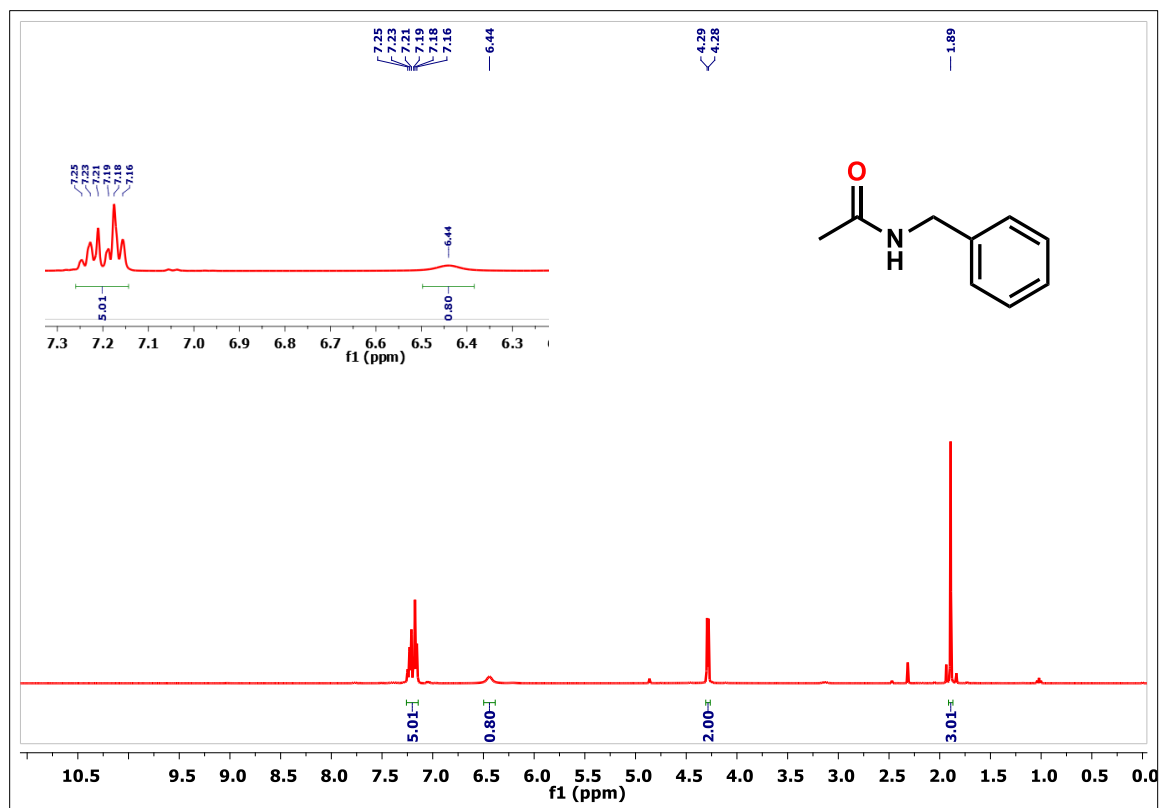

Figure S55: 400 MHz  $^1\text{H}$  NMR spectrum of **19** in  $\text{CDCl}_3$

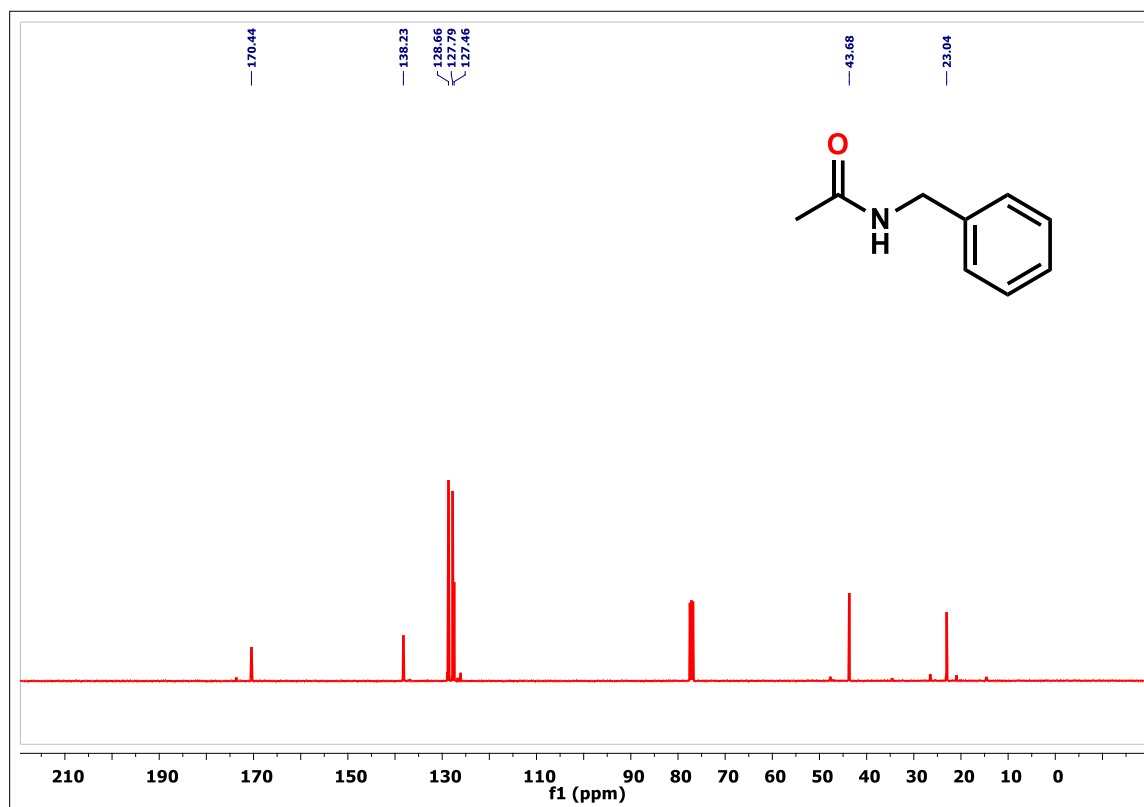

Figure S56: 100 MHz  $^{13}\text{C}$  NMR spectrum of **19** in  $\text{CDCl}_3$

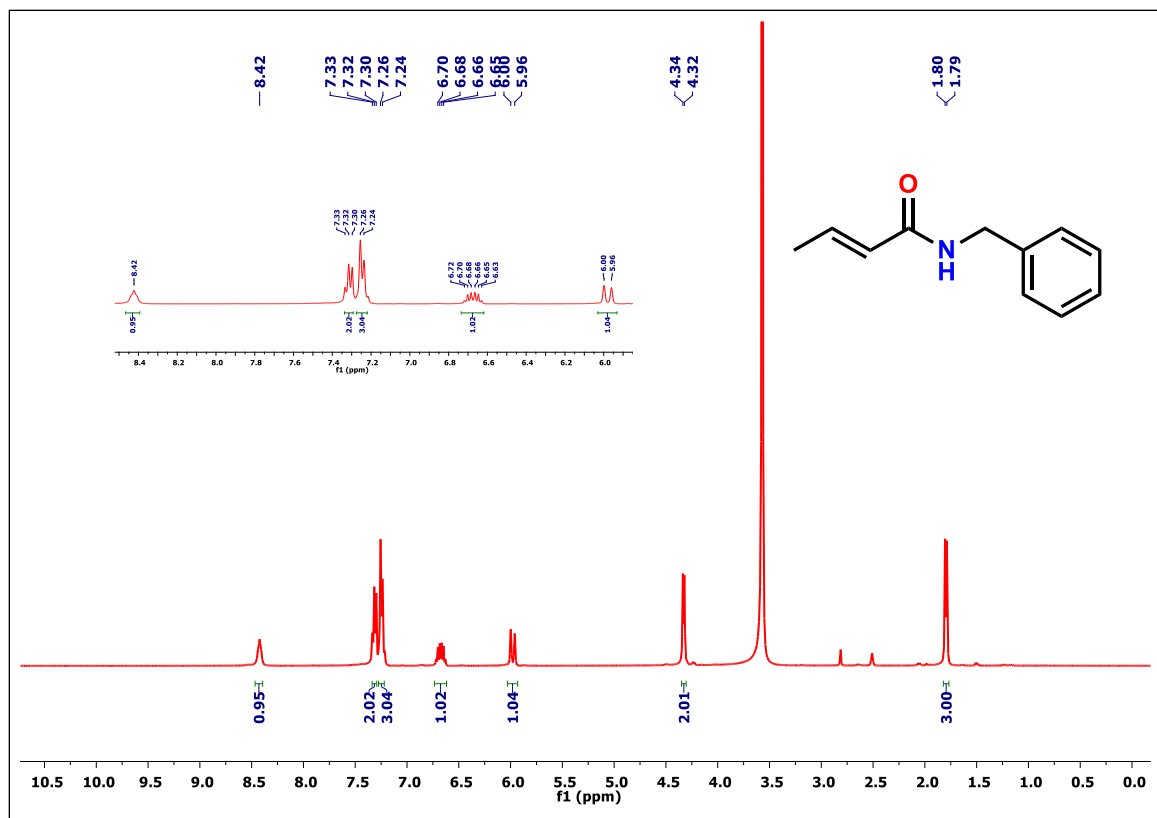

Figure S57: 100 MHz  $^{13}\text{C}$  NMR spectrum of **20** in DMSO- $\text{d}_6$

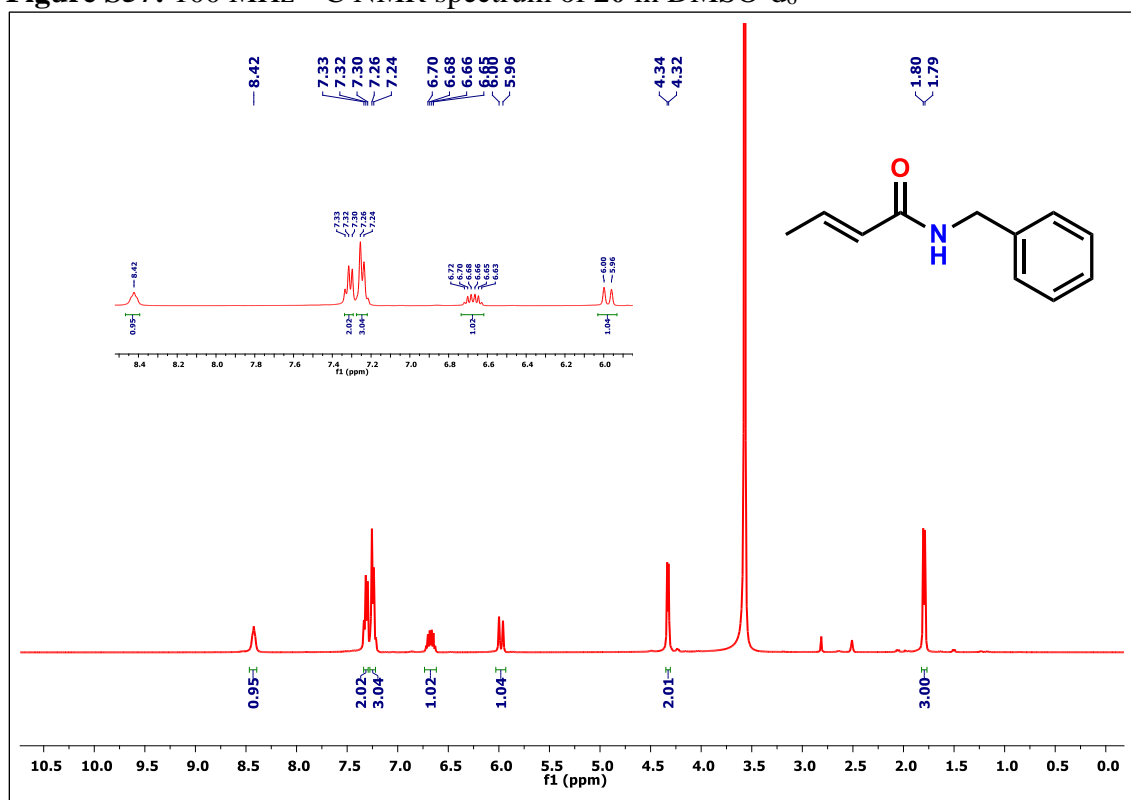

Figure S58: 100 MHz  $^{13}\text{C}$  NMR spectrum of **20** in DMSO- $\text{d}_6$

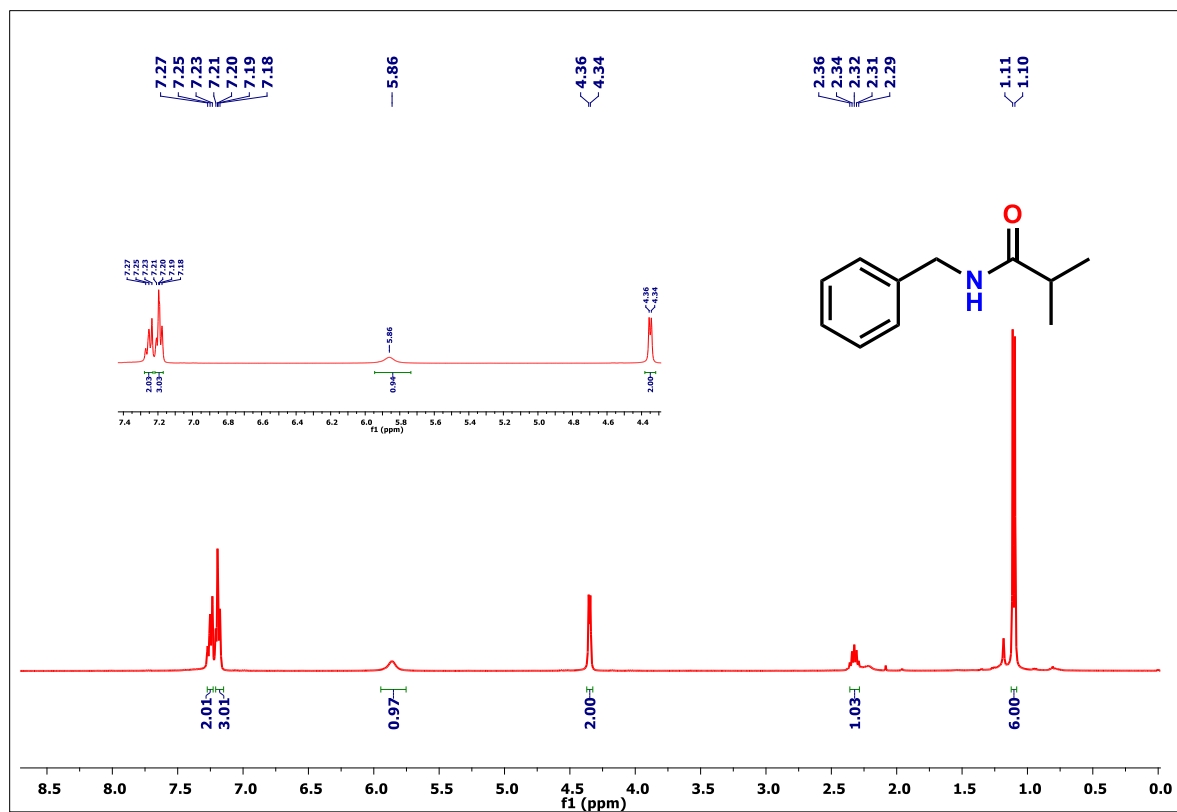

**Figure S59:** 400 MHz  $^1\text{H}$  NMR spectrum of **21** in  $\text{CDCl}_3$

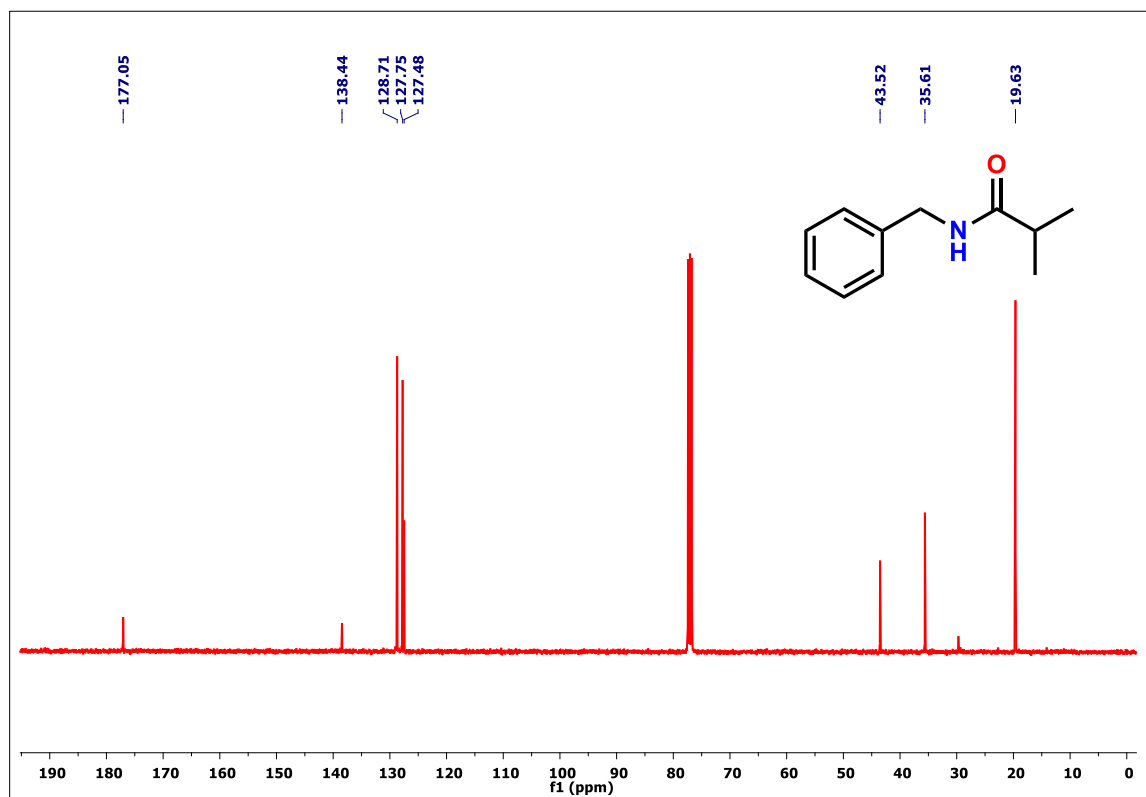

**Figure S60:** 100 MHz  $^{13}\text{C}$  NMR spectrum of **21** in  $\text{CDCl}_3$

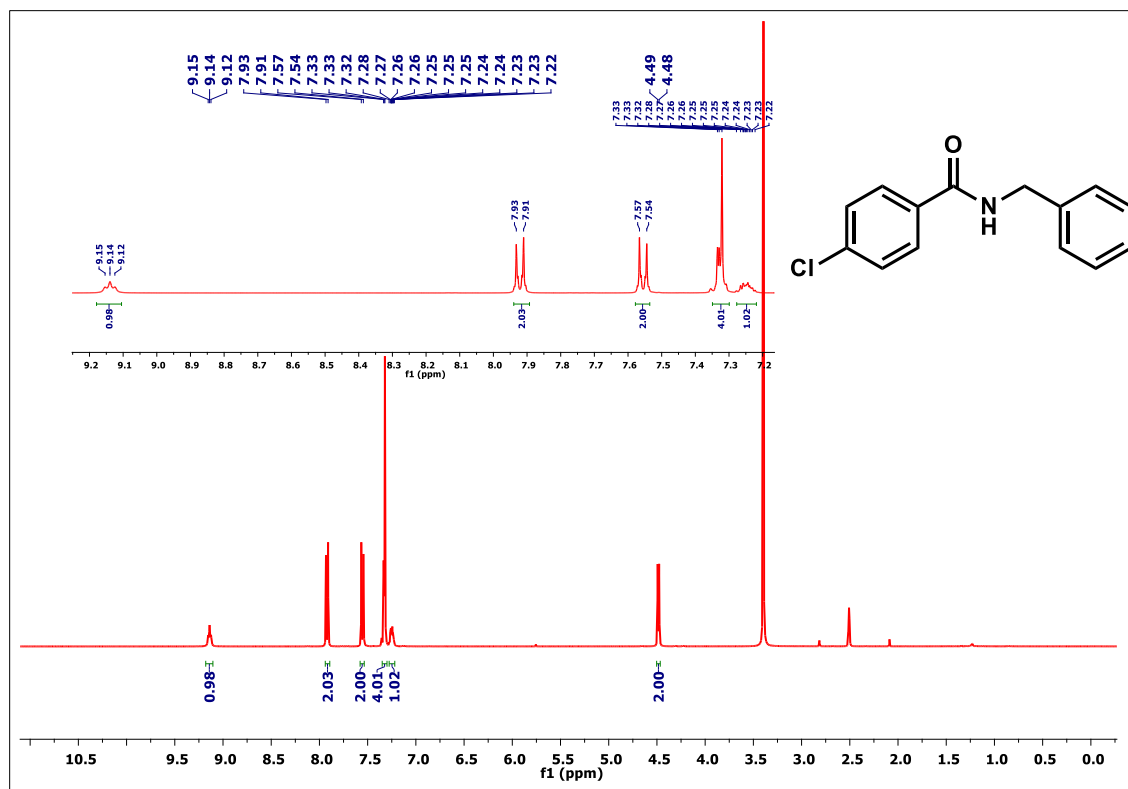

Figure S61: 400 MHz <sup>1</sup>H NMR spectrum of **22** in DMSO-d<sub>6</sub>

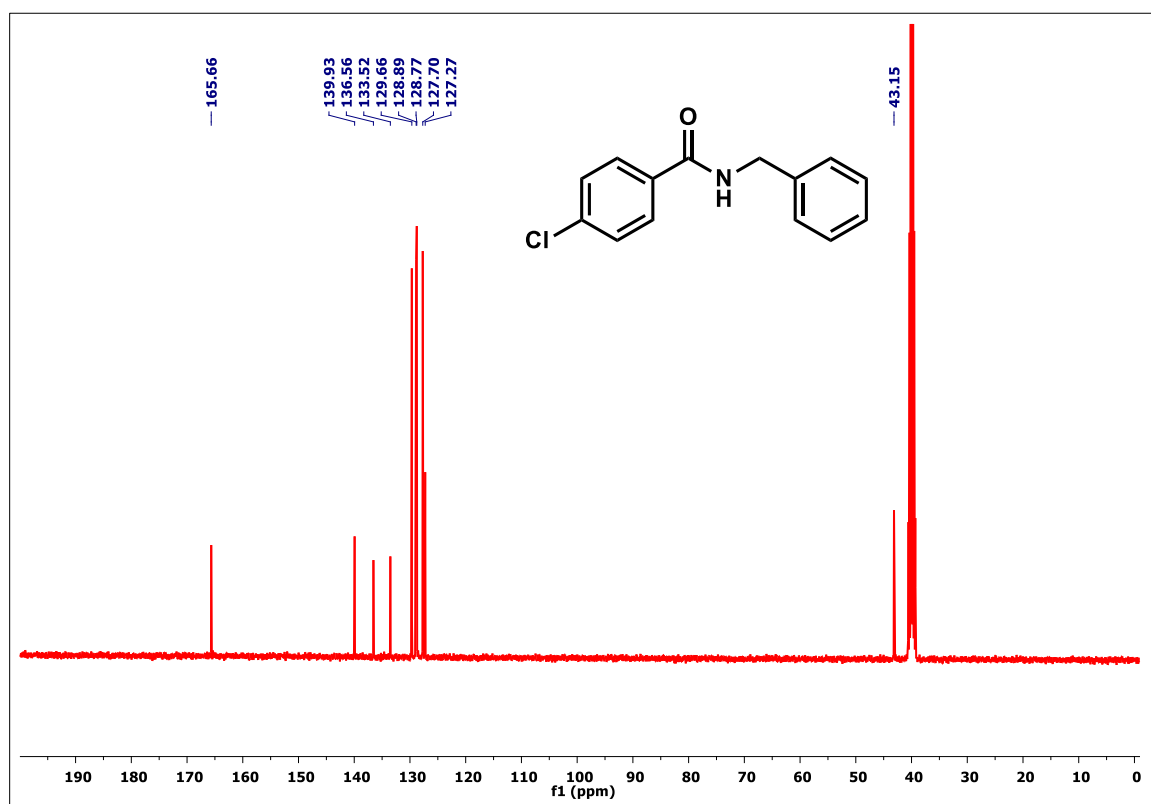

Figure S62: 100 MHz <sup>13</sup>C NMR spectrum of **22** in DMSO-d<sub>6</sub>

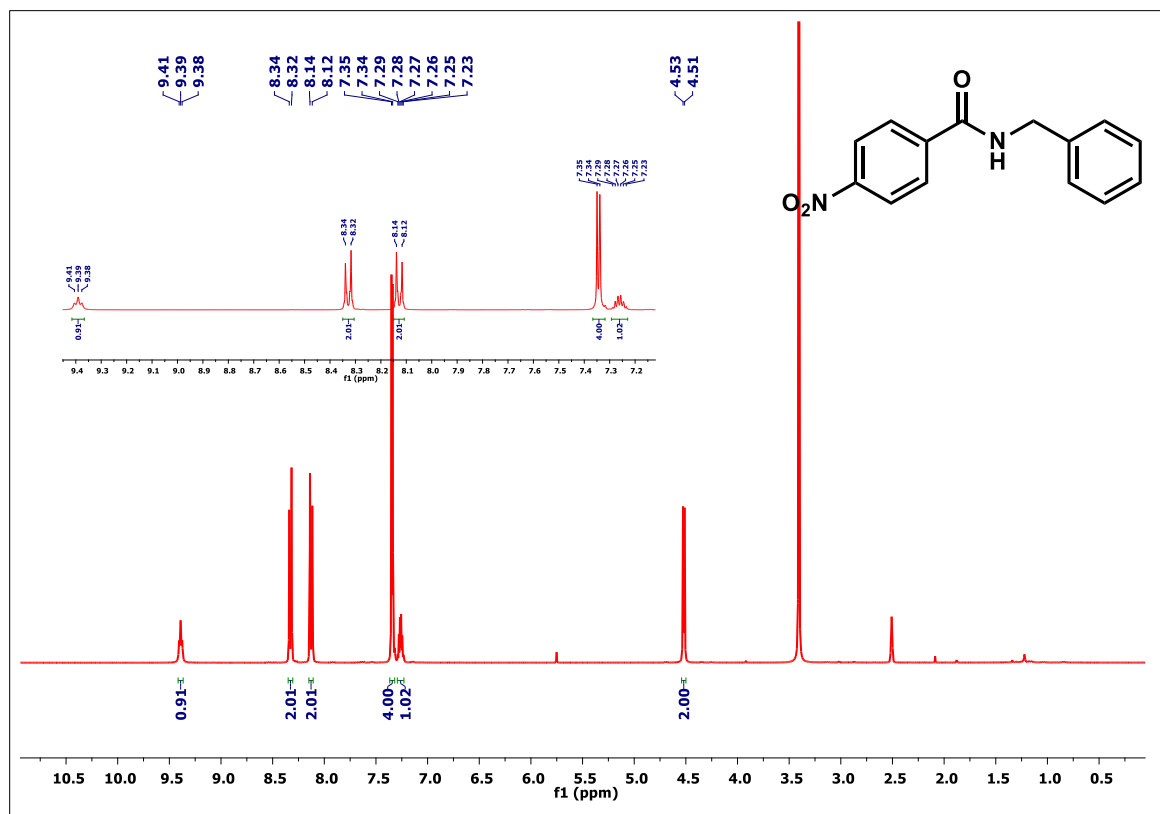

**Figure S63:** 400 MHz <sup>1</sup>H NMR spectrum of **23** in DMSO-d<sub>6</sub>

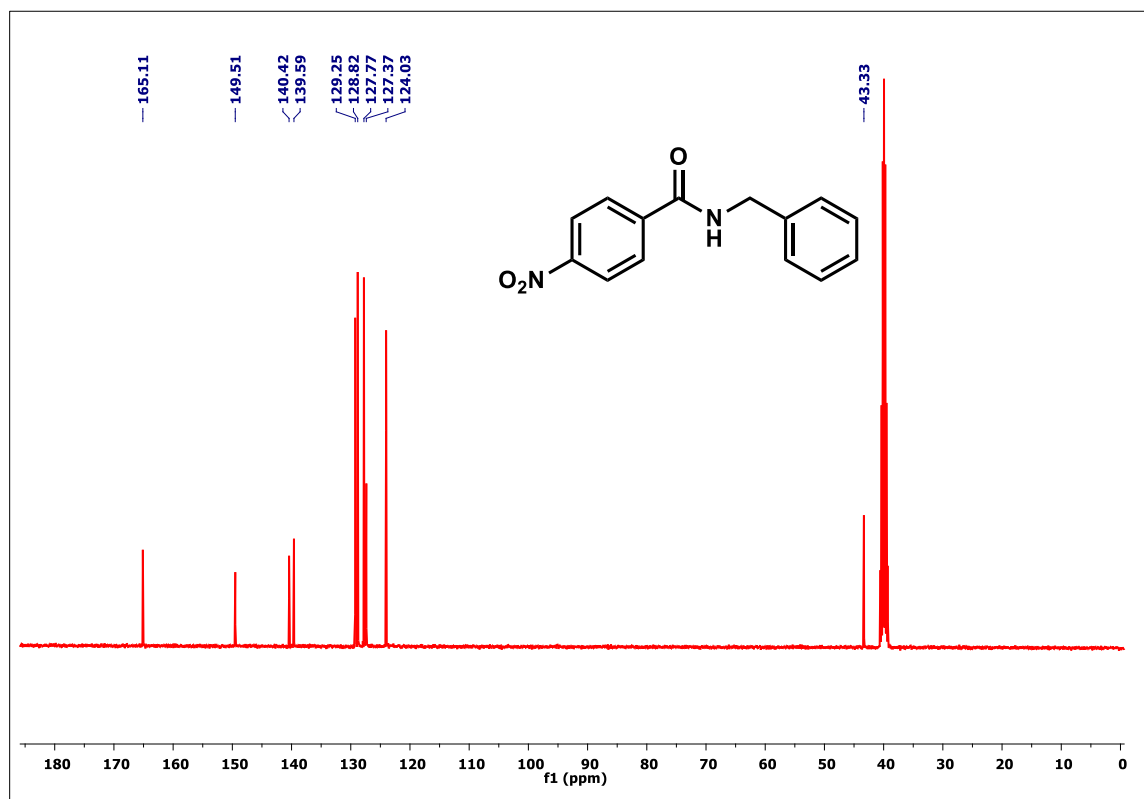

**Figure S64:** 100 MHz <sup>13</sup>C NMR spectrum of **23** in DMSO-d<sub>6</sub>

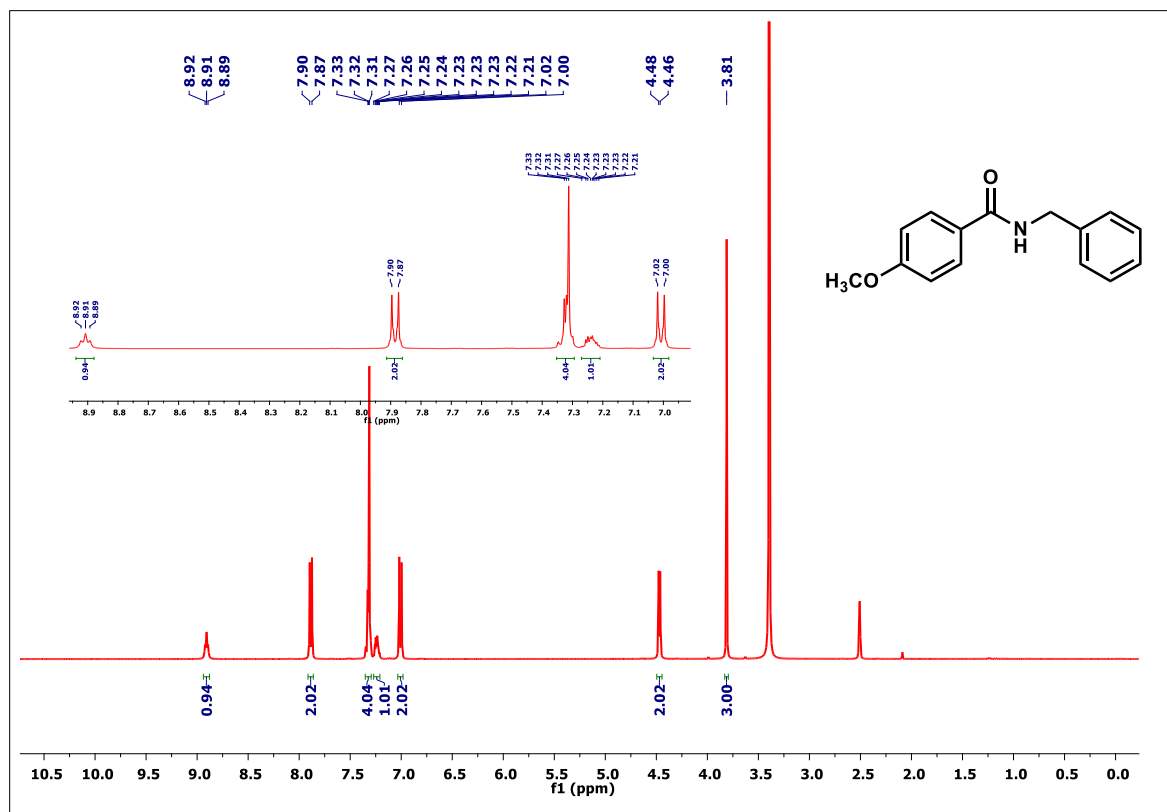

Figure S65: 400 MHz <sup>1</sup>H NMR spectrum of **24** in DMSO-d<sub>6</sub>

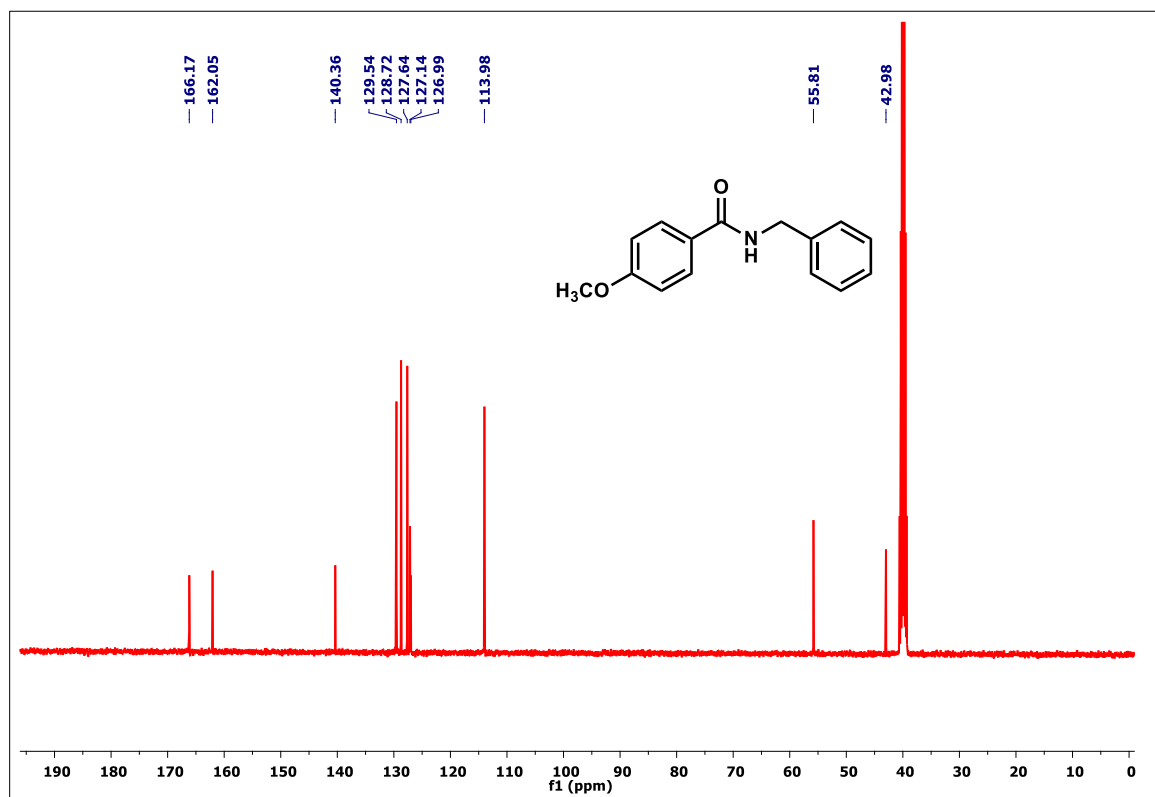

Figure S66: 100 MHz <sup>13</sup>C NMR spectrum of **24** in DMSO-d<sub>6</sub>

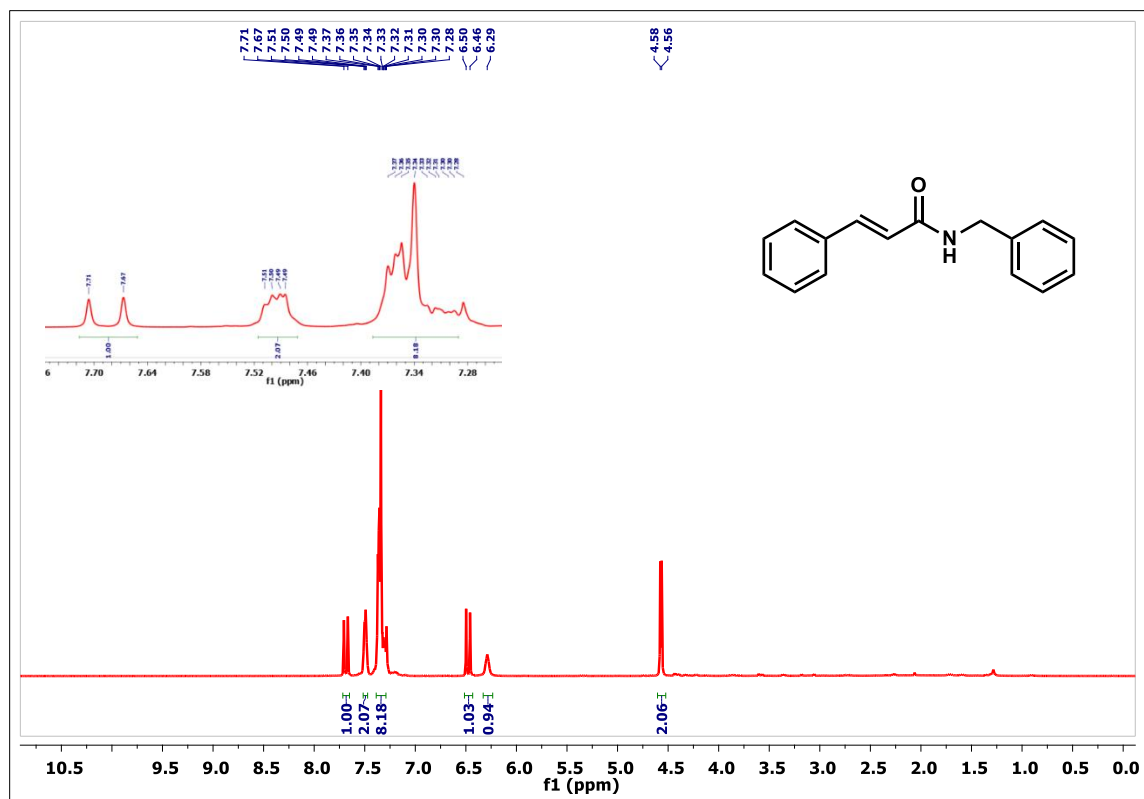

**Figure S67: 400 MHz  $^1\text{H}$  NMR spectrum of **25** in  $\text{CDCl}_3$**

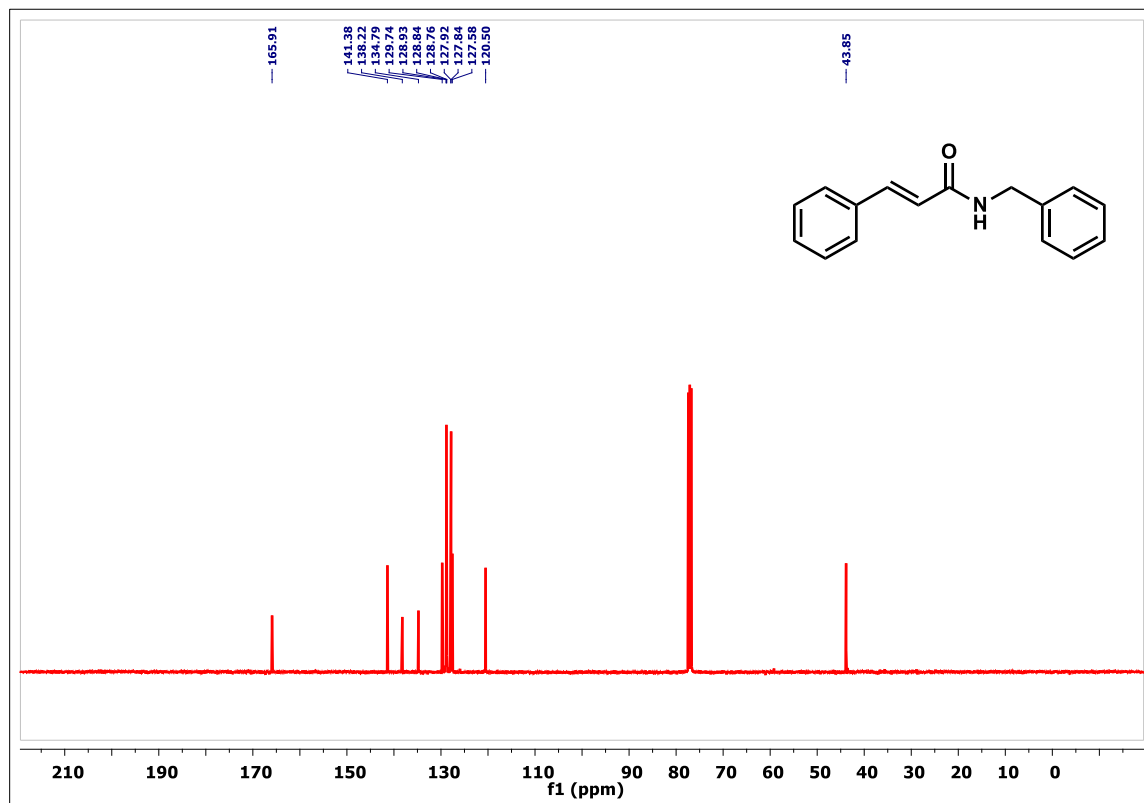

**Figure S68: 100 MHz  $^{13}\text{C}$  NMR spectrum of **25** in  $\text{CDCl}_3$**



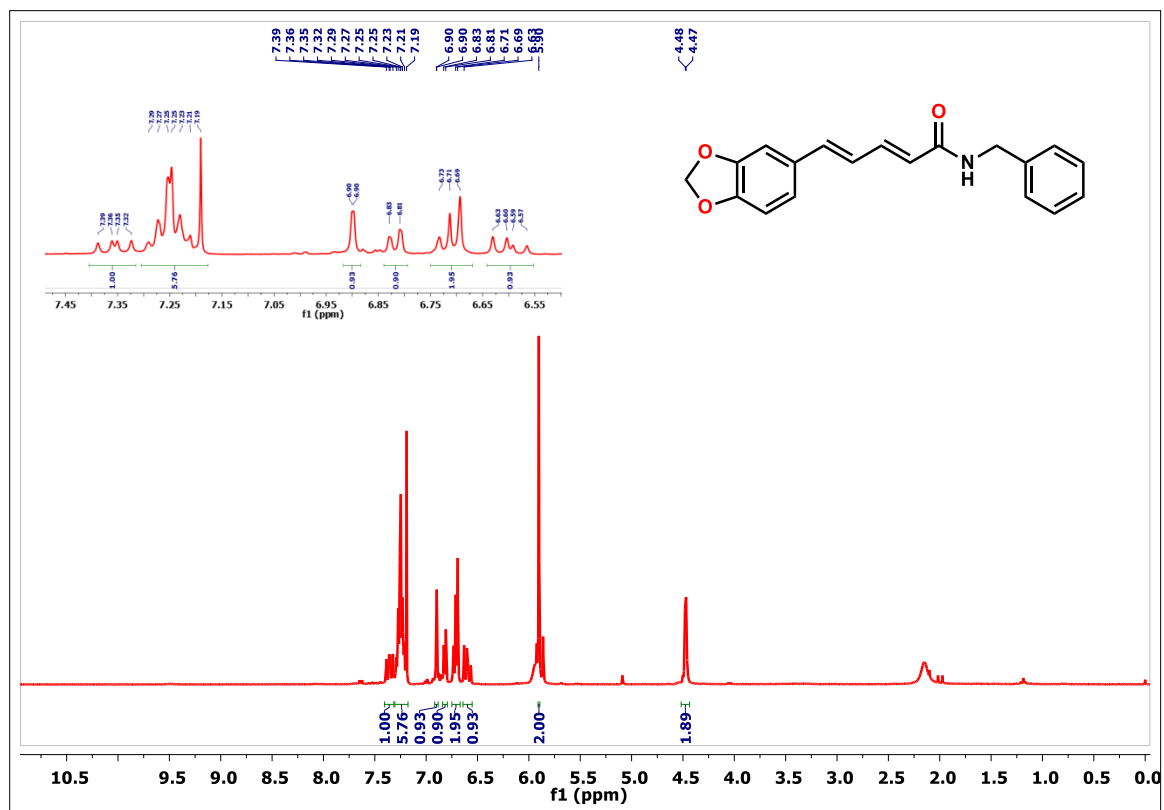

**Figure S69:** 400 MHz <sup>1</sup>H NMR spectrum of **26** in CDCl<sub>3</sub>

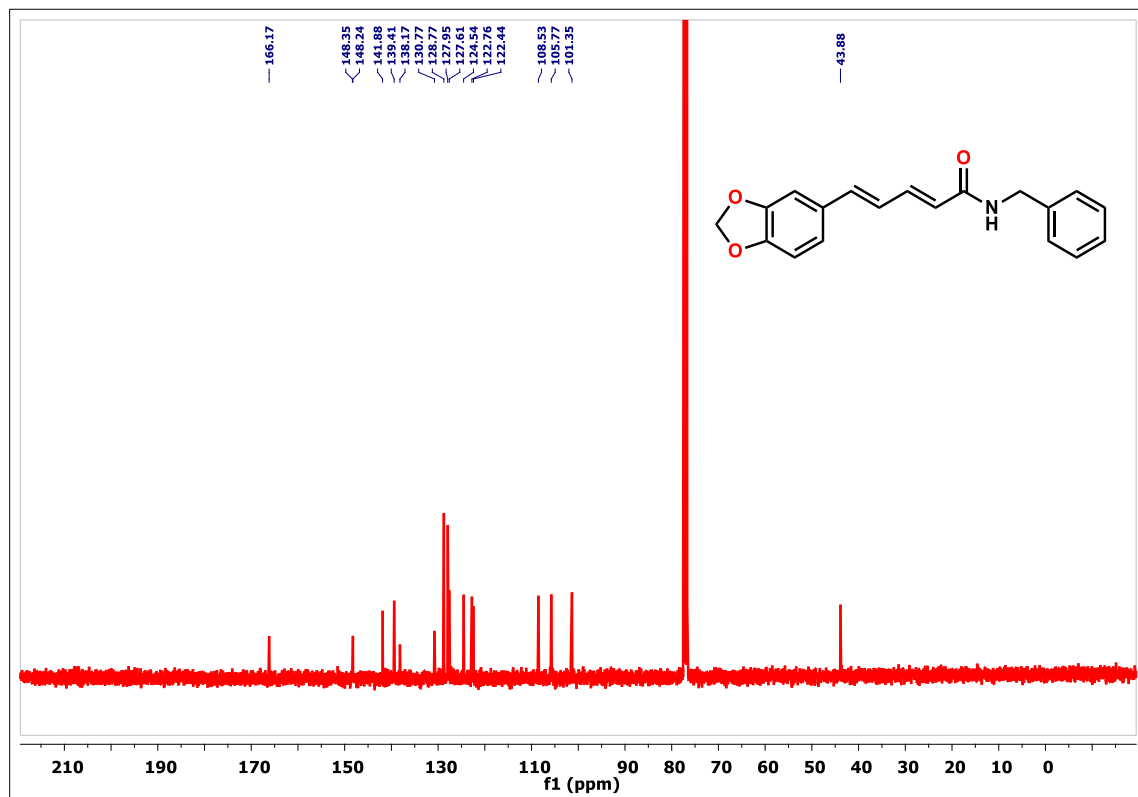

**Figure S70:** 100 MHz <sup>13</sup>C NMR spectrum of **26** in CDCl<sub>3</sub>

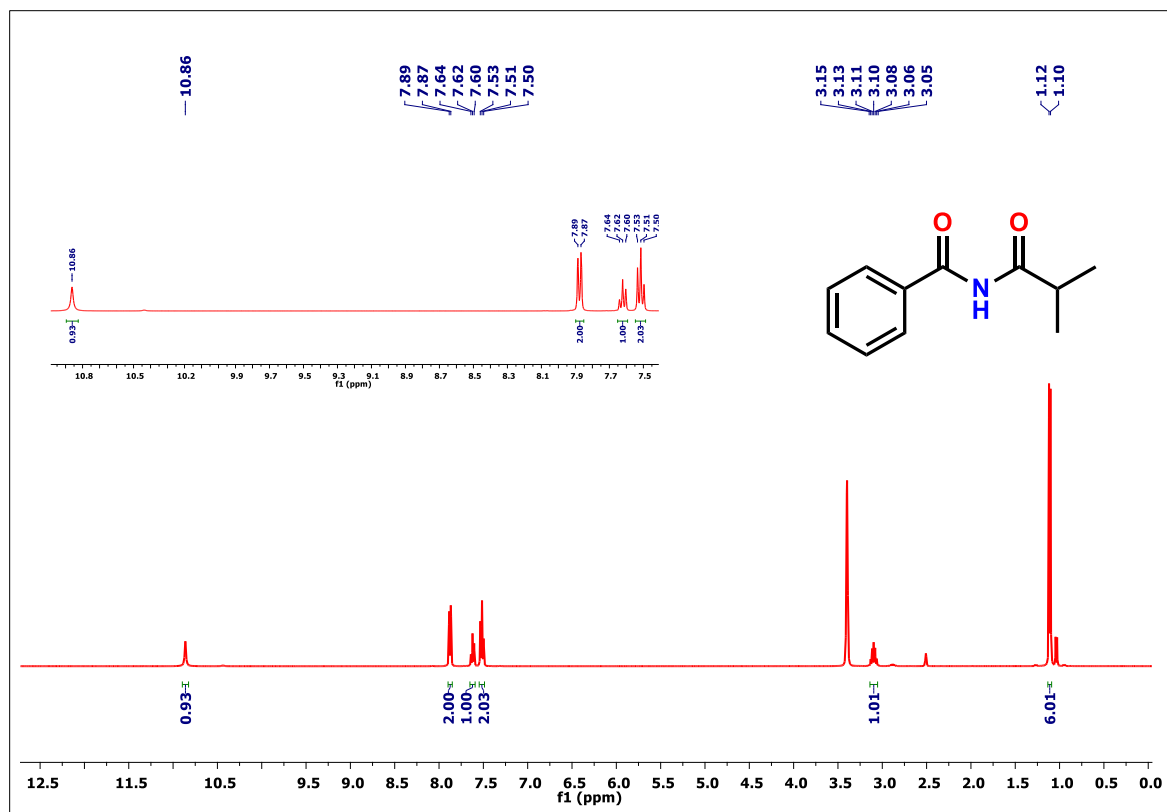

**Figure S71:** 400 MHz  $^1\text{H}$  NMR spectrum of **27** in  $\text{DMSO-d}_6$

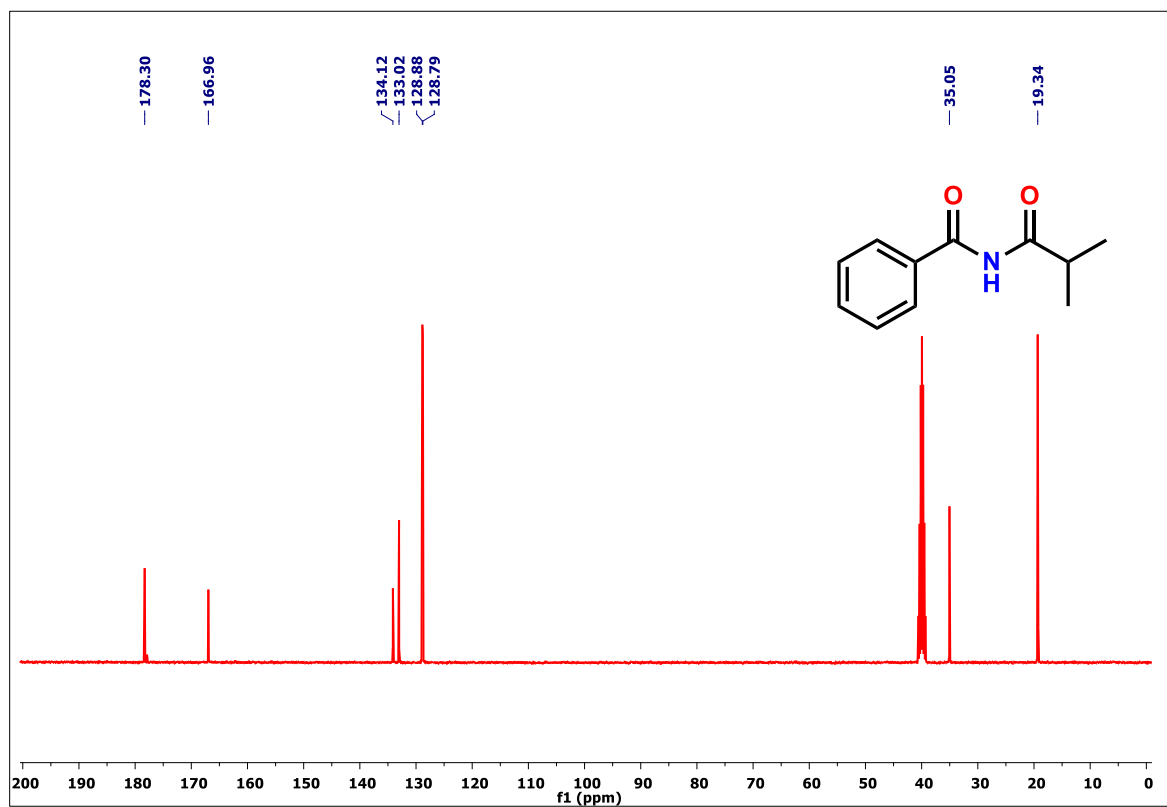

**Figure S72:** 100 MHz  $^{13}\text{C}$  NMR spectrum of **27** in  $\text{DMSO-d}_6$

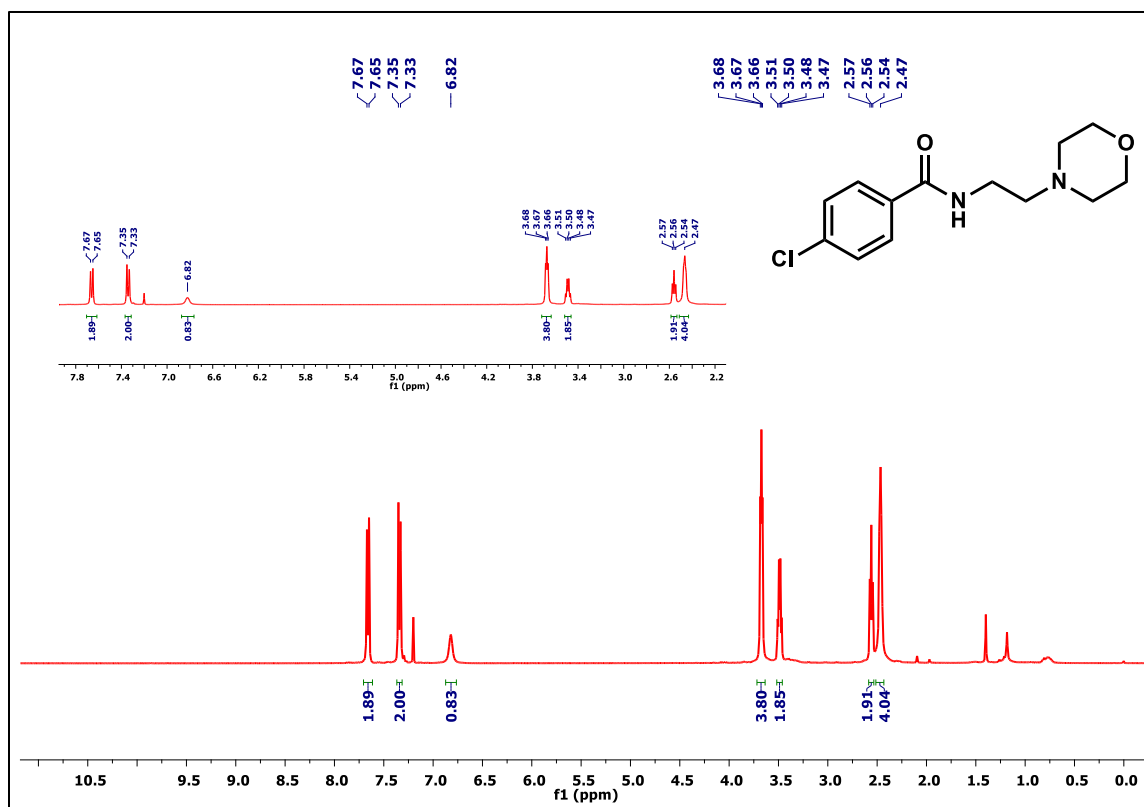

**Figure S73:** 400 MHz <sup>1</sup>H NMR spectrum of **28** in CDCl<sub>3</sub>

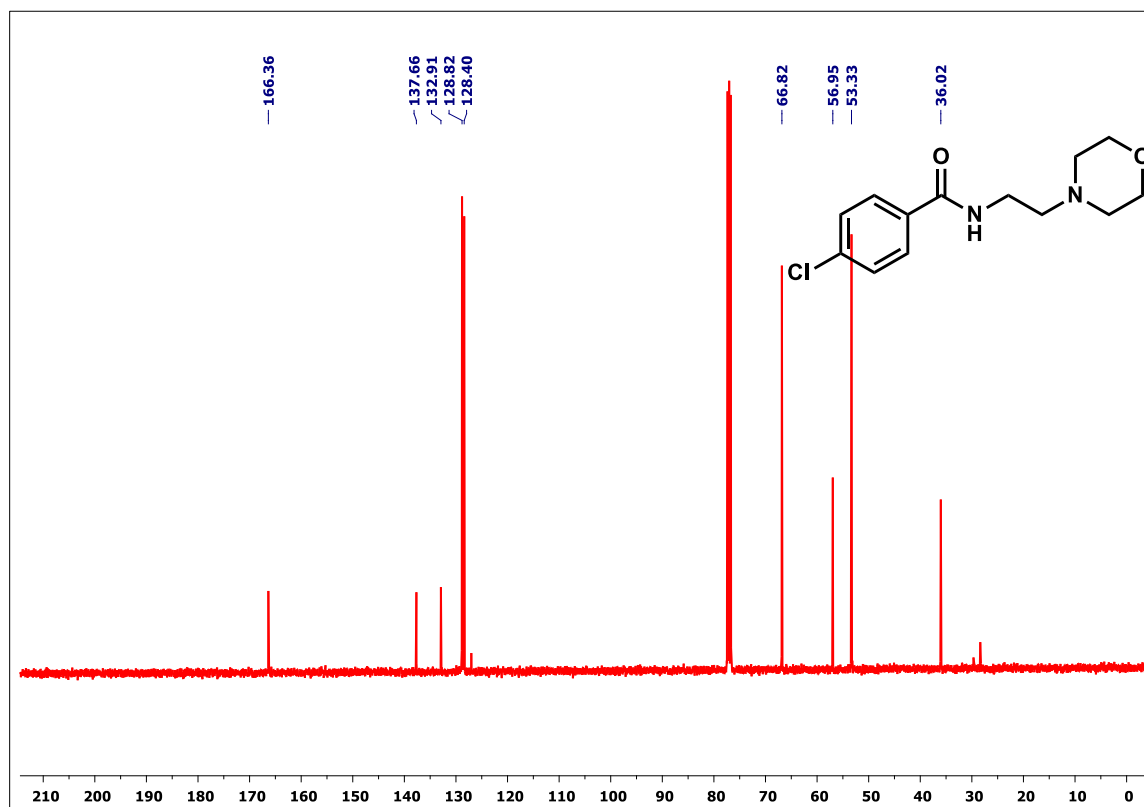

**Figure S74:** 100 MHz <sup>13</sup>C NMR spectrum of **28** in CDCl<sub>3</sub>

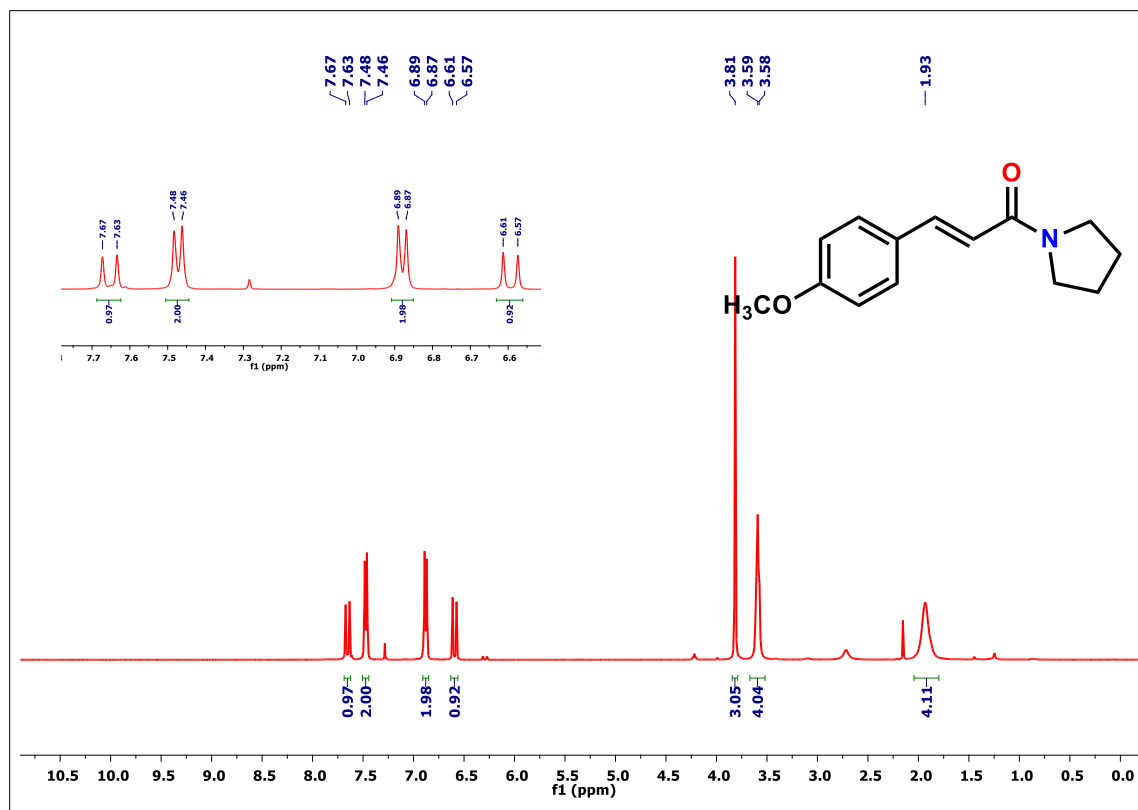

Figure S75: 400 MHz <sup>1</sup>H NMR spectrum of **29** in CDCl<sub>3</sub>

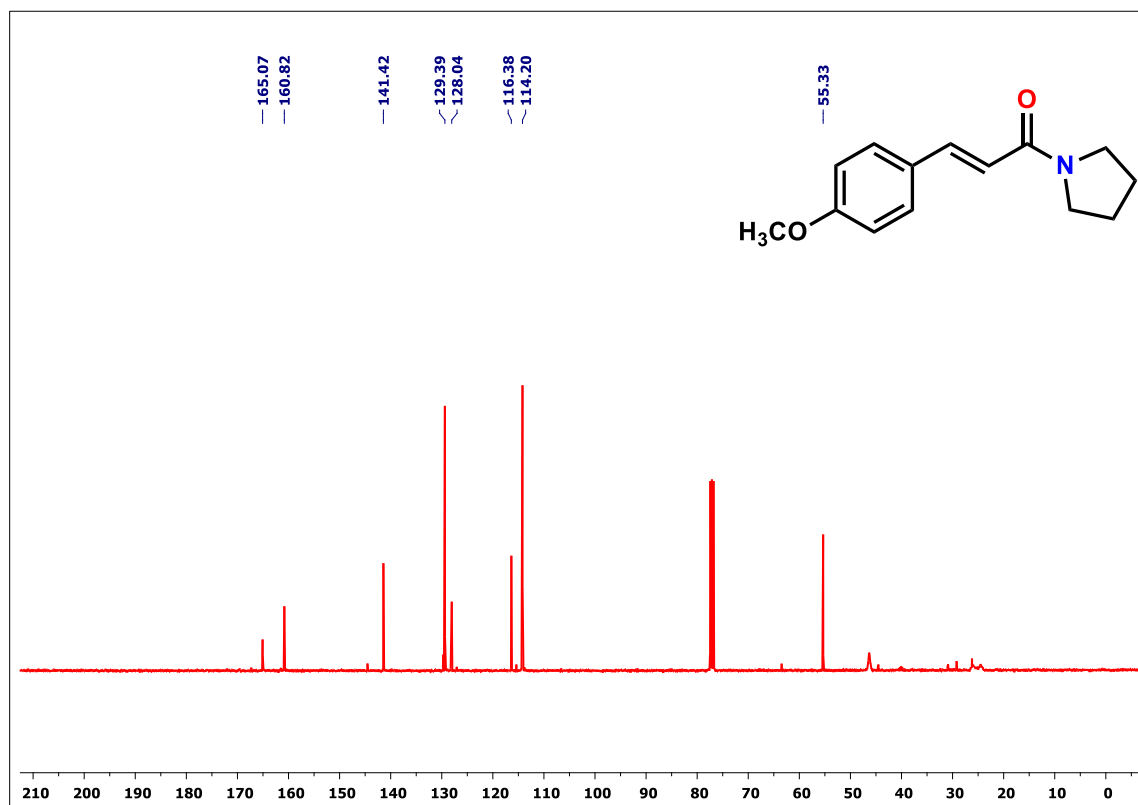

Figure S76: 100 MHz <sup>13</sup>C NMR spectrum of **29** in CDCl<sub>3</sub>

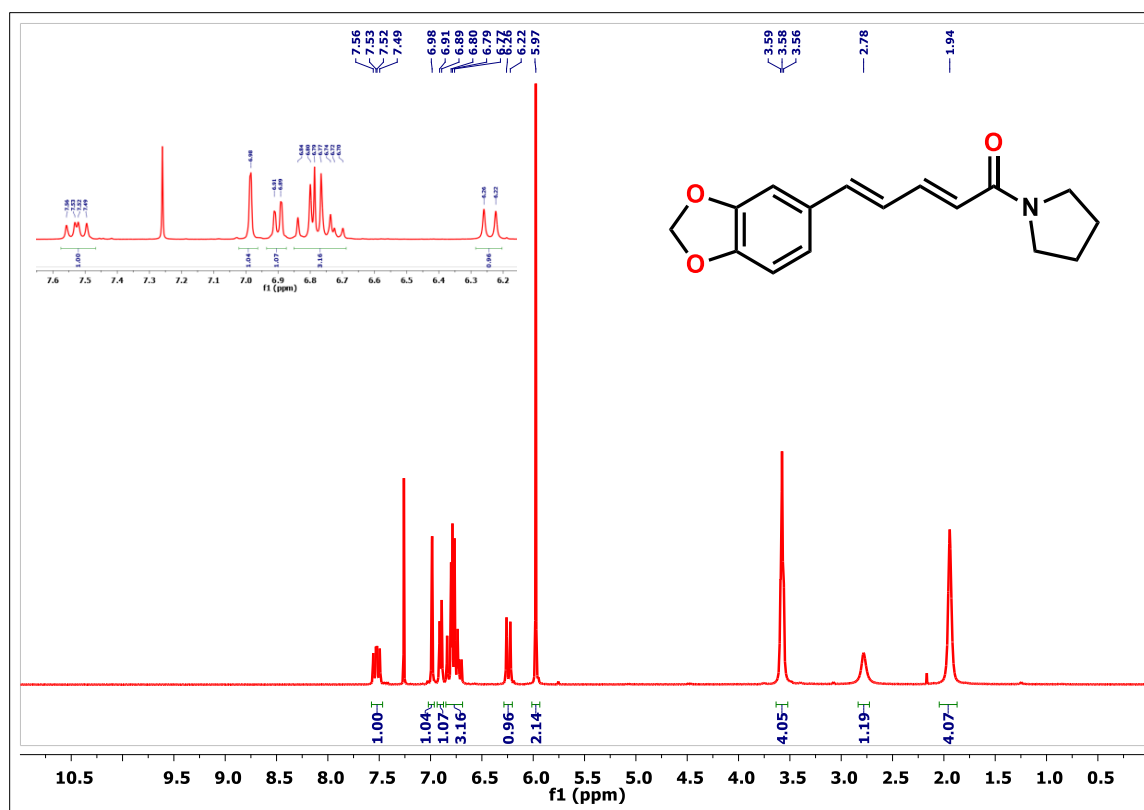

Figure S77: 400 MHz  $^1\text{H}$  NMR spectrum of **30** in  $\text{CDCl}_3$

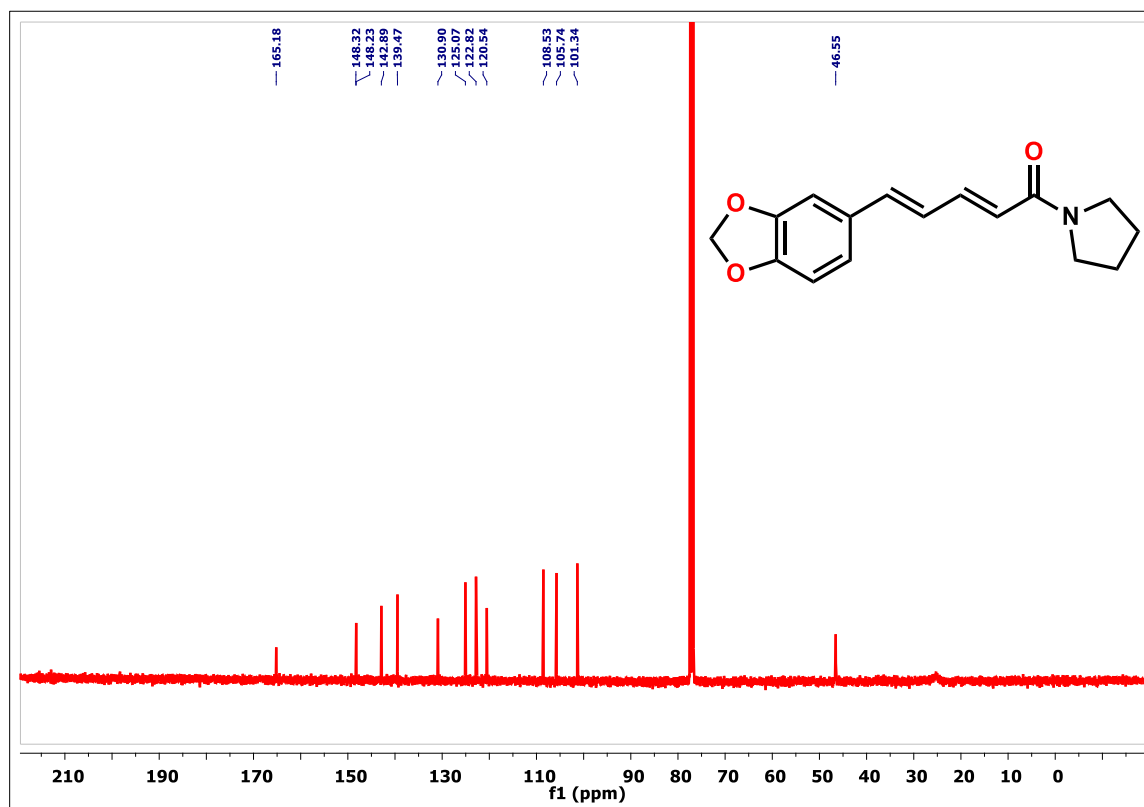

Figure S78: 100 MHz  $^{13}\text{C}$  NMR spectrum of **30** in  $\text{CDCl}_3$
